# Supplementary material for: Dopamine Inhibits Arabidopsis Growth through Increased Oxidative Stress and Auxin Activity
Source: MDPI journal article supplement (doi:10.3390/stresses3010026), 2023-03-02
Supplement: s1 [file s1]

Archive with 4 entries (4 files):
- Suplemental Figures Shull et al. 2022 .pdf
- Table S1.xlsx
- Table S2.xlsx
- Table S3.xlsx
