# Supplementary material for: Dopamine Inhibits Arabidopsis Growth through Increased Oxidative Stress and Auxin Activity
Source: MDPI journal article supplement (doi:10.3390/stresses3010026), 2023-03-02
Supplement: s1 [file s1 › Table S1.xlsx]

## Sheet: All
mapped_id	gene_name	extended_name	tair_summary	2H_logFC	2H_FDR	8H_logFC	8H_FDR	NOTE: For Gene level expression data which contains a Log2 fold change value and a FDR or P value of 0 - the P / FDR values are below the minimum representable number in R, causing DeSeq2 to return a 0 for these values. In other words, these values are below the threshold for being distingushed as different from 0. These can be safely interpreted as a significant result.
AT5G55050	AT5G55050		GDSL-motif esterase/acyltransferase/lipase. Enzyme group with broad substrate specificity that may catalyze acyltransfer or hydrolase reactions with lipid and non-lipid substrates. The mRNA is cell-to-cell mobile.	-2.40579	7.74631e-35	0	0
AT3G59220	PRN	pirin	encodes a cupin-domain containing protein that is similar to pirins which interact with a CCAAT box binding transcription factor. The protein interacts with GPA1 (G protein alpha-subunit) in vitro. Mutants in the gene are affected in germination and early seedling development.	-2.109	1.38707e-67	0	0
AT3G30775	ERD5	EARLY RESPONSIVE TO DEHYDRATION 5	Encodes a proline oxidase that is predicted to localize to the inner mitochondrial membrane, its mRNA expression induced by high levels of Al and by osmotic stress. The promoter contains an L-proline-inducible element.	-1.78087	2.9161e-52	0	0
AT4G27730	OPT6	oligopeptide transporter 1	oligopeptide transporter	-1.77475	1.66318e-39	0	0
AT1G77330	ACO5		similar to 1-aminocyclopropane-1-carboxylate oxidase GI:3386565 from (Sorghum bicolor)	-1.73698	1.4711e-46	0	0
AT5G20250	DIN10	DARK INDUCIBLE 10	encodes a member of glycosyl hydrolase family 36. Expression is induced within 3 hours of dark treatment, in senescing leaves and treatment with exogenous photosynthesis inhibitor. Induction of gene expression was suppressed in excised leaves supplied with sugar. The authors suggest that the gene's expression pattern is responding to the level of sugar in the cell. The mRNA is cell-to-cell mobile.	-1.66196	3.0551e-38	0	0
AT2G02990	RNS1	ribonuclease 1	Encodes a member of the ribonuclease T2 family that responds to inorganic phosphate starvation, and inhibits production of anthocyanin. Also involved in wound-induced signaling independent of jasmonic acid. Its expression is responsive to both phosphate (Pi) and phosphite (Phi) in roots.	-1.65634	1.5556e-16	0	0
AT4G05120	FUR1	FUDR RESISTANT 1	Encodes an equilibrative nucleoside transporter AtENT3. Mutations of this locus allow mutants to grow on uridine analogue fluorouridine.	-1.64859	4.99041e-21	0	0
AT3G06850	BCE2		dihydrolipoamide branched chain acyltransferase	-1.57844	2.20806e-45	0	0
AT4G39660	AGT2	alanine:glyoxylate aminotransferase 2	alanine:glyoxylate aminotransferase 2 homolog (AGT2). The mRNA is cell-to-cell mobile.	-1.48045	1.17578e-45	0	0
AT5G22920	AtRZPF34, CHYR1, RZPF34		Encodes a protein with sequence similarity to RING, zinc finger proteins. Loss of function mutations show reduced (15%) stomatal aperture under non stress conditions.	-1.34689	1.09618e-38	0	0
AT5G15350	ENODL17	early nodulin-like protein 17		-1.24395	1.61965e-20	0	0
AT5G56870	BGAL4	beta-galactosidase 4		-1.22291	5.04721e-14	0	0
AT5G62360	PMEI13		Pectin methylesterase inhibitor expressed throughout the plant.	-1.20231	1.49769e-09	0	0
AT5G28770	BZO2H3		BASIC LEUCINE ZIPPER protein which regulates the circadian oscillator gene PSEUDO RESPONSE REGULATOR7 (PRR7) to change the circadian phase in response to sugars. It upregulates PRR7 in response to low energy. bZIP63 and PRR7 are required for correct oscillator phase under light/dark cycles. bZIP protein BZO2H3 mRNA, partial cds	-1.14983	3.11614e-17	0	0
AT5G16010	AT5G16010			-1.14786	3.80112e-25	0	0
AT3G19390	AT3G19390			-1.10081	4.9777e-18	0	0
AT5G64410	OPT4	oligopeptide transporter 4	oligopeptide transporter	-1.05459	5.22346e-15	0	0
AT5G62280	AT5G62280			-1.01978	4.02153e-12	0	0
AT3G25780	AOC3	allene oxide cyclase 3	Encodes allene oxide cyclase, one of the enzymes involved in jasmonic acid biosynthesis. One of four genes in Arabidopsis that encode this enzyme. mRNA expression is upregulated in senescing leaves. Note: Nomenclature for Arabidopsis allene oxide cyclase 3 (AOC3, AT3G25780) gene is based on Stenzel et al. 2003 Plant Molecular Biology 51:895-911. AOC3 (AT3G25780) is also referred to as AOC2 in He …	1.00154	2.92259e-09	0	0
AT1G15125	AT1G15125			1.13823	5.882e-15	0	0
AT1G61890	AT1G61890			1.16488	2.21786e-19	0	0
AT5G42650	AOS	allene oxide synthase	Encodes a member of the cytochrome p450 CYP74 gene family that functions as an allene oxide synthase. This enzyme catalyzes dehydration of the hydroperoxide to an unstable allene oxide in the JA biosynthetic pathway. It shows a dual catalytic activity, the major one being a 13-AOS but also expressing a 9-AOS activity. CFA-Leu, CFA-Val, CFA-Met and CFA-Ala can induce the expression of AOS.	1.19485	1.20593e-21	0	0
AT4G08870	ARGAH2	arginine amidohydrolase 2	Encodes one of the two arginase in the genome. Gene expression is enhanced by methyl jasmonate treatment. It is involved in the defense response to B.cinerea.	1.196	1.03402e-16	0	0
AT3G25760	AOC1	allene oxide cyclase 1	encodes allene oxide cyclase. One of four genes in Arabidopsis that encode this enzyme, which catalyzes an essential step in jasmonic acid biosynthesis. Gene expression is induced during senescence, a process that involves jasmonic acid signalling pathway. The mRNA is cell-to-cell mobile.	1.83328	3.17244e-56	0	0
AT4G24350	AT4G24350			1.93705	1.40415e-26	0	0
AT5G19110	AT5G19110			2.28813	1.0335e-18	0	0
AT5G13220	JAZ10	jasmonate-zim-domain protein 10	Plants overexpressing At5g13220.3, but not At5g13220.1 showed enhanced insensitivity to MeJa.	2.32566	2.0683e-30	0	0
AT5G02230	AT5G02230			2.68603	1.40468e-58	0	0
AT1G15520	ABCG40	ATP-binding cassette G40	ABC transporter family involved in ABA transport and resistance to lead. Localizes to plasma membrane. Upregulated by lead. Expressed in leaves, flowers, stomata and roots.	0	0	9.77914	1.29656e-57
AT2G41240	BHLH100	basic helix-loop-helix protein 100	Encodes a member of the basic helix-loop-helix transcription factor family protein. Functions as a key regulator of iron-deficiency responses independent of the master regulator FIT. Likely regulates genes involved in the distribution of iron within the plant. Phosphatidylinositol 4-phosphate 5-kinase (PIP5K) enzyme family member.	0	0	9.43916	0
AT1G69930	GSTU11	glutathione S-transferase TAU 11	Encodes glutathione transferase belonging to the tau class of GSTs. Naming convention according to Wagner et al. (2002).	0	0	8.33777	3.10175e-237
AT2G30770	CYP71A13	cytochrome P450, family 71, subfamily A, polypeptide 13	putative cytochrome P450	0	0	8.29383	0
AT3G02840	AT3G02840			0	0	8.27006	0
AT3G46080	AT3G46080			0	0	8.19691	8.52873e-152
AT1G14540	PER4	peroxidase 4	Class III peroxidase cell wall-targeted protein localized to the micropylar endosperm facing the radicle. Involved in seed germination.	0	0	8.1521	0
AT1G26380	AtBBE3, FOX, FOX1		Functions in the biosynthesis of 4-hydroxy indole-3-carbonyl nitrile (4-OH-ICN), a cyanogenic phytoalexin in Arabidopsis. FOX1 acts as a dehydrogenase on indole cyanohydrin to form indole carbonyl nitrile.	0	0	7.96936	1.82421e-249
AT2G24850	TAT3	tyrosine aminotransferase 3	Encodes a tyrosine aminotransferase that is responsive to treatment with jasmonic acid.	3.71756	1.46805e-104	7.87496	6.24487e-97
AT2G30750	CYP71A12	cytochrome P450, family 71, subfamily A, polypeptide 12	putative cytochrome P450	0	0	7.81754	0
AT4G01360	BPS3	BYPASS 3	Encodes a protein related to BYPASS1 (BPS1). Regulates production of mobile compound: bps signal.	0	0	7.71921	1.50766e-279
AT2G35980	YLS9	YELLOW-LEAF-SPECIFIC GENE 9	Encodes a protein whose sequence is similar to tobacco hairpin-induced gene (HIN1) and Arabidopsis non-race specific disease resistance gene (NDR1). Expression of this gene is induced by cucumber mosaic virus, spermine and during senescence. The gene product is localized to the chloroplast. The mRNA is cell-to-cell mobile.	0	0	7.41601	4.87105e-180
AT1G09080	BIP3	binding protein 3		0	0	7.30866	6.38027e-151
AT3G60140	DIN2	DARK INDUCIBLE 2	Encodes a protein similar to beta-glucosidase and is a member of glycoside hydrolase family 1. Expression is induced after 24 hours of dark treatment, in senescing leaves and treatment with exogenous photosynthesis inhibitor. Induction of gene expression was suppressed in excised leaves supplied with sugar. The authors suggest that the gene's expression pattern is responding to the level of sugar…	0	0	7.14686	0
AT5G42380	CML37	calmodulin like 37		0	0	7.13681	5.82676e-279
AT3G49620	DIN11	DARK INDUCIBLE 11	encodes a protein similar to 2-oxoacid-dependent dioxygenase. Expression is induced after 24 hours of dark treatment, in senescing leaves and treatment with exogenous photosynthesis inhibitor. Induction of gene expression was suppressed in excised leaves supplied with sugar. The authors suggest that the gene's expression pattern is responding to the level of sugar in the cell.	0	0	7.03906	2.06952e-160
AT1G62420	AT1G62420			0	0	7.0243	4.4701e-240
AT1G56240	PP2-B13	phloem protein 2-B13		0	0	7.00299	3.14593e-192
AT5G52760	AT5G52760			0	0	6.95475	1.12402e-246
AT2G43570	CHI	chitinase, putative		0	0	6.95059	0
AT5G13320	PBS3	AVRPPHB SUSCEPTIBLE 3	Encodes an enzyme capable of conjugating amino acids to 4-substituted benzoates. 4-HBA (4-hydroxybenzoic acid) and pABA (4-aminobenzoate) may be targets of the enzyme in Arabidopsis, leading to the production of pABA-Glu, 4HBA-Glu, or other related compounds. This enzyme is involved in disease-resistance signaling. It is required for the accumulation of salicylic acid, activation of defense respo…	0	0	6.91906	0
AT4G37370	CYP81D8	cytochrome P450, family 81, subfamily D, polypeptide 8	member of CYP81D	0	0	6.84615	0
AT4G11170	RMG1		Encodes RMG1 (Resistance Methylated Gene 1), a NB-LRR disease resistance protein with a Toll/interleukin-1 receptor (TIR) domain at its N terminus. RMG1 is expressed at high levels in response to flg22 and in naive met1/nrpd2 relative to wild-type plants. Expression of this gene is controlled by DNA methylation in its promoter region. The RMG1 promoter region is constitutively demethylated by act…	0	0	6.72216	9.46469e-96
AT1G05680	UGT74E2	Uridine diphosphate glycosyltransferase 74E2	Encodes a UDP-glucosyltransferase, UGT74E2, that acts on IBA (indole-3-butyric acid) and affects auxin homeostasis. The transcript and protein levels of this enzyme are strongly induced by H2O2 and may allow integration of ROS (reactive oxygen species) and auxin signaling. This enzyme can also transfer glycosyl groups to several compounds related to the explosive TNT when this synthetic compound …	0	0	6.65035	9.18442e-201
AT3G13950	AT3G13950			0	0	6.57728	2.15324e-249
AT4G39670	GLTP			0	0	6.56433	7.23662e-152
AT1G13520	AT1G13520			0	0	6.55867	7.06114e-230
AT3G26830	PAD3	PHYTOALEXIN DEFICIENT 3	Mutations in pad3 are defective in biosynthesis of the indole derived phytoalexin camalexin. Encodes a cytochrome P450 enzyme that catalyzes the conversion of dihydrocamalexic acid to camalexin. The mRNA is cell-to-cell mobile.	0	0	6.51646	0
AT1G53625	AT1G53625			0	0	6.46153	4.53143e-140
AT1G61800	GPT2	glucose-6-phosphate/phosphate translocator 2	glucose6-Phosphate/phosphate transporter 2. Expression is upregulated in the shoot of cax1/cax3 mutant. The mRNA is cell-to-cell mobile.	0	0	6.37472	5.92164e-154
AT5G67080	MAPKKK19	mitogen-activated protein kinase kinase kinase 19	member of MEKK subfamily	0	0	6.36712	2.14865e-222
AT1G19250	FMO1	flavin-dependent monooxygenase 1	FMO1 is required for full expression of TIR-NB-LRR conditioned resistance to avirulent pathogens and for basal resistance to invasive virulent pathogens. Functions in an EDS1-regulated but SA-independent mechanism that promotes resistance and cell death at pathogen infection sites. FMO1 functions as a pipecolate N-hydroxylase and catalyzes the biochemical conversion of pipecolic acid to N-hydroxy…	0	0	6.3555	4.82507e-133
AT3G44860	FAMT	farnesoic acid carboxyl-O-methyltransferase	Encodes a farnesoic acid carboxyl-O-methyltransferase. The mRNA is cell-to-cell mobile.	3.67776	3.84966e-94	6.27506	2.16958e-84
AT1G35230	AGP5	arabinogalactan protein 5	Encodes arabinogalactan-protein (AGP5). The mRNA is cell-to-cell mobile.	0	0	6.22336	3.5356e-242
AT1G72520	LOX4	lipoxygenase 4		0	0	6.06899	4.67429e-203
AT5G41750	AT5G41750			0	0	6.06686	0
AT5G25250	FLOT1	flotillin 1	Encodes a protein that is involved in a membrane microdomain-dependent, but clathrin-independent, endocytic pathway required for optimal seedling development. The mRNA is cell-to-cell mobile.	0	0	6.04816	0
AT1G61340	FBS1	F-box stress induced 1	Encodes a F-box protein induced by various biotic or abiotic stress.	0	0	6.01371	2.14671e-109
AT1G66090	AT1G66090			0	0	5.98001	7.85885e-261
AT5G57220	CYP81F2	cytochrome P450, family 81, subfamily F, polypeptide 2	member of CYP81F, involved in glucosinolate metabolism. Mutants had impaired resistance to fungi. The mRNA is cell-to-cell mobile.	2.00835	6.56127e-34	5.97241	9.97796e-307
AT2G46400	WRKY46	WRKY DNA-binding protein 46	Encodes a WRKY transcription factor that contributes to the feedforward inhibition of osmotic/salt stress-dependent LR inhibition via regulation of ABA signaling and auxin homeostasis.	0	0	5.87549	9.23727e-194
AT3G25250	AGC2-1		Arabidopsis protein kinase The mRNA is cell-to-cell mobile.	0	0	5.85004	6.68342e-227
AT1G26420	AtBBE7			0	0	5.76195	3.95114e-188
AT5G13080	WRKY75	WRKY DNA-binding protein 75	WRKY75 is one of several transcription factors induced during Pi deprivation. It is nuclear localized and regulated differentially during Pi starvation. RNAi mediated suppression of WRKY75 made the plants more susceptible to Pi stress as indicated by the higher accumulation of anthocyanin during Pi starvation.	0	0	5.70163	2.00123e-240
AT3G22910	ACA13			0	0	5.6887	4.36489e-110
AT5G25260	flot2		Belongs to the group of plant flotillins, which are plasma membrane proteins. Flot2 complexes are found in microdomains and may be involved in plant-pathogen interactions, water transport and intracellular trafficking.	0	0	5.5696	1.26684e-175
AT1G19020	SDA1		Modulates defense against bacterial pathogens and tolerance to oxidative stress.	0	0	5.51783	5.26184e-99
AT2G45220	AtPME17, PME17		Pectin methylesterase involved in pectin remodelling. Regulated by its PRO region that triggers PME activity in the resistance to Botrytis cinerea.	0	0	5.44642	1.2463e-145
AT3G54150	EFD		Encodes a DNA methyltransferase required for pollen exine formation and male fertility via the regulation of callose wall and primexine formation.	0	0	5.4341	4.50766e-276
AT4G14365	XBAT34	XB3 ortholog 4 in Arabidopsis thaliana		0	0	5.4296	0
AT1G21120	IGMT2	indole glucosinolate O-methyltransferase 2		1.51572	2.86165e-30	5.40889	2.0128e-244
AT5G27420	CNI1	carbon/nitrogen insensitive 1	Encodes CNI1 (Carbon/Nitrogen Insensitive1) (also named as ATL31), a RING type ubiquitin ligase that functions in the Carbon/Nitrogen response for growth phase transition in Arabidopsis seedlings. The mRNA is cell-to-cell mobile.	3.87888	1.14031e-113	5.40667	7.93505e-237
AT4G22710	CYP706A2	cytochrome P450, family 706, subfamily A, polypeptide 2	member of CYP706A	4.00607	8.81245e-140	5.36076	3.61999e-57
AT5G59820	RHL41	RESPONSIVE TO HIGH LIGHT 41	Encodes a zinc finger protein involved in high light and cold acclimation. Overexpression of this putative transcription factor increases the expression level of 9 cold-responsive genes and represses the expression level of 15 cold-responsive genes, including CBF genes. Also, lines overexpressing this gene exhibits a small but reproducible increase in freeze tolerance. Because of the repression o…	0	0	5.35533	2.66931e-38
AT3G50930	BCS1	cytochrome BC1 synthesis	Encodes a protein that is present in a homo-multimeric protein complex on the outer mitochondrial membrane and plays a role in cell death and amplifying salicylic acid signalling. The mRNA is cell-to-cell mobile.	2.98164	2.16601e-98	5.25526	1.97948e-116
AT1G30700	AtBBE8			0	0	5.18856	9.64817e-287
AT3G46090	ZAT7			0	0	5.11757	4.57735e-117
AT1G09932	AT1G09932			0	0	5.08363	3.49645e-225
AT1G13340	ISTL6			0	0	5.06884	0
AT5G01100	FRB1	FRIABLE 1		0	0	5.05028	5.9654e-141
AT5G26920	CBP60G	Cam-binding protein 60-like G	Encodes a calmodulin-binding protein CBP60g (calmodulin binding protein 60-like.g). The calmodulin-binding domain is located near the N-terminus; calmodulin binding is dependent on Ca(2+). Inducible by both bacterial pathogen and MAMP (microbe-associated molecular pattern) treatments. Bacterial growth is enhanced in cbp60g mutants. cbp60g mutants also show defects in salicylic acid (SA) accumulat…	0	0	4.98302	0
AT1G74360	GRACE, NILR1		NILR1 encodes a serine/threonine kinase involved in defense response to nematodes.	0	0	4.9828	2.41683e-159
AT5G38900	PDI			0	0	4.87059	2.02037e-145
AT2G29460	GSTU4	glutathione S-transferase tau 4	Encodes glutathione transferase belonging to the tau class of GSTs. Naming convention according to Wagner et al. (2002). Role in the degradation of H2O2 to water using glutathione as electron donor	0	0	4.86404	2.88807e-200
AT2G31865	PARG2	poly(ADP-ribose) glycohydrolase 2		0	0	4.86304	2.6185e-200
AT2G34500	CYP710A1	cytochrome P450, family 710, subfamily A, polypeptide 1	Encodes a protein with C22-sterol desaturase activity. The enzyme was shown to catalyze in the presence of NADPH the conversion of &beta;-sitosterol to stigmasterol, but not that of 24-<i>epi</i>-campesterol to brassicasterol (unlike CYP710A2).	0	0	4.84151	8.3071e-152
AT5G05410	DREB2A	DRE-binding protein 2A	Encodes a transcription factor that specifically binds to DRE/CRT cis elements (responsive to drought and low-temperature stress). Belongs to the DREB subfamily A-2 of ERF/AP2 transcription factor family (DREB2A). There are eight members in this subfamily including DREB2B. The protein contains one AP2 domain. Overexpression of transcriptional activation domain of DREB2A resulted in significant dr…	0	0	4.82952	2.66282e-135
AT2G18193	AT2G18193			0	0	4.82313	6.76636e-174
AT2G02010	GAD4	glutamate decarboxylase 4		0	0	4.7829	2.26934e-179
AT1G76600	AT1G76600		PADRE protein up-regulated after infection by S. sclerotiorun.	0	0	4.7736	4.01967e-100
AT3G23250	MYB15	myb domain protein 15	Member of the R2R3 factor gene family. Key regulator of lignin biosynthesis in effector-triggered immunity	0	0	4.76042	1.5205e-45
AT1G80840	WRKY40	WRKY DNA-binding protein 40	Pathogen-induced transcription factor. Binds W-box sequences in vitro. Forms protein complexes with itself and with WRKY40 and WRKY60. Coexpression with WRKY18 or WRKY60 made plants more susceptible to both P. syringae and B. cinerea. WRKY18, WRKY40, and WRKY60 have partially redundant roles in response to the hemibiotrophic bacterial pathogen Pseudomonas syringae and the necrotrophic fungal path…	2.6579	1.656e-71	4.7581	2.15211e-51
AT5G20230	BCB	blue-copper-binding protein	Encodes a Al-stress-induced gene. Along with TCF, it promotes lignin biosynthesis in response to cold stress. The mRNA is cell-to-cell mobile.	1.23966	8.48986e-21	4.74028	1.95045e-166
AT1G08050	AT1G08050			0	0	4.71843	2.64065e-201
AT1G80820	CCR2	cinnamoyl coa reductase	Encodes an cinnamoyl CoA reductase isoform. Involved in lignin biosynthesis.	0	0	4.69766	3.16501e-209
AT3G56710	SIB1	sigma factor binding protein 1	Sig1 binding protein; interacts with Sig1R4. As well as Sig1, SibI is imported into chloroplasts and its expression is light-dependent in mature chloroplasts.	0	0	4.69658	2.55356e-148
AT2G15490	UGT73B4	UDP-glycosyltransferase 73B4		0	0	4.61716	5.39441e-204
AT5G39670	CML46		Calmodulin like protein involved in negative regulation of pattern triggered immunity.	0	0	4.58849	4.1571e-178
AT1G74710	EDS16	ENHANCED DISEASE SUSCEPTIBILITY TO ERYSIPHE ORONTII 16	Encodes a protein with isochorismate synthase activity. Mutants fail to accumulate salicylic acid. Its function may be redundant with that of ICS2 (AT1G18870).	0	0	4.54912	4.70089e-259
AT5G67340	PUB2		Plant U-box type E3 ubiquitin ligase (PUB).	0	0	4.52517	1.83312e-154
AT2G18690	AT2G18690			1.55557	1.42141e-21	4.51766	5.29168e-132
AT5G25930	AT5G25930			0	0	4.49078	1.12099e-294
AT5G10695	AT5G10695			0	0	4.46091	1.12042e-65
AT5G52640	HSP90.1	heat shock protein 90.1	Encodes a cytosolic heat shock protein AtHSP90.1. AtHSP90.1 interacts with disease resistance signaling components SGT1b and RAR1 and is required for RPS2-mediated resistance. The mRNA is cell-to-cell mobile.	0.905846	2.47403e-12	4.45241	5.09662e-275
AT5G39580	PRX62		Class III peroxidase cell wall-targeted protein localized to the micropylar endosperm facing the radicle. Involved in seed germination.	0.961529	1.09272e-13	4.44291	1.35205e-186
AT4G25810	XTR6	xyloglucan endotransglycosylase 6	xyloglucan endotransglycosylase-related protein (XTR6)	0	0	4.43059	8.7255e-142
AT1G51890	AT1G51890			0	0	4.37846	6.62696e-289
AT2G26560	PLA2A	phospholipase A 2A	Encodes a lipid acyl hydrolase with wide substrate specificity that accumulates upon infection by fungal and bacterial pathogens. Protein is localized in the cytoplasm in healthy leaves, and in membranes in infected cells. Plays a role in cell death and differentially affects the accumulation of oxylipins. Contributes to resistance to virus.	2.98557	2.19912e-24	4.37607	8.39486e-99
AT4G14630	GLP9	germin-like protein 9	germin-like protein with N-terminal signal sequence that may target it to the vacuole, plasma membrane and/or outside the cell. The mRNA is cell-to-cell mobile.	0	0	4.3727	1.56763e-72
AT5G60800	AtHMP53, HIPP3			0	0	4.3122	3.40317e-140
AT1G76650	CML38	calmodulin-like 38		0	0	4.29168	3.65171e-41
AT4G11890	ARCK1	ABA- AND OSMOTIC-STRESS-INDUCIBLE RECEPTOR-LIKE CYTOSOLIC KINASE1	Encodes a receptor-like cytosolic kinase ARCK1. Negatively controls abscisic acid and osmotic stress signal transduction.	0	0	4.27028	2.85781e-103
AT1G33960	AIG1	AVRRPT2-INDUCED GENE 1	Identified as a gene that is induced by avirulence gene avrRpt2 and RPS2 after infection with Pseudomonas syringae pv maculicola strain ES4326 carrying avrRpt2	0	0	4.2629	6.50756e-263
AT1G02920	GSTF7	glutathione S-transferase 7	Encodes glutathione transferase belonging to the phi class of GSTs. Naming convention according to Wagner et al. (2002).	0.891822	2.05991e-10	4.23068	1.05489e-162
AT3G47540	AT3G47540			0	0	4.23015	1.96317e-181
AT1G02930	GSTF6	glutathione S-transferase 6	Encodes glutathione transferase belonging to the phi class of GSTs. Naming convention according to Wagner et al. (2002).	1.07195	2.33815e-18	4.20396	5.29329e-152
AT5G02490	Hsp70-2			0	0	4.16624	2.49839e-287
AT4G11280	ACS6	1-aminocyclopropane-1-carboxylic acid (acc) synthase 6	encodes a a member of the 1-aminocyclopropane-1-carboxylate (ACC) synthase (S-adenosyl-L-methionine methylthioadenosine-lyase, EC 4.4.1.14) gene family The mRNA is cell-to-cell mobile.	0	0	4.16204	5.29347e-24
AT1G30730	AtBBE11			0	0	4.12963	3.56759e-93
AT1G67810	SUFE2	sulfur E2	Encodes a protein capable of stimulating the cysteine desulfurase activity of CpNifS (AT1G08490) in vitro. SufE2:GFP localizes to the chloroplasts where it is likely to play a role in iron-sulfur cluster assembly. Transcript levels for this gene are high in the pollen relative to other organs based on RT-PCR analysis. The mRNA is cell-to-cell mobile.	0	0	4.12454	2.35714e-121
AT1G65970	TPX2	thioredoxin-dependent peroxidase 2	thioredoxin-dependent peroxidase 2	0	0	4.0868	5.79732e-86
AT1G61820	BGLU46	beta glucosidase 46		2.02761	4.22526e-40	4.0482	3.06808e-210
AT3G51660	AT3G51660			0	0	4.0169	5.31655e-199
AT5G53450	ORG1	OBP3-responsive gene 1		3.28561	1.11838e-185	4.00767	7.24888e-167
AT2G15480	UGT73B5	UDP-glucosyl transferase 73B5		0	0	4.00708	8.56179e-173
AT1G17170	GSTU24	glutathione S-transferase TAU 24	Encodes glutathione transferase belonging to the tau class of GSTs. Naming convention according to Wagner et al. (2002). It is involved in the detoxification of the environmental pollutant 2,4,6-trinitrotoluene. Arabidopsis plants over-expressing At1g17170 were more resistant to TNT, removed more TNT from sterile and soil-based media, and had reduced levels of glutathione when grown in the presen…	0	0	4.00109	5.88658e-106
AT3G52400	SYP122	syntaxin of plants 122	syntaxin protein, involved in the negative regulation of defense pathways such as programmed cell death, salicylic acid signalling pathway, jasmonic acid signalling pathway	2.30664	8.31835e-81	3.99924	2.1918e-58
AT5G05250	AT5G05250			2.75979	9.79596e-110	3.9457	6.67322e-84
AT4G17490	ERF6	ethylene responsive element binding factor 6	Encodes a member of the ERF (ethylene response factor) subfamily B-3 of ERF/AP2 transcription factor family (ATERF-6). The protein contains one AP2 domain. There are 18 members in this subfamily including ATERF-1, ATERF-2, AND ATERF-5. It is involved in the response to reactive oxygen species and light stress. Involved in regulating root architecture and the response to cold stress.	0	0	3.91605	1.57632e-20
AT4G20830	AtBBE19, AtBBE20, OGOX1		Encodes an oligogalacturonide oxidase that inactivates the elicitor-active oligogalacturonides (OGs). It is involved in plant immunity. Overexpressing plants are more resistant to B. cinerea.	0.937899	1.20342e-14	3.91162	2.18948e-161
AT5G13200	GER5		Encodes a protein with unknown function that is involved in hormone mediated regulation of seed germination/dormancy.	0	0	3.88423	2.27238e-159
AT4G01870	AT4G01870			0.967795	9.59781e-22	3.88041	5.27623e-187
AT3G02550	LBD41	LOB domain-containing protein 41		0	0	3.86858	7.43014e-213
AT5G22300	NIT4	nitrilase 4	encodes a nitrilase isomer. The purified enzyme shows a strong substrate specificity for beta-cyano-L-alanine, a intermediate product of the cyanide detoxification pathway. The mRNA is cell-to-cell mobile.	0	0	3.85002	1.87602e-197
AT1G59590	ZCF37		ZCF37 mRNA, complete cds The mRNA is cell-to-cell mobile.	0	0	3.82195	3.76104e-78
AT2G38470	WRKY33	WRKY DNA-binding protein 33	Member of the plant WRKY transcription factor family. Regulates the antagonistic relationship between defense pathways mediating responses to P. syringae and necrotrophic fungal pathogens. Located in nucleus. Involved in response to various abiotic stresses - especially salt stress. Regulates cytochrome P450 gene CYP94B1 to control apoplastic barrier formation in roots to confer salt tolerance.	2.22213	5.31272e-66	3.82038	7.4071e-207
AT4G21390	B120			0	0	3.82004	4.9089e-149
AT3G14050	RSH2	RELA/SPOT homolog 2	Involved in the maintenance of the (p)ppGp level to accustom plastidial gene expression to darkness.	1.95315	5.46638e-76	3.80079	1.30406e-168
AT1G62300	WRKY6		Encodes a transcription factor WRKY6. Regulates Phosphate1 (Pho1) expression in response to low phosphate (Pi) stress.	0	0	3.80067	6.53179e-194
AT3G60420	AT3G60420			0	0	3.78142	1.72188e-115
AT4G22530	AT4G22530			0	0	3.65407	8.99012e-121
AT1G35710	AT1G35710			0	0	3.64818	6.09068e-93
AT2G19190	FRK1	FLG22-induced receptor-like kinase 1	Encodes a receptor-like protein kinase that is involved in early defense signaling. Expression of this gene is strongly induced during leaf senescence. It is a target of the transcription factor AtWRKY6.	0	0	3.64551	1.71807e-207
AT1G72900	AT1G72900			1.87293	8.96499e-42	3.60111	3.09757e-223
AT1G14870	PCR2	PLANT CADMIUM RESISTANCE 2	PCR2 encodes a membrane protein involved in zinc transport and detoxification.	0.84999	1.20016e-13	3.59336	2.71675e-131
AT4G34150	AT4G34150			1.59471	2.76342e-51	3.55526	2.64199e-216
AT1G68620	AT1G68620			0	0	3.5419	1.1666e-148
AT1G22400	UGT85A1			0.983393	9.23145e-17	3.54161	1.98911e-140
AT2G05940	RIPK	RPM1-induced protein kinase	Encodes a receptor-like cytoplasmic kinase that phosphorylates the host target RIN4, leading to the activation of a plant innate immune receptor RPM1.	0	0	3.53281	9.35964e-204
AT1G07135	AT1G07135			0	0	3.52978	2.86089e-15
AT1G32940	SBT3.5			0	0	3.49437	1.19358e-115
AT5G06320	NHL3	NDR1/HIN1-like 3	encodes a protein whose sequence is similar to tobacco hairpin-induced gene (HIN1) and Arabidopsis non-race specific disease resistance gene (NDR1). Expression of this gene is induced by cucumber mosaic virus, spermine and Pseudomonas syringae pv. tomato DC3000. The gene product is localized to the plasma membrane.	1.62423	1.20581e-48	3.48826	1.72487e-56
AT3G11340	UGT76B1	UDP-dependent glycosyltransferase 76B1	Encodes a glucosyltransferase that conjugates isoleucic acid and modulates plant defense and senescence.	0	0	3.48662	3.61716e-162
AT3G56400	WRKY70	WRKY DNA-binding protein 70	Member of WRKY Transcription Factor; Group III. Function as activator of SA-dependent defense genes and a repressor of JA-regulated genes. WRKY70-controlled suppression of JA-signaling is partly executed by NPR1.	0	0	3.47396	5.50872e-199
AT3G63380	ACA12			0.977867	6.84068e-14	3.45966	1.75798e-178
AT1G74310	HSP101	heat shock protein 101	Encodes ClpB1, which belongs to the Casein lytic proteinase/heat shock protein 100 (Clp/Hsp100) family. Involved in refolding of proteins which form aggregates under heat stress. Also known as AtHsp101. AtHsp101 is a cytosolic heat shock protein required for acclimation to high temperature.	0	0	3.45131	8.27748e-137
AT3G18290	BTS	BRUTUS	Encodes BRUTUS (BTS), a putative E3 ligase protein with metal ion binding and DNA binding domains, which negatively regulates the response to iron deficiency. The mRNA is cell-to-cell mobile.	2.78328	1.92405e-128	3.45049	2.73554e-166
AT2G39518	CASPL4D2			0	0	3.45048	4.6417e-130
AT1G66880	AT1G66880			0	0	3.44799	8.2201e-189
AT1G27730	STZ	salt tolerance zinc finger	Related to Cys2/His2-type zinc-finger proteins found in higher plants. Compensated for a subset of calcineurin deficiency in yeast. Salt tolerance produced by ZAT10 appeared to be partially dependent on ENA1/PMR2, a P-type ATPase required for Li+ and Na+ efflux in yeast. The protein is localized to the nucleus, acts as a transcriptional repressor and is responsive to chitin oligomers. Also involv…	2.20821	1.90925e-102	3.43786	1.84348e-17
AT5G05730	ASA1	anthranilate synthase alpha subunit 1	ASA1 encodes the alpha subunit of anthranilate synthase, which catalyzes the rate-limiting step of tryptophan synthesis. ASA1 is induced by ethylene, and forms a link between ethylene signalling and auxin synthesis in roots.	1.6208	3.50899e-55	3.4248	3.19207e-132
AT1G21250	WAK1	cell wall-associated kinase	Encodes a cell wall-associated kinase that interacts with AtGRP3 and may function as a signaling receptor of extracellular matrix component such as oligogalacturonides. The mRNA is cell-to-cell mobile.	0	0	3.41884	3.84574e-67
AT2G04040	DTX1	detoxification 1	AtDTX1 (At2g04040) has been identified as a detoxifying efflux carrier for plant-derived antibiotics and other toxic compounds, including Cd2+. Expression in rosette leaves is activated by high concentration of boron.Mistakenly referred to as At2g04070 in PMID:11739388.	0	0	3.38459	4.68393e-121
AT3G43190	SUS4	sucrose synthase 4	Encodes a protein with sucrose synthase activity (SUS4).	0	0	3.36641	4.68977e-54
AT3G52430	PAD4	PHYTOALEXIN DEFICIENT 4	Encodes a lipase-like gene that is important for salicylic acid signaling and function in resistance (R) gene-mediated and basal plant disease resistance. PAD4 can interact directly with EDS1, another disease resistance signaling protein. Expressed at elevated level in response to green peach aphid (GPA) feeding, and modulates the GPA feeding-induced leaf senescence through a mechanism that doesn…	0	0	3.36489	5.47438e-167
AT5G08790	ATAF2		induced by wounding, belongs to a large family of putative transcriptional activators with NAC domain.	1.39657	2.57731e-39	3.36276	3.46107e-153
AT4G33070	AtPDC1, PDC1			0	0	3.35805	7.70944e-51
AT3G25610	ALA10		Encodes aminophospholipid ATPase10 (ALA10), a P4-type ATPase flippase that internalizes exogenous phospholipids across the plasma membrane.	0	0	3.33508	1.30738e-224
AT1G07000	EXO70B2	exocyst subunit exo70 family protein B2	A member of EXO70 gene family, putative exocyst subunits, conserved in land plants. Arabidopsis thaliana contains 23 putative EXO70 genes, which can be classified into eight clusters on the phylogenetic tree.	0	0	3.33095	3.14694e-208
AT1G25400	AT1G25400			0.894151	2.00478e-12	3.32962	2.48676e-92
AT1G02360	AT1G02360			0	0	3.32887	5.29878e-84
AT5G41740	AT5G41740			0	0	3.32595	4.71782e-103
AT5G13740	ZIF1	zinc induced facilitator 1	Encodes ZIF1 (ZINC-INDUCED FACILITATOR1), a member of the Major Facilitator Superfamily (MFS) of membrane proteins which are found in all organisms and transport a wide range of small, organic molecules. Involved in a mechanism of Zn sequestration, possibly by transport of a Zn ligand or Zn-ligand complex into vacuoles. The mRNA is cell-to-cell mobile.	2.43815	1.194e-133	3.32039	1.07387e-138
AT3G12580	HSP70	heat shock protein 70		1.01019	1.44496e-12	3.31357	3.66864e-94
AT4G39030	EDS5	ENHANCED DISEASE SUSCEPTIBILITY 5	Encodes an orphan multidrug and toxin extrusion transporter. Essential component of salicylic acid-dependent signaling for disease resistance. Member of the MATE-transporter family. Expression induced by salicylic acid. Mutants are salicylic acid-deficient.	0	0	3.31092	2.35648e-180
AT4G39950	CYP79B2	cytochrome P450, family 79, subfamily B, polypeptide 2	Belongs to cytochrome P450 and is involved in tryptophan metabolism. Converts Trp to indo-3-acetaldoxime (IAOx), a precursor to IAA and indole glucosinolates. The mRNA is cell-to-cell mobile.	2.13336	9.92306e-61	3.30507	5.61946e-125
AT1G30755	PSI2			0	0	3.2989	2.45681e-141
AT4G34390	XLG2	extra-large GTP-binding protein 2		0	0	3.2977	5.70018e-209
AT4G23190	CRK11	cysteine-rich RLK (RECEPTOR-like protein kinase) 11	Encodes putative receptor-like protein kinase that is induced by the soil-borne vascular bacteria, Ralstonia solanacearum. Naming convention from Chen et al 2003 (PMID 14756307)	0	0	3.28031	2.74259e-180
AT1G76970	AT1G76970			0	0	3.26715	3.02322e-86
AT1G77120	ADH1	alcohol dehydrogenase 1	Catalyzes the reduction of acetaldehyde using NADH as reductant. Requires zinc for activity. Dimer. Anaerobic response polypeptide (ANP). Fermentation. The protein undergoes thiolation following treatment with the oxidant tert-butylhydroperoxide. The mRNA is cell-to-cell mobile.	-0.952735	6.88737e-06	3.23839	2.52528e-17
AT4G12720	NUDT7		Encodes a protein with ADP-ribose hydrolase activity. Negatively regulates EDS1-conditioned plant defense and programmed cell death.	1.43077	1.63382e-47	3.21519	3.56655e-178
AT2G23170	GH3.3		encodes an IAA-amido synthase that conjugates Asp and other amino acids to auxin in vitro.	1.25546	1.15139e-20	3.20334	1.20495e-146
AT2G40140	CZF1			1.90972	7.70472e-78	3.20004	1.70732e-69
AT3G15500	NAC3	NAC domain containing protein 3	Encodes an ATAF-like NAC-domain transcription factor that doesn't contain C-terminal sequences shared by CUC1, CUC2 and NAM. Note: this protein (AtNAC3) is not to be confused with the protein encoded by locus AT3G29035, which, on occasion, has also been referred to as AtNAC3. The mRNA is cell-to-cell mobile.	0	0	3.19706	7.79086e-98
AT1G15040	GAT1_2.1	glutamine amidotransferase 1_2.1	Encodes a nitrogen regulated putative glutamine amidotransferase that represses shoot branching.	-1.39899	3.56628e-26	3.188	2.56717e-40
AT5G13190	GILP	GSH-induced LITAF domain protein	Encodes a plasma membrane localized LITAF domain protein that interacts with LSD1 and acts as a negative regulation of hypersensitive cell death.	0	0	3.17608	4.91659e-157
AT5G52810	SARD4		SAR-DEFICIENT4 (SARD4) alias ORNITHINE CYCLODEAMINASE/m-CRYSTALLIN (ORNCD1) is involved in the biosynthesis of pipecolic acid. The reductase converts dehydropipecolic acid intermediates generated from L-Lysine by AGD2-LIKE DEFENSE RESPONSE PROTEIN1 (ALD1) to pipecolic acid (PMID:28330936).	0	0	3.17482	3.03177e-149
AT4G33050	EDA39	embryo sac development arrest 39	Encodes a calmodulin-binding protein involved in stomatal movement.	1.04657	2.37738e-18	3.17312	6.58661e-166
AT3G26840	PES2	phytyl ester synthase 2	Encodes a protein with phytyl ester synthesis and diacylglycerol acyltransferase activities that is involved in the deposition of free phytol and free fatty acids in the form of phytyl esters in chloroplasts, a process involved in maintaining the integrity of the photosynthetic membrane during abiotic stress and senescence.	0	0	3.16894	6.3653e-66
AT2G03760	SOT12	sulphotransferase 12	Encodes a brassinosteroid sulfotransferase. In vitro experiements show that this enzyme has a preference for 24-epibrassinosteroids, particularly 24-epicathasterone, but does not act on castasterone and brassinolide. It also shows sulfating activity toward flavonoids. It is differentially expressed during development, being more abundant in young seedlings and actively growing cell cultures. Expr…	0	0	3.16095	5.87803e-85
AT2G13790	SERK4	somatic embryogenesis receptor-like kinase 4		1.33026	4.73931e-31	3.13655	5.62695e-176
AT4G17500	ERF-1	ethylene responsive element binding factor 1	Encodes a member of the ERF (ethylene response factor) subfamily B-3 of ERF/AP2 transcription factor family (ATERF-1). The protein contains one AP2 domain. There are 18 members in this subfamily including ATERF-1, ATERF-2, AND ATERF-5. The mRNA is cell-to-cell mobile.	1.40027	1.05139e-30	3.12707	9.66852e-121
AT4G33920	APD5			0	0	3.1268	4.41051e-141
AT5G51830	FRK1, FRK7		Encodes one of the several Arabidopsis fructokinases. Nomenclature according to Riggs 2017 has been adopted for the family by the community (personal communication, Boernke, Callis, Granot, Boernke, and Smeekens). Important for seed oil accumulation and vascular development.	0.737419	5.51377e-09	3.12666	5.75242e-153
AT2G41100	TCH3	TOUCH 3	encodes a calmodulin-like protein, with six potential calcium binding domains. Calcium binding shown by Ca(2+)-specific shift in electrophoretic mobility. Expression induced by touch and darkness. Expression may also be developmentally controlled. Expression in growing regions of roots, vascular tissue, root/shoot junctions, trichomes, branch points of the shoot, and regions of siliques and flowe…	1.18422	2.35447e-21	3.12292	6.77006e-130
AT2G18670	ATL56			0	0	3.11773	1.80758e-85
AT5G26340	MSS1		Encodes a protein with high affinity, hexose-specific/H+ symporter activity. The activity of the transporter appears to be negatively regulated by phosphorylation. Importantly, microarray analysis, as well as the study of the expression of this gene in mutants involved in programmed cell death (PCD) demonstrated a tight correlation between this gene's expression and PCD.	0.465763	2.367e-05	3.10377	1.06165e-107
AT5G04340	ZAT6	zinc finger of Arabidopsis thaliana 6	Encodes a C2H2 zinc finger transcription factor that coordinately activates phytochelatin-synthesis related gene expression and directly targets GSH1 by binding to its promoter to positively regulate Cd accumulation and tolerance.	1.53265	9.96047e-25	3.09218	4.66834e-70
AT5G35735	AT5G35735			1.44642	1.5196e-30	3.08385	5.80024e-140
AT1G64400	LACS3	long-chain acyl-CoA synthetase 3		0	0	3.08369	5.05113e-86
AT5G39050	PMAT1	phenolic glucoside malonyltransferase 1	Encodes a malonyltransferase that may play a role in phenolic xenobiotic detoxification.	1.10267	8.43822e-18	3.07528	1.31648e-126
AT1G64660	MGL	methionine gamma-lyase	Encodes a functional methionine gamma-lyase, a cytosolic enzyme catalyzes the degradation of methionine into methanethiol, alpha-ketobutyrate and ammonia. The catabolism of excess methionine is important to methionine homeostasis. The mRNA is cell-to-cell mobile.	0	0	3.07106	2.48772e-134
AT4G37390	BRU6		Encodes an IAA-amido synthase that conjugates Asp and other amino acids to auxin in vitro. Lines carrying insertions in this gene are hypersensitive to auxin. May function as a negative component in auxin signaling by regulating auxin activity.	1.34141	7.44047e-22	3.06988	1.29607e-116
AT5G61900	BON1	BONZAI 1	Encodes a plasma-membrane localized, copine-like protein, which is a member of a newly identified class of calcium-dependent, phospholipid binding proteins that are present in a wide range of organisms. Mutants exhibit temperature-sensitive growth defects and increased hypersensitive response where permissive conditions are low temperature (22 degrees Celsius) and low humidity. Gene is expressed …	2.21419	1.98773e-63	3.06377	5.10844e-161
AT1G65690	NHL6		Encodes NHL6 (NDR1/HIN1-like 6). Plays an important role in the abiotic stresses-induced ABA signaling and biosynthesis, particularly during seed germination and early seedling development.	0	0	3.06217	4.71547e-58
AT1G19180	JAZ1	jasmonate-zim-domain protein 1	JAZ1 is a nuclear-localized protein involved in jasmonate signaling. JAZ1 transcript levels rise in response to a jasmonate stimulus. JAZ1 can interact with the COI1 F-box subunit of an SCF E3 ubiquitin ligase in a yeast-two-hybrid assay only in the presence of jasmonate-isoleucine (JA-ILE) or coronatine. Application of jasmonate methyl ester to Arabidopsis roots reduces the levels of a JAZ1:GUS …	1.55028	2.08165e-41	3.05203	7.21847e-112
AT5G58120	DM10		DM10 is a singleton TIR-NLR, and causal QTL responsible for severe hybrid necrosis.	0	0	3.0245	1.51741e-90
AT1G30720	AtBBE10			-0.88857	1.96531e-05	3.00218	1.39084e-132
AT1G25220	ASB1	anthranilate synthase beta subunit 1	Catalyzes the first step of tryptophan biosynthesis: Chorismate L-Glutamine = Anthranilate Pyruvate L-Glutamate. Functions as a heterocomplex with anthranilate synthase alpha subunit (ASA1 or ASA2).	1.62788	6.17982e-35	2.99561	2.3122e-127
AT2G16060	HB1	hemoglobin 1	Encodes a class 1 nonsymbiotic hemoglobin induced by low oxygen levels with very high oxygen affinity. It is not likely to be a hemoglobin transporter because of its extremely high affinity for oxygen. Overexpression impairs cold stress-induced nitric oxide (NO) production.	0	0	2.98412	3.59135e-115
AT4G39640	GGT1	gamma-glutamyl transpeptidase 1	The gene encodes a gamma-glutamyltransferase (AKA gamma-glutamyl transpeptidase, EC 2.3.2.2) that is located in vascular tissues (predominantly phloem) of leaves and is involved in the degradation of glutathione. The encoded enzyme also mitigates oxidative stress by metabolizing GSSG (oxidized form of GSH - glutathione) in the apoplast.	0	0	2.97459	4.68971e-178
AT1G28190	AT1G28190		PADRE protein up-regulated after infection by S. sclerotiorum.	0	0	2.95277	3.34221e-101
AT1G03220	SAP2			0.535812	1.16555e-06	2.93705	3.55197e-104
AT1G30620	MUR4	MURUS 4	encodes a type-II membrane protein that catalyzes 4-epimerization of UDP-D-Xylose to UDP-L-Arabinose in vitro, the nucleotide sugar used by glycosyltransferases in the arabinosylation of cell wall polysaccharides and wall-resident proteoglycans.	0	0	2.93597	9.3799e-91
AT1G23020	FRO3	ferric reduction oxidase 3	Encodes a ferric chelate reductase whose transcription is regulated by FIT1. Expressed in the root, shoot, flower and cotyledon.	1.81347	1.73052e-59	2.92793	4.04358e-141
AT4G27450	AT4G27450			0.39605	0.000529891	2.92541	6.30205e-96
AT4G29780	AT4G29780		Expression of the gene is affected by multiple stresses. Knockout and overexpression lines show no obvious phenotypes.	0	0	2.9211	2.98822e-11
AT1G23710	AT1G23710			0	0	2.9159	1.58808e-74
AT1G10700	PRS3	phosphoribosyl pyrophosphate (PRPP) synthase 3	Encodes a P-independent phosphoribosyl pyrophosphate (PRPP) synthase.	0	0	2.91237	1.34677e-128
AT5G61160	AACT1	anthocyanin 5-aromatic acyltransferase 1		3.56127	9.59204e-49	2.91217	1.7219e-42
AT5G42050	NRP		Stress responsive asparagine-rich protein. Binds to PevD (Verticillium dahliae ) fungal effector protein. NRP interacts with CRY2, leading to increased cytoplasmic accumulation of CRY2 in a blue light-independent manner (PMID:28633330).NRP also binds FyPP3 and recruits it to endosomes and thus targets it for degradation.	1.38698	9.79344e-37	2.9108	6.8827e-119
AT3G28930	AIG2	AVRRPT2-INDUCED GENE 2	avrRpt2-induced gene that exhibits RPS2- and avrRpt2-dependent induction early after infection with Pseudomonas syringae pv maculicola strain ES4326 carrying avrRpt2	2.0208	1.33766e-32	2.9051	6.88053e-96
AT1G43910	AT1G43910			0	0	2.90502	3.01087e-54
AT3G09350	Fes1A	Fes1A	Encodes one of the Arabidopsis orthologs of the human Hsp70-binding protein 1 (HspBP-1) and yeast Fes1p: Fes1A (AT3G09350), Fes1B (AT3G53800), Fes1C (AT5G02150). Fes1A is cytosolic and associates with cytosolic Hsp70. Mutants showed increased heat-sensitive phenotype suggestion the involvement of Fes1A in acquired thermotolerance. Does not have nucleotide exchange factor activity in vitro.	0	0	2.90209	8.3907e-94
AT5G06860	PGIP1	polygalacturonase inhibiting protein 1	Encodes a polygalacturonase inhibiting protein involved in defense response. PGIPs inhibit the function of cell wall pectin degrading enzymes such as those produced by fungal pathogens. PGIP1 is induced by fungal infection. Suppressed in the proton sensitive stop1-mutant, but the transcription level was recovered by transformation of STOP2. Knockout mutant showed severe damage in the root tip in …	0.588019	3.9892e-09	2.89478	2.24631e-98
AT5G19240	AT5G19240			1.99648	1.52753e-49	2.88749	5.96426e-116
AT3G44720	ADT4	arogenate dehydratase 4	Encodes a plastid-localized arogenate dehydratase involved in phenylalanine biosynthesis. Not less than six genes encoding ADT were identi&#64257;ed in the Arabidopsis genome: ADT1 [At1g11790]; ADT2 [At3g07630]; ADT3 [At2g27820]; ADT4 [At3g44720]; ADT5 [At5g22630]; and ADT6 [At1g08250]. The mRNA is cell-to-cell mobile.	1.55423	1.77085e-38	2.88566	5.74441e-126
AT5G48540	AT5G48540			0	0	2.87768	3.74975e-114
AT1G57990	PUP18	purine permease 18	Member of a family of proteins related to PUP1, a purine transporter. May be involved in the transport of purine and purine derivatives such as cytokinins, across the plasma membrane.	1.85013	2.74277e-27	2.87131	2.07651e-91
AT2G15390	FUT4	fucosyltransferase 4	Encodes an alpha-(1,2)-fucosyltransferase.	0	0	2.87047	2.65039e-97
AT1G18570	MYB51	myb domain protein 51	Encodes a member of the R2R3-MYB transcription family. Involved in indole glucosinolate biosynthesis. The mRNA is cell-to-cell mobile.	1.87421	1.6867e-25	2.86226	2.67187e-119
AT2G36950	AtHMP20			1.16296	6.08169e-23	2.85875	7.387e-155
AT5G61210	SNAP33	soluble N-ethylmaleimide-sensitive factor adaptor protein 33	membrane localized t-SNARE SNAP25 homologue, probably involved in cytokinesis and cell plate formation The mRNA is cell-to-cell mobile.	0.923057	9.23223e-13	2.85613	1.03683e-159
AT3G22370	AOX1A	alternative oxidase 1A	Encodes AOX1a, an isoform of alternative oxidase that is expressed in rosettes, flowers, and root. The alternative oxidase of plant mitochondria transfers electrons from the ubiquinone pool to oxygen without energy conservations. It is regulated through transcriptional control and by pyruvate. Plays a role in shoot acclimation to low temperature. Also is capable of ameliorating reactive oxygen sp…	0	0	2.84889	9.73158e-134
AT1G42990	BZIP60	basic region/leucine zipper motif 60	bZIP60 consists of a bZIP DNA binding domain followed by a putative transmembrane domain. bZIP60 mRNA is upregulated by the addition of ER stress inducers, tunicamycin (inhibitor of N-linked glycosylation), DTT (inhibitor of disulfide bond formation) and azetin-2-carboxylate (proline analog perturbing protein structure). Upon ER stress, bZIP60 mRNA is spliced by IRE1A and IRE1B to produce bZIP60-…	0	0	2.84885	2.02705e-155
AT5G18470	AT5G18470			0	0	2.84711	3.77655e-64
AT2G38860	YLS5		Encodes protease I (pfpI)-like protein YLS5.	0.735045	2.81766e-11	2.83735	1.93778e-119
AT5G27760	AtHIGD2			1.34732	1.91887e-14	2.83671	3.51478e-148
AT1G51820	SIF4			0	0	2.79884	2.19505e-77
AT3G26910	AT3G26910			0	0	2.79345	6.92127e-77
AT1G09070	SRC2	soybean gene regulated by cold-2	SRC2 specifically binds the peptide PIEPPPHH, and moves from ER to a vacuole fraction where it gets internalized. Involved in Protein Storage Vacuole targeting. The mRNA is cell-to-cell mobile.	1.27015	1.43334e-31	2.79139	1.1877e-74
AT5G61560	PUB51		Plant U-box type E3 ubiquitin ligase (PUB).	0	0	2.76718	4.3344e-76
AT5G07010	ST2A	sulfotransferase 2A	Encodes a sulfotransferase that acts specifically on 11- and 12-hydroxyjasmonic acid. Transcript levels for this enzyme are increased by treatments with jasmonic acid (JA), 12-hydroxyJA, JA-isoleucine, and 12-oxyphytodienoic acid (a JA precursor).	0	0	2.7577	9.32938e-55
AT3G09830	PBL39, PCRK1		Encodes a member of subfamily VIIa of the receptor-like cytoplasmic kinases (RLCKs). It contributes to pattern-triggered immunity in response to P. syringae.	0	0	2.75147	1.11966e-81
AT3G44300	NIT2	nitrilase 2	Encodes an enzyme that catalyzes the hydrolysis of indole-3-acetonitrile (IAN) to indole-3-acetic acid (IAA) (nitrile aminohydrolase, EC 3.5.5.1) and IAN to indole-3-acetamide (IAM) at lower levels. Mutants have reduced sensitivity to IAN and are sensitive to IAA. This enzyme likely participates in other non-auxin-related metabolic pathways. The mRNA is cell-to-cell mobile.	0	0	2.74504	2.89239e-90
AT1G05560	UGT75B1	UDP-glucosyltransferase 75B1	A UDP-glucose transferase localized in the phragmoplast. It has been co-purified with the callose synthase complex and may transfer UDP-glucose from sucrose synthase to the callose synthase and thus help form a substrate channel for the synthesis of callose at the forming cell plate. Induced by salicylic acid. Independent of NPR1 for their induction by salicylic acid. UGT1 encodes a protein with …	1.34722	5.96259e-21	2.73519	1.05402e-95
AT2G24180	CYP71B6	cytochrome p450 71b6	Encodes a cytochrome P450 monooxygenase that converts indole-3-acetonitrile to indole-3-aldehyde / indole-3-carboxylic acid and cyanide. The mRNA is cell-to-cell mobile.	0	0	2.73407	2.61156e-152
AT3G23550	DTX18			2.14463	3.79243e-37	2.72707	3.49631e-80
AT3G46280	AT3G46280			-1.00904	8.86888e-18	2.72013	8.56557e-82
AT2G29420	GSTU7	glutathione S-transferase tau 7	Encodes glutathione transferase belonging to the tau class of GSTs. Naming convention according to Wagner et al. (2002). Induced by Salicylic acid. Independent of NPR1 for their induction by salicylic acid.	0	0	2.71576	6.80061e-116
AT1G10340	AT1G10340			0	0	2.71412	4.59369e-73
AT2G04400	IGPS		Acts during tryptophan biosynthesis controlled by ERF109.	0.964201	2.75369e-14	2.7129	1.08847e-78
AT3G11820	SYP121	syntaxin of plants 121	Encodes a syntaxin localized at the plasma membrane. SYR1/PEN1 is a member of the SNARE superfamily and functions in positioning anchoring of the KAT1 K+ channel protein at the plasma membrane. Transcription is upregulated by abscisic acid, suggesting a role in ABA signaling. Also functions in non-host resistance against barley powdery mildew. It is a nonessential component of the preinvasive res…	1.36545	1.70635e-30	2.70914	2.09951e-129
AT1G72680	CAD1	cinnamyl-alcohol dehydrogenase		0	0	2.70467	1.12885e-128
AT3G54640	TSA1	tryptophan synthase alpha chain	Catalyzes the conversion of indole-3-glycerolphosphate to indole, the penultimate reaction in the biosynthesis of tryptophan. Functions as a heterocomplex with tryptophan synthase beta subunit (TSA2).	0.991718	5.59445e-20	2.69931	1.86445e-74
AT5G45110	NPR3	NPR1-like protein 3	Encodes NPR3, a paralog of NPR1. Involved in negative regulation of defense responses against bacterial and oomycete pathogens. npr3 mutants has elevated level of PR1 expression. Interacts with TGA2, TGA3, TGA5 and TGA6 in yeast two hybrid assays. NPR3 and NPR4 are receptors for the immune signal salicylic acid. The mRNA is cell-to-cell mobile.	1.44923	3.12048e-31	2.68482	1.19744e-161
AT5G47910	RBOHD	respiratory burst oxidase homologue D	NADPH/respiratory burst oxidase protein D (RbohD).Interacts with AtrbohF gene to fine tune the spatial control of ROI production and hypersensitive response to cell in and around infection site. The mRNA is cell-to-cell mobile.	2.06745	3.04103e-56	2.68311	9.43813e-134
AT2G36220	AT2G36220			0.86526	7.64387e-18	2.68233	2.29872e-106
AT4G34135	UGT73B2	UDP-glucosyltransferase 73B2	The At4g34135 gene encodes a flavonol 7-O-glucosyltransferase (EC 2.4.1.237) that glucosylates also with a 20 fold lower activity flavonols (kaempferol and quercetin) at the 3-O-position.	0	0	2.67946	1.45248e-128
AT2G23810	TET8	tetraspanin8	Member of TETRASPANIN family	1.48541	1.56113e-30	2.6704	3.22912e-62
AT4G02520	GSTF2	glutathione S-transferase PHI 2	Encodes glutathione transferase belonging to the phi class of GSTs. Naming convention according to Wagner et al. (2002). The expression of this gene is upregulated by herbicide safeners such as benoxacor and fenclorim.	0.882511	7.58873e-09	2.6702	8.57333e-90
AT4G30280	XTH18	xyloglucan endotransglucosylase/hydrolase 18	Encodes a xyloglucan endotransglucosylase/hydrolase with only only the endotransglucosylase (XET; EC 2.4.1.207) activity towards xyloglucan and non-detectable endohydrolytic (XEH; EC 3.2.1.151) activity. Expressed in the mature or basal regions of both the main and lateral roots, but not in the tip of these roots where cell division occurs.	1.08231	8.82033e-25	2.64977	9.66584e-57
AT5G54810	TSB1	tryptophan synthase beta-subunit 1	A.thaliana tryptophan synthase beta subunit (trpB)	1.43793	1.83656e-35	2.6483	1.19185e-87
AT4G27280	CMI1		EF-hand Ca2 + -binding protein, which is a Ca2+-dependent transducer of auxin-regulated gene expression and interacts with ICR1.	0	0	2.64382	3.60353e-11
AT2G31880	SOBIR1	SUPPRESSOR OF BIR1 1	Encodes a putative leucine rich repeat transmembrane protein that is expressed in response to Pseudomonas syringae. Expression of SRRLK may be required for silencing via lsiRNAs. Regulates cell death and innate immunity.	0.939666	2.85891e-12	2.6407	4.04936e-118
AT5G57560	TCH4	Touch 4	Encodes a cell wall-modifying enzyme, rapidly upregulated in response to environmental stimuli.	0.591493	0.000195343	2.63015	2.84847e-48
AT4G19520	AT4G19520			0	0	2.62705	2.01237e-134
AT1G60730	AT1G60730			0.973693	1.16201e-14	2.62607	3.40243e-90
AT1G69890	DUF569		Encodes a member of a conserved DUF domain family that is induced by NO. Based on mutant phenotype may be involved in NO stress response.	0	0	2.62358	3.4973e-77
AT5G24530	DMR6	DOWNY MILDEW RESISTANT 6	Encodes a putative 2OG-Fe(II) oxygenase that is defense-associated but required for susceptibility to downy mildew. The mRNA is cell-to-cell mobile.	0	0	2.62222	1.26999e-77
AT1G13210	ACA.l	autoinhibited Ca2 /ATPase II	Autoinhibited Ca2+/ATPase II. ALA11 acts redundantly with ALA3, ALA4, ALA5, ALA9, ALA10 in root and shoot development as well as PIN trafficking and polarity .	1.58183	4.01837e-31	2.61255	9.67678e-138
AT1G51760	IAR3	IAA-ALANINE RESISTANT 3	encodes a member of the six Arabidopsis IAA-amino acid conjugate hydrolase subfamily and conjugates and conjugates IAA-Ala in vitro. Gene is expressed most strongly in roots, stems, and flowers. The mRNA is cell-to-cell mobile.	1.37748	1.14941e-37	2.61229	1.23964e-98
AT3G55470	AT3G55470			0	0	2.61149	4.71261e-53
AT2G01180	PAP1	phosphatidic acid phosphatase 1	Encodes phosphatidate phosphatase. Up-regulated by genotoxic stress (gamma ray or UV-B) and elicitor treatments with mastoparan and harpin. Expressed in roots and leaves.	0	0	2.60673	2.16143e-43
AT4G05020	NDB2	NAD(P)H dehydrogenase B2	Miitochondrial alternative NADH dehydrogenase.	0	0	2.6032	3.85358e-55
AT5G47220	ERF2	ethylene responsive element binding factor 2	Encodes a member of the ERF (ethylene response factor) subfamily B-3 of ERF/AP2 transcription factor family (ATERF-2). The protein contains one AP2 domain. Functions as activator of GCC box–dependent transcription. Positive regulator of JA-responsive defense genes and resistance to F. oxysporum and enhances JA inhibition of root elongation.	1.68404	3.10611e-40	2.59796	1.03171e-100
AT3G13080	ABCC3	ATP-binding cassette C3	encodes an ATP-dependent MRP-like ABC transporter able to transport glutathione-conjugates as well as chlorophyll catabolites. The expression of this gene is upregulated by herbicide safeners such as benoxacor and fenclorim.	1.16524	5.96259e-21	2.5842	4.04106e-110
AT3G21230	4CL5	4-coumarate:CoA ligase 5	The gene encodes a 4-coumarate coenzyme A ligase being able to use sinapate as substrate. The catalytic efficiency was in the following (descending) order: p-coumaric acid, caffeic acid, 5-OH-ferulic acid, ferulic acid and sinapic acid. At4CL5 was unable to use cinnamic acid as substrate. Knockout of At4CL5 (4cl5) revealed no effect on syringyl lignin content indicating that the activity observed…	0	0	2.58043	2.55744e-61
AT1G10140	AT1G10140			0	0	2.57492	1.66186e-90
AT3G22060	AT3G22060		contains Pfam profile: PF01657 Domain of unknown function that is usually associated with protein kinase domain Pfam:PF00069, however this protein does not have the protein kinase domain	0.415811	0.00293228	2.57454	2.44454e-90
AT5G08240	AT5G08240			0	0	2.56889	2.20996e-62
AT2G30140	UGT87A2	UDP-glucosyl transferase 87A2	Encodes a putative glycosyltransferase. Regulates flowering time via FLOWERING LOCUS C.	0.925366	3.53079e-13	2.56779	2.0026e-113
AT2G29720	CTF2B		Encodes CTF2B.	0	0	2.56583	3.44808e-65
AT5G17380	AT5G17380			1.02113	2.51866e-22	2.55723	1.3926e-90
AT2G39200	MLO12	MILDEW RESISTANCE LOCUS O 12	A member of a large family of seven-transmembrane domain proteins specific to plants, homologs of the barley mildew resistance locus o (MLO) protein. The Arabidopsis genome contains 15 genes encoding MLO proteins, with localization in plasma membrane. Phylogenetic analysis revealed four clades of closely-related AtMLO genes. ATMLO6 belongs to the clade IV, with AtMLO2, AtMLO3 and AtMLO12. The gen…	0	0	2.55275	6.94135e-84
AT5G03610	AT5G03610		GDSL-motif esterase/acyltransferase/lipase. Enzyme group with broad substrate specificity that may catalyze acyltransfer or hydrolase reactions with lipid and non-lipid substrates.	0	0	2.54186	1.14045e-117
AT2G32150	AT2G32150			0.608223	1.7084e-07	2.54147	3.26304e-88
AT2G30550	DALL3		Encodes a lipase that hydrolyzes phosphatidylcholine, glycolipids as well as triacylglycerols.	0	0	2.52734	2.23764e-62
AT5G38200	AT5G38200			0	0	2.52405	3.17778e-61
AT5G67370	CGLD27	CONSERVED IN THE GREEN LINEAGE AND DIATOMS 27		2.30052	2.05168e-74	2.52018	3.88369e-75
AT3G14620	CYP72A8	cytochrome P450, family 72, subfamily A, polypeptide 8	putative cytochrome P450 The mRNA is cell-to-cell mobile.	0	0	2.50209	3.00437e-69
AT4G02380	SAG21	senescence-associated gene 21	Encodes AtLEA5 (late embryogenesis abundant like protein). Also known as SENESCENCE-ASSOCIATED GENE 21 (SAG21). Has a role on oxidative stress tolerance. mRNA levels are elevated in response to various stresses.	1.26697	2.06873e-18	2.50187	8.95488e-94
AT5G07440	GDH2	glutamate dehydrogenase 2	Encodes the beta-subunit of the glutamate dehydrogenase. The enzyme is almost exclusively found in the mitochondria of stem and leaf companion cells.	-0.496296	7.72099e-06	2.494	1.06639e-93
AT3G47340	ASN1	glutamine-dependent asparagine synthase 1	encodes a glutamine-dependent asparagine synthetase, the predicted ASN1 peptide contains a purF-type glutamine-binding domain, and is expressed predominantly in shoot tissues, where light has a negative effect on its mRNA accumulation. Expression is induced within 3 hours of dark treatment, in senescing leaves and treatment with exogenous photosynthesis inhibitor. Induction of gene expression was…	-1.21175	1.20689e-14	2.48705	3.42452e-95
AT3G50480	HR4	homolog of RPW8 4	Homolog of RPW8	0	0	2.46606	1.41422e-82
AT4G24160	AT4G24160		Encodes a soluble lysophosphatidic acid acyltransferase with additional triacylglycerol lipase and phosphatidylcholine hydrolyzing enzymatic activities. Plays a pivotal role in maintaining the lipid homeostasis by regulating both phospholipid and neutral lipid levels.	0	0	2.46154	3.81403e-90
AT1G01720	ATAF1		Belongs to a large family of putative transcriptional activators with NAC domain. Transcript level increases in response to wounding and abscisic acid. ATAF1 attentuates ABA signaling and sythesis. Mutants are hyposensitive to ABA. The mRNA is cell-to-cell mobile.	0	0	2.4545	1.60703e-100
AT1G74100	SOT16	sulfotransferase 16	encodes a desulfoglucosinolate sulfotransferase, involved in the final step of glucosinolate core structure biosynthesis. Has a broad-substrate specificity with different desulfoglucosinolates, the best substrate is indole-3-methyl-dsGS, followed by benzyl-dsGS. Expression was induced by wounding, jasmonate and ethylene stimulates.	1.7157	6.16944e-51	2.44725	4.34057e-94
AT4G04960	LecRK-VII.1			0	0	2.4375	4.76095e-69
AT3G09440	AT3G09440			0	0	2.43652	5.36356e-87
AT2G40000	HSPRO2	ortholog of sugar beet HS1 PRO-1 2		1.12632	5.26159e-20	2.43025	1.71711e-67
AT5G14730	AT5G14730		Unknown protein, expression induced by IDL7 and stress.	0	0	2.42925	2.26127e-70
AT4G18950	BHP		BHP1 is a Raf-like protein kinase involved in mediating blue light dependent stomatal opening.	0.338556	0.0100614	2.42768	9.91679e-113
AT4G21830	MSRB7	methionine sulfoxide reductase B7		0.898353	2.01181e-12	2.42646	2.82914e-34
AT2G36690	GAS2, GIM2		Protein belonging to the Fe-dependent 2-oxoglutarate dioxygenase superfamily, catalyzes the stereospecific hydration of GA12 to produce DHGA12, negatively regulates ABA sensitivity during germination, phototrophic establishment and seedling development.	0	0	2.41766	1.17485e-100
AT2G16900	AT2G16900			0	0	2.41245	8.17622e-68
AT2G30250	WRKY25	WRKY DNA-binding protein 25	member of WRKY Transcription Factor; Group I. Located in nucleus. Involved in response to various abiotic stresses - especially salt stress.	0	0	2.41175	1.55896e-70
AT3G15356	AT3G15356			1.96768	1.55688e-22	2.40346	4.72238e-48
AT5G16910	CSLD2	cellulose-synthase like D2	encodes a gene similar to cellulose synthase. Located in Golgi membranes. The mRNA is cell-to-cell mobile.	0.976369	1.41219e-14	2.40307	8.71868e-90
AT2G17220	Kin3	kinase 3	Encodes a putative serine/threonine-specific protein kinase kin3. Protein is N-myristoylated.	0	0	2.39729	2.34908e-65
AT2G26530	AR781		Pheromone receptor-like protein involved in the early elicitor signaling events which occur within minutes and include ion fluxes across the plasma membrane, activation of MPKs and the formation of ROS related to PGPS1 and WRKY33.	1.78351	9.61556e-62	2.39284	4.27847e-51
AT2G28570	AT2G28570			0	0	2.39164	3.29666e-47
AT3G10500	NAC053	NAC domain containing protein 53	Encodes a transcriptional activator that is associated with the plasma membrane in a dormant form and is proteolytically cleaved to create a form that can enter the nucleus. It is thought to promote ROS production by binding directly to the promoters of genes encoding ROS biosynthetic enzymes during drought-induced leaf senescence. The mRNA is cell-to-cell mobile.	0	0	2.38881	1.93193e-62
AT2G23320	WRKY15	WRKY DNA-binding protein 15	Encodes WRKY DNA-binding protein 15 (WRKY15).	0	0	2.37178	5.36446e-115
AT2G18700	TPS11	trehalose phosphatase/synthase 11	Encodes an enzyme putatively involved in trehalose biosynthesis. The protein has a trehalose synthase (TPS)-like domain that may or may not be active as well as a trehalose phosphatase (TPP)-like domain.	0.449794	1.73723e-05	2.36672	5.57632e-73
AT1G29690	CAD1	constitutively activated cell death 1	Encodes a protein containing a domain with significant homology to the MACPF (membrane attack complex and perforin) domain of complements and perforin proteins that are involved in innate immunity in animals. Transgenic <i>cad1-1</i> mutant plants show lesions seen in the hypersensitive response, as well as a spontaneous activation of expression of pathogenesis-related genes and leading to a 32-f…	0	0	2.35803	2.75131e-61
AT4G21850	MSRB9	methionine sulfoxide reductase B9		0.999647	4.52132e-18	2.34443	8.43143e-60
AT3G16530	AT3G16530		Lectin like protein whose expression is induced upon treatment with chitin oligomers.	1.62783	8.69097e-25	2.33941	3.58091e-64
AT4G36500	AT4G36500			1.28195	1.85306e-31	2.33552	6.1878e-81
AT4G32480	AT4G32480			0.414634	0.00184886	2.33377	1.47573e-79
AT4G34131	UGT73B3	UDP-glucosyl transferase 73B3		0	0	2.33318	1.07467e-48
AT4G23700	CHX17	cation/H exchanger 17	member of Putative Na+/H+ antiporter family	0	0	2.33183	3.3301e-101
AT1G61560	MLO6	MILDEW RESISTANCE LOCUS O 6	A member of a large family of seven-transmembrane domain proteins specific to plants, homologs of the barley mildew resistance locus o (MLO) protein. The Arabidopsis genome contains 15 genes encoding MLO proteins, with localization in plasma membrane. Phylogenetic analysis revealed four clades of closely-related AtMLO genes. ATMLO6 belongs to the clade IV, with AtMLO2, AtMLO3 and AtMLO12. The gen…	0	0	2.32258	1.47933e-64
AT5G04930	ALA1	aminophospholipid ATPase 1	Encodes a putative aminophospholipid translocase (p-type ATPase) involved in chilling response. It is targeted to the plasma membrane following association in the endoplasmic reticulum with an ALIS protein beta-subunit. The mRNA is cell-to-cell mobile.	1.15792	9.55399e-24	2.31818	2.97635e-97
AT4G11850	PLDGAMMA1	phospholipase D gamma 1	Encodes a phospholipase D (gamma) that is involved in aluminum tolerance and plays a role in membrane lipid modulation under Al stress.	0.9568	3.76588e-13	2.31743	2.77394e-107
AT3G55430	AT3G55430			0.733145	3.44789e-11	2.30538	3.73382e-100
AT3G45140	LOX2	lipoxygenase 2	Chloroplast lipoxygenase required for wound-induced jasmonic acid accumulation in Arabidopsis.Mutants are resistant to Staphylococcus aureus and accumulate salicylic acid upon infection. The mRNA is cell-to-cell mobile.	1.67002	9.59781e-22	2.2977	1.05816e-16
AT4G23210	CRK13	cysteine-rich RLK (RECEPTOR-like protein kinase) 13	Encodes a Cysteine-rich receptor-like kinase (CRK13). Overexpression of CRK13 leads to hypersensitive response cell death, and induces defense against pathogens by causing increased accumulation of salicylic acid.	0	0	2.2953	2.37485e-60
AT1G22410	AT1G22410			0.572717	7.71988e-07	2.27331	4.37932e-75
AT4G16370	OPT3	oligopeptide transporter	Encodes a phloem-specific iron transporter that is essential for systemic iron signaling and redistribution of iron and cadmium. It loads iron into the phloem, facilitates iron recirculation from the xylem to the phloem, and regulates both shoot-to-root iron signaling and iron redistribution from mature to developing tissues.	2.17018	6.63137e-95	2.26942	2.05309e-74
AT3G05500	LDAP3, SRP3		Encodes a protein that associates with lipid droplet surfaces and shares sequence homology with family of small rubber particle proteins. The mRNA is cell-to-cell mobile.	0	0	2.25449	8.66214e-108
AT3G14990	DJ1A	DJ-1 homolog A	Encodes a homolog of animal DJ-1 superfamily protein. In the A. thaliana genome, three genes encoding close homologs of human DJ-1 were identified AT3G14990 (DJ1A), AT1G53280 (DJ1B) and AT4G34020 (DJ1C). Among the three homologs, DJ1C is essential for chloroplast development and viability. It exhibits glyoxalase activity towards glyoxal and methylglyoxal. The mRNA is cell-to-cell mobile.	0	0	2.24931	1.38883e-66
AT3G55980	SZF1	salt-inducible zinc finger 1		1.70935	3.15695e-60	2.24329	3.23982e-26
AT5G63790	NAC102	NAC domain containing protein 102	Encodes a member of the NAC family of transcription factors. ANAC102 appears to have a role in mediating response to low oxygen stress (hypoxia) in germinating seedlings. Its expression can be induced by beta-cyclocitral, an oxidized by-product of beta-carotene generated in the chloroplasts, mediates a protective retrograde response that lowers the levels of toxic peroxides and carbonyls, limitin…	0.84374	3.44475e-16	2.2362	5.84549e-99
AT2G35930	PUB23	plant U-box 23	Encodes a cytoplasmically localized U-box domain containing E3 ubiquitin ligase that is involved in the response to water stress and acts as a negative regulator of PAMP-triggered immunity.	1.22489	2.50649e-18	2.23185	1.5559e-23
AT1G59910	FORMIN7		Member of family of cytoskeletal-interacting proteins which have the ability to stimulate actin nucleation and barbed-end capping through the combined activity of conserved formin-homology 1 (FH1) and formin-homology 2 (FH2) domains.	0	0	2.23176	3.77369e-50
AT1G55450	AT1G55450			1.84317	4.7012e-45	2.22694	1.62503e-106
AT5G67330	NRAMP4	natural resistance associated macrophage protein 4	Encodes a member of the Nramp2 metal transporter family; like its homolog Atnramp3, localized in vacuolar membrane. Seedlings of double mutant, atnramp3-1 atnramp4-1, were arrested at early germination. The mRNA is cell-to-cell mobile.	1.85262	7.2248e-59	2.22345	2.67634e-89
AT3G49530	NAC062	NAC domain containing protein 62	Transcription factor that serves as a molecular link between cold signals and pathogen resistance responses. Undergoes proteolytic processing triggered by cold-induced changes in membrane fluidity.It relocates from the plasma membrane to the nucleus in response to ER stress. NAC062 is phosphorylated by SnRK2.8 at Thr-142.	0	0	2.2155	1.61241e-78
AT3G57880	FTIP3, MCTP3		Required for maintenance of inflorescence and shoot SAMs and normal development of the derived vascular cambium, functions in the SAM to promote continuous organogenesis, affects SAM development through STM, where it affects intracellular localization of STM in SAM cells in the peripheral region and prevents STM localization toward the cell wall of SAM cells in the peripheral region.	0	0	2.21449	1.31429e-56
AT1G17290	AlaAT1	alanine aminotransferas	Encodes for alanine aminotransferase (ALAAT1), involved in alanine catabolism during plants recovery from hypoxia The mRNA is cell-to-cell mobile.	0.528491	5.25016e-07	2.213	2.85663e-72
AT3G22600	LTPG5		Glycosylphosphatidylinositol (GPI)-anchored LTPg protein, downregulated in syncytia induced by the beet cyst nematode Heterodera schachtii and root knot nematode Meloidogyne incognita. Infection with bacteria (Pseudomonas syringae) and fungi (Botrytis cinerea) leads to the induction of the gene in leaves.	0	0	2.21026	8.16828e-51
AT4G39940	AKN2	APS-kinase 2	adenosine-5'-phosphosulfate-kinase (akn2) mRNA, complete The mRNA is cell-to-cell mobile.	1.64881	4.05861e-38	2.20744	5.60847e-69
AT5G17760	AT5G17760			0	0	2.20636	1.7185e-27
AT1G20510	OPCL1	OPC-8:0 CoA ligase1		2.1632	7.71883e-73	2.19889	1.00296e-52
AT4G20860	AtBBE22, BBE22, CELLOX		involved in the generation of H2O2 from reduced compounds	0	0	2.19301	3.74042e-75
AT5G54710	AT5G54710			0	0	2.19023	8.28936e-103
AT5G48380	BIR1	BAK1-interacting receptor-like kinase 1	Encodes a BAK1-interacting receptor-like kinase named BIR1. Negatively regulates multiple plant resistance signaling pathways, one of which is the SOBIR1(AT2G31880)-dependent pathway.	0.659766	7.67177e-07	2.17904	5.77079e-98
AT4G35630	PSAT	phosphoserine aminotransferase	Encodes a phosphoserine aminotransferase which is involved in serine biosynthesis in the chloroplast which operates via the phosphorylated pathway. The mRNA is cell-to-cell mobile.	1.21095	7.48511e-30	2.17381	4.81357e-59
AT1G78850	GAL1, MBL1		curculin-like (mannose-binding) lectin family protein, low similarity to ser/thr protein kinase from Zea mays (GI:2598067); contains Pfam lectin (probable mannose binding) domain PF01453 but not the protein kinase domain of the Z. mays protein. Belongs to GNA domain lectin family. Enhances PAP26 function to facilitate Pi-scavenging by Pi-starved plants.	0.501694	0.00134117	2.17258	3.52807e-66
AT3G57450	AT3G57450			0	0	2.17085	1.59696e-21
AT1G22280	PAPP2C	phytochrome-associated protein phosphatase type 2C	Encodes a phytochrome-associated protein, PAPP2C (phytochrome-associated protein phosphatase type 2C). PAPP2C interacts in the nucleus with phyA (phytochrome A) and phyB. Functions as a regulator of phytochrome-interacting factor PIF3 by dephosphorylating phytochromes in the nucleus.	0.616033	8.83111e-07	2.16908	2.24991e-100
AT1G69840	AtHIR1			0	0	2.16839	6.91205e-74
AT3G56360	AT3G56360			1.6913	6.48762e-57	2.16794	9.44159e-71
AT2G47730	GSTF8	glutathione S-transferase phi 8	Encodes glutathione transferase belonging to the phi class of GSTs. Naming convention according to Wagner et al. (2002).	0.476758	6.65799e-06	2.16068	2.79931e-73
AT3G04210	TN13		TN13 is a TIR-NBS protein involved in immune response. It co localizes with the ER and perinuclear membranes and interacts with MOS6.	0	0	2.1558	6.75792e-45
AT3G12740	ALIS1	ALA-interacting subunit 1	Physically interacts with ALA3, and is required for the phospholipid translocase activity of ALA3. The mRNA is cell-to-cell mobile.	1.0505	3.66023e-25	2.15384	2.43654e-99
AT1G19530	AT1G19530			0	0	2.13226	1.23282e-29
AT4G04610	APR1	APS reductase 1	Encodes a protein disulfide isomerase-like (PDIL) protein, a member of a multigene family within the thioredoxin (TRX) superfamily. This protein also belongs to the adenosine 5'-phosphosulfate reductase-like (APRL) group. The mRNA is cell-to-cell mobile.	1.09875	1.05943e-18	2.12992	5.89147e-54
AT1G73080	PEPR1	PEP1 receptor 1	Encodes a leucine-rich repeat receptor kinase. Functions as a receptor for AtPep1 to amplify innate immunity response to pathogen attacks. The mRNA is cell-to-cell mobile.	1.4457	1.92134e-30	2.11486	1.41193e-83
AT1G66580	SAG24	senescence associated gene 24		0.397613	0.00106043	2.11176	1.34522e-74
AT4G37640	ACA2	calcium ATPase 2	Encodes a calmodulin-regulated Ca(2+)-pump located in the endoplasmic reticulum. Belongs to plant 2B ATPase's with an N-terminal autoinhibitor.	1.12485	3.74159e-14	2.10292	9.46465e-88
AT1G70530	CRK3	cysteine-rich RLK (RECEPTOR-like protein kinase) 3	Encodes a cysteine-rich receptor-like protein kinase.	0	0	2.09221	1.14636e-48
AT1G55920	SERAT2;1	serine acetyltransferase 2;1	Encodes a chloroplast/cytosol localized serine O-acetyltransferase involved in sulfur assimilation and cysteine biosynthesis. Expressed in the vascular system. The mRNA is cell-to-cell mobile.	1.02827	1.66093e-22	2.07769	1.55211e-97
AT5G41080	GDPD2	glycerophosphodiester phosphodiesterase 2	Encodes a member of the glycerophosphodiester phosphodiesterase (GDPD) family.	-0.89185	1.26394e-14	2.07402	6.19805e-70
AT2G38290	AMT2	ammonium transporter 2	encodes a high-affinity ammonium transporter, which is expressed in shoot and root. Expression in root and shoot is under nitrogen and carbon dioxide regulation, respectively.	0.335559	0.00695153	2.06827	1.18023e-49
AT3G08760	ATSIK		Encodes an osmotic stress-inducible kinase that functions as a negative regulator of osmotic stress signaling in plants.	0	0	2.0677	4.28302e-59
AT1G51800	IOS1	IMPAIRED OOMYCETE SUSCEPTIBILITY 1	The gene encodes a putative member of the LRR-RLK protein family. Expressin and mutant analysis revealed that it contributes to the interaction between Arabidopsis and Hyaloperonospora arabidopsidis. and The mRNA is cell-to-cell mobile.	0	0	2.06445	2.59335e-65
AT4G17230	SCL13	SCARECROW-like 13	Encodes a scarecrow-like protein (SCL13). Member of GRAS gene family. Regulated by heat shock.	1.5386	1.83656e-35	2.06234	1.29332e-104
AT3G19010	2-OXOGLUTARATE OXYGENASE			0.924837	5.43974e-14	2.05848	3.16963e-66
AT2G46500	PI4K GAMMA 4	phosphoinositide 4-kinase gamma 4	Phosphoinositide kinase which undergo autophosphorylation and phosphorylate serine/threonine residues of protein substrates. Contains phosphoinositide 3/4-kinase and ubiquitin-like domains. Phosphorylates PUFD1 and RPN10 in vitro.	0.389195	0.0014534	2.05758	1.28324e-94
AT2G20960	pEARLI4			0	0	2.05722	3.36704e-77
AT2G43620	AT2G43620			0	0	2.04877	7.84425e-18
AT1G61360	AT1G61360			0.880428	7.82361e-10	2.04463	6.04368e-84
AT1G18890	CDPK1	calcium-dependent protein kinase 1	encodes a calcium-dependent protein kinase whose gene expression is induced by dehydration and high salt. Kinase activity could not be detected in vitro.	0	0	2.03467	2.91548e-80
AT1G22890	STMP2		Secreted peptide which functions in plant growth and pathogen defense.	0	0	2.03413	9.60584e-44
AT1G32920	AT1G32920			0	0	2.03405	1.57511e-31
AT1G28600	AT1G28600		GDSL-motif esterase/acyltransferase/lipase. Enzyme group with broad substrate specificity that may catalyze acyltransfer or hydrolase reactions with lipid and non-lipid substrates.	0	0	2.03314	5.12863e-79
AT1G03370	AT1G03370			0	0	2.03189	9.56611e-75
AT4G01700	AT4G01700			0.338017	0.03128	2.02934	4.64041e-49
AT4G23570	SGT1A		Closely related to SGT1B, may function in SCF(TIR1) mediated protein degradation. AtSGT1a and AtSGT1b are functionally redundant in the resistance to pathogenes. AtSGT1b was more highly expressed than AtSGT1. The N-terminal TPR domain of AtSGT1a reduces the steady-state level of Arabidopsis SGT1 proteins whereas the same domain from AtSGT1b enhances SGT1 accumulation. The TPR domain is dispensabl…	0	0	2.02857	1.41799e-73
AT4G25700	BETA-OHASE 1	beta-hydroxylase 1	Converts beta-carotene to zeaxanthin via cryptoxanthin.	0	0	2.02639	4.26815e-88
AT1G56660	AT1G56660			0	0	2.02397	1.02471e-45
AT1G18740	B1L		DUF793 domain containing protein. Expression is induced by cold. Loss of function mutations are more sensitive to freezing and have reduced levels of CBFs. May act by preventing degradation of CBFs.	0	0	2.02242	6.94391e-23
AT1G64980	CDI	cadmium 2 induced	Encodes a putative nucleotide-diphospho-sugar transferase required for pollen germination and tube growth.	0	0	2.01393	3.80584e-47
AT4G30530	GGP1	gamma-glutamyl peptidase 1	Encodes a gamma-glutamyl peptidase, outside the GGT family, that can hydrolyze gamma-glutamyl peptide bonds. The mRNA is cell-to-cell mobile.	0.937161	2.07942e-14	2.00985	3.76092e-41
AT2G33120	SAR1	synaptobrevin-related protein 1	Encodes a member of Synaptobrevin-like protein family. Also known as VESICLE-ASSOCIATED MEMBRANE PROTEIN 722 (VAMP722). Required for cell plate formation. Post-transcriptionally regulated by CRT1/2 under ER stress.	0	0	2.00643	5.63039e-82
AT1G78380	GSTU19	glutathione S-transferase TAU 19	Encodes a glutathione transferase that is a member of Tau GST gene family. Expression is induced by drought stress, oxidative stress, and high doses of auxin and cytokinin. naming convention according to Wagner et al. (2002) The expression of this gene is upregulated by herbicide safeners such as benoxacor and fenclorim.	0.54418	4.35874e-07	2.00543	1.68398e-61
AT5G20830	SUS1	sucrose synthase 1	Encodes a protein with sucrose synthase activity (SUS1).	0	0	2.0047	1.29255e-28
AT3G48090	EDS1	enhanced disease susceptibility 1	Component of R gene-mediated disease resistance in Arabidopsis thaliana with homology to eukaryotic lipases.	0	0	1.99723	7.09382e-55
AT3G52870	AT3G52870			1.02086	3.4392e-26	1.99567	5.27625e-48
AT4G34200	EDA9	embryo sac development arrest 9	Encodes a 3-phosphoglycerate dehydrogenase that is essential for embryo and pollen development.	0.779635	2.54622e-10	1.99535	2.78119e-52
AT5G57035	AT5G57035			0	0	1.99385	2.8693e-43
AT2G44790	UCC2	uclacyanin 2	Encodes a uclacyanin, a protein precursor that is closely related to precursors of stellacyanins and a blue copper protein from pea pods.	0	0	1.98769	1.12167e-49
AT5G49450	bZIP1	basic leucine-zipper 1	Encodes a transcription activator is a positive regulator of plant tolerance to salt, osmotic and drought stresses.	0	0	1.98394	1.42668e-55
AT3G06500	A/N-InvC	alkaline/neutral invertase C	Encodes an alkaline/neutral invertase which localizes in mitochondria. It may be modulating hormone balance in relation to the radicle emergence. Mutants display severely reduced shoot growth and reduced oxygen consumption. Mutant root development is not affected as reported for A/N-InvA mutant (inva) plants. The mRNA is cell-to-cell mobile.	0.950657	4.82567e-11	1.98168	4.80344e-81
AT3G13310	DJC66			0	0	1.97556	8.47016e-64
AT1G28380	NSL1	necrotic spotted lesions 1	This gene is predicted to encode a protein involved in negatively regulating salicylic acid-related defense responses and cell death programs. nsl1 mutants develop necrotic lesions spontaneously and show other features of a defense response, such as higher levels of SA and disease resistance-related transcripts, in the absence of a biotic stimulus. The NSL1 protein is predicted to have a MACPF do…	1.04527	1.5382e-16	1.97514	2.78035e-87
AT3G51920	CAM9	calmodulin 9	encodes a divergent member of calmodulin, which is an EF-hand family of Ca2+-binding proteins. This gene is expressed in leaves, flowers and siliques. The gene functionally complements yeast calmodulin 1 (CAM1) but only when selected against the plasmid harboring wild-type yeast sequences. Also the protein does not form formed a complex with a basic amphiphilic helical peptide in the presence of …	0	0	1.9749	7.98922e-67
AT3G10300	AT3G10300			0	0	1.97441	1.22312e-45
AT5G17990	TRP1	tryptophan biosynthesis 1	Encodes the tryptophan biosynthetic enzyme phosphoribosylanthranilate transferase (PAT1, called trpD in bacteria). Converts anthranilate and phosphoribosylpyrophosphate into phosphoribosylanthranilate and inorganic pyrophosphate. The mRNA is cell-to-cell mobile.	0.816721	2.92929e-11	1.97039	2.43763e-59
AT5G64310	AGP1	arabinogalactan protein 1	Encodes arabinogalactan-protein (AGP1). The mRNA is cell-to-cell mobile.	0	0	1.96254	1.8359e-54
AT5G47730	AT5G47730			0	0	1.9617	2.64008e-44
AT3G09940	MDHAR	monodehydroascorbate reductase	Encodes a member of the monodehydroascorbate reductase gene family. Critical for a mutualistic symbiosis between the host Arabidopsis and the root colonizing fungus Piriformospora indica.	0.979329	8.74777e-11	1.96041	1.22483e-19
AT3G56880	AT3G56880			0	0	1.9528	2.28264e-22
AT4G34710	ADC2	arginine decarboxylase 2	Encodes a arginine decarboxylase (ADC), a rate-limiting enzyme that catalyzes the first step of polyamine (PA) biosynthesis via ADC pathway in Arabidopsis thaliana. Arabidopsis genome has two ADC paralogs, ADC1 and ADC2. ADC2 is stress-inducible (osmotic stress). Double mutant analysis showed that ADC genes are essential for the production of PA, and are required for normal seed development. Over…	0.785741	2.35422e-11	1.94893	1.01001e-53
AT2G26190	IQM4		IQM4 is a plastid localized, Ca2+ independent calmodulin binding protein that is involved in promoting seed dormancy.	0	0	1.9417	9.74276e-54
AT3G48890	MAPR3	membrane-associated progesterone binding protein 3	putative progesterone-binding protein homolog (Atmp2) mRNA, The mRNA is cell-to-cell mobile.	0.831548	5.77905e-11	1.93397	3.00488e-85
AT4G17900	PLATZ11			1.15382	1.90529e-22	1.93294	8.32476e-70
AT1G54100	ALDH7B4	aldehyde dehydrogenase 7B4	Aldehyde dehydrogenase	0.257226	0.0390283	1.92721	2.75983e-61
AT1G31130	AT1G31130			0	0	1.92123	6.47131e-60
AT1G08450	CRT3	calreticulin 3	Encodes one of three Arabidopsis calreticulins. In CRT-deficient mouse fibroblasts, this protein restores ER Ca2+ levels. Non-receptor component required for EFR-mediated immunity. Mutants show de-repressed anthocyanin accumulation in the presence of elf18, and EFR accumulation and signalling.	0	0	1.91757	3.8722e-55
AT1G17745	PGDH	3-phosphoglycerate dehydrogenase	encodes a 3-Phosphoglycerate dehydrogenase The mRNA is cell-to-cell mobile.	1.33796	6.30037e-21	1.91452	2.41827e-53
AT1G21110	IGMT3	indole glucosinolate O-methyltransferase 3		0	0	1.89309	6.70914e-27
AT1G13990	AT1G13990			0	0	1.88727	3.12485e-65
AT3G45640	MPK3	mitogen-activated protein kinase 3	Encodes a mitogen-activated kinase whose mRNA levels increase in response to touch, cold, salinity stress and chitin oligomers.Also functions in ovule development. Heterozygous MPK3 mutants in a homozygous MPK6 background are female sterile due to defects in integument development. MPK3 can be dephosphorylated by MKP2 in vitro. The mRNA is cell-to-cell mobile.	1.79424	7.39629e-61	1.8826	1.52283e-71
AT2G43820	UGT74F2	UDP-glucosyltransferase 74F2	Encodes a nicotinate-O-glycosyltransferase. Induced by Salicylic acid, virus, fungus and bacteria. Also involved in the tryptophan synthesis pathway. Independent of NPR1 for their induction by salicylic acid. UGT74F1 transfers UDP:glucose to salicylic acid (forming a glucoside (SAG) and a glucose ester (SGE)), benzoic acid, and anthranilate in vitro. UGT74F2 shows a weak ability to catalyze the f…	0.775244	3.69197e-14	1.88007	1.79637e-44
AT2G24550	AT2G24550			0	0	1.87991	3.77735e-69
AT1G56140	AT1G56140			0	0	1.87896	1.53666e-49
AT1G45145	TRX5	thioredoxin H-type 5	encodes a cytosolic thioredoxin that reduces disulfide bridges of target proteins by the reversible formation of a disulfide bridge between two neighboring Cys residues present in the active site. Thioredoxins have been found to regulate a variety of biological reactions in prokaryotic and eukaryotic cells.	0	0	1.86945	2.34474e-37
AT3G26210	CYP71B23	cytochrome P450, family 71, subfamily B, polypeptide 23	putative cytochrome P450 The mRNA is cell-to-cell mobile.	0	0	1.86715	1.58535e-46
AT3G17770	AT3G17770			1.3252	7.30858e-30	1.86164	5.46611e-47
AT5G58430	EXO70B1	exocyst subunit exo70 family protein B1	A member of EXO70 gene family, putative exocyst subunits, conserved in land plants. Arabidopsis thaliana contains 23 putative EXO70 genes, which can be classified into eight clusters on the phylogenetic tree. Targeted by AvrPtoB to manipulate the defense molecule secretion machinery.	0.900143	1.64668e-14	1.85392	7.54154e-75
AT4G33540	AT4G33540			0	0	1.85392	1.78006e-68
AT5G24210	AT5G24210			0	0	1.85322	1.3403e-59
AT3G17410	CARK1		Positively regulates ABA-mediated physiological responses via phosphorylation on RCAR3/ RCAR11.	0	0	1.85035	3.3617e-71
AT2G37940	AtIPCS2	Arabidopsis Inositol phosphorylceramide synthase 2		0	0	1.84328	7.96649e-61
AT1G76680	OPR1	12-oxophytodienoate reductase 1	Encodes a member of an alpha/beta barrel fold family of FMN-containing oxidoreductases. One of the closely related 12-oxophytodienoic acid reductases. This enzyme is not expected to participate in jasmonic acid biosynthesis because during in vitro assays, it shows very little activity with the naturally occurring OPDA isomer. Shows activity towards 2,4,6-trinitrotoluene. Expressed predominately i…	0.687759	1.01085e-07	1.83724	2.02023e-55
AT3G22890	APS1	ATP sulfurylase 1	encodes ATP sulfurylase, the first enzyme in the sulfate assimilation pathway of Arabidopsis. It may also participate in selenium metabolism. The mRNA is cell-to-cell mobile.	1.01317	9.89092e-20	1.8326	1.46212e-41
AT3G59350	AT3G59350			0	0	1.83029	2.87577e-65
AT4G30210	ATR2	P450 reductase 2	Encodes NADPH-cytochrome P450 reductase that catalyzes the first oxidative step of the phenylpropanoid general pathway. The mRNA is cell-to-cell mobile.	1.11203	2.04185e-26	1.82629	2.28219e-57
AT5G19440	AT5G19440		similar to Eucalyptus gunnii alcohol dehydrogenase of unknown physiological function (GI:1143445), apple tree, PIR:T16995; NOT a cinnamyl-alcohol dehydrogenase	0.534067	6.85478e-07	1.82294	2.08273e-45
AT5G59550	RDUF2	RING and Domain of Unknown Function 1117 2	Encodes an ABA- and drought-induced RING-DUF1117 gene whose mutation results in hyposensitive phenotypes toward ABA in terms of germination rate and stomatal closure and markedly reduced tolerance to drought stress relative to wild-type plants.	0	0	1.82006	2.08201e-20
AT5G13490	AAC2	ADP/ATP carrier 2	Encodes mitochondrial ADP/ATP carrier	0	0	1.81576	7.98722e-34
AT3G50950	ZAR1	HOPZ-ACTIVATED RESISTANCE 1	Encodes a canonical CC-type NLR protein that is required for the recognition of the T3SE HopZ1a as well as several other Hop effectors from the pathogenic bacteria P. syringae.	0.795656	6.05036e-13	1.80795	2.11786e-70
AT1G33110	AT1G33110			1.48166	6.02203e-27	1.80504	1.78001e-68
AT1G73500	MKK9	MAP kinase kinase 9	member of MAP Kinase Kinase family. Autophosphorylates and also phosphorylates MPK3 and MPK6. Independently involved in ethylene and calmalexin biosynthesis. Induces transcription of ACS2, ACS6, ERF1, ERF2, ERF5, ERF6, CYP79B2, CYP79B3, CYP71A13 and PAD3.	1.43003	4.41936e-33	1.79789	1.19179e-41
AT2G02220	PSKR1	phytosulfokin receptor 1	Encodes a protein interacting with phytosulfokine, a five amino acid sulfated peptide (YIYTQ). Contains dual guanylate cyclase and kinase catalytic activities that operate in vivo.	0	0	1.79667	1.16075e-47
AT1G55020	LOX1	lipoxygenase 1	lipoxygenase, a defense gene conferring resistance Xanthomonas campestris The mRNA is cell-to-cell mobile.	0	0	1.79265	4.0545e-29
AT1G18590	SOT17	sulfotransferase 17	encodes a desulfoglucosinolate sulfotransferase, involved in the final step of glucosinolate core structure biosynthesis. Has a broad-substrate specificity with preference with methionine-derived desulfoglucosinolates.	0	0	1.78413	2.11389e-40
AT2G36580	AT2G36580			0	0	1.78251	1.02314e-55
AT3G62150	ABCB21	ATP-binding cassette B21	Encodes a facultative transporter controlling auxin concentrations in plant cells.	0	0	1.78037	1.65599e-67
AT1G52200	AT1G52200			-0.440652	0.00179576	1.7787	8.82254e-56
AT2G36800	DOGT1	don-glucosyltransferase 1	Encodes a DON-Glucosyltransferase. The UGT73C5 glucosylates both brassinolide and castasterone in the 23-O position. The enzyme is presumably involved in the homeostasis of those steroid hormones hence regulating BR activity. Transgenic plants overexpressing UGT73C5 show a typical BR-deficient phenotype.	0	0	1.77633	4.94733e-45
AT3G19240	AT3G19240			0	0	1.76897	1.79305e-33
AT5G22060	J2	DNAJ homologue 2	Co-chaperonin similar to E. coli DnaJ	0.596535	6.79898e-10	1.76801	1.73741e-71
AT1G11310	MLO2	MILDEW RESISTANCE LOCUS O 2	A member of a large family of seven-transmembrane domain proteins specific to plants, homologs of the barley mildew resistance locus o (MLO) protein. The Arabidopsis genome contains 15 genes encoding MLO proteins, with localization in plasma membrane. Phylogenetic analysis revealed four clades of closely-related AtMLO genes. ATMLO2 belongs to the clade IV, with AtMLO3, AtMLO6 and AtMLO12. The gen…	0.827338	1.16606e-16	1.76538	6.93139e-60
AT3G44190	AT3G44190			0.855189	4.58367e-14	1.76367	3.06317e-45
AT5G61010	EXO70E2	exocyst subunit exo70 family protein E2	A member of EXO70 gene family, putative exocyst subunits, conserved in land plants. Arabidopsis thaliana contains 23 putative EXO70 genes, which can be classified into eight clusters on the phylogenetic tree.	0	0	1.75811	4.06106e-40
AT4G15530	PPDK	pyruvate orthophosphate dikinase	The product of this long transcript was shown to be targeted to the chloroplast, whereas the shorter transcript (no targeting sequence) accumulates in the cytosol. They were also found in slightly different tissues.	0	0	1.75794	1.21803e-35
AT4G15610	CASPL1D1			-1.53489	5.67499e-41	1.75185	1.43165e-54
AT5G66210	CPK28	calcium-dependent protein kinase 28	Calcium Dependent Protein Kinase. Functions in the BIK1 innate immune response pathway.	1.34335	5.47894e-30	1.74993	3.76585e-46
AT5G19550	ASP2	aspartate aminotransferase 2	Nitrogen metabolism. Major cytosolic isoenzyme controlling aspartate biosynthesis in the light. The mRNA is cell-to-cell mobile.	0	0	1.7471	2.24788e-50
AT3G01420	DOX1		Encodes an alpha-dioxygenase involved in protection against oxidative stress and cell death. Induced in response to Salicylic acid and oxidative stress. Independent of NPR1 in induction by salicylic acid. The mRNA is cell-to-cell mobile.	-0.355814	0.0248724	1.74706	2.62454e-29
AT1G80300	NTT1	nucleotide transporter 1	Encodes an ATP/ADP transporter. The mRNA is cell-to-cell mobile.	1.28036	1.09761e-28	1.74068	1.32802e-57
AT2G06050	OPR3	oxophytodienoate-reductase 3	Encodes a 12-oxophytodienoate reductase that is required for jasmonate biosynthesis. Mutants are male sterile and defective in pollen dehiscence. Shows activity towards 2,4,6-trinitrotoluene. CFA-Ile, CFA-Leu, CFA-Val, CFA-Met and CFA-Ala can restore the fertility of opr3 plants by inducing filament elongation and anther dehiscence.	1.26326	1.21098e-28	1.73795	9.40225e-33
AT3G01290	HIR2	hypersensitive induced reaction 2		0	0	1.72554	1.34482e-47
AT1G27770	ACA1	autoinhibited Ca2 -ATPase 1	Encodes a chloroplast envelope Ca2+-ATPase with an N-terminal autoinhibitor.	1.33809	2.19912e-24	1.72044	6.25589e-51
AT3G05200	ATL6	Arabidopsis toxicos en levadura 6	Encodes a putative RING-H2 zinc finger protein ATL6 (ATL6). The mRNA is cell-to-cell mobile.	0	0	1.72022	2.09984e-75
AT4G36988				0.474948	0.000714992	1.71411	6.94569e-46
AT1G02850	BGLU11	beta glucosidase 11		0	0	1.71353	2.03744e-26
AT2G42750	DJC77			1.59235	1.21987e-56	1.71281	1.11279e-44
AT4G38540	AT4G38540			1.04034	8.73775e-18	1.69987	1.17773e-54
AT5G27380	GSH2	glutathione synthetase 2	Encodes a protein with similarity to glutathione synthetases, which catalyzes one of the early steps in glutathione biosynthesis. Two transcripts have been detected; the longer transcript is less abundant and the protein is localized to the chloroplast. The smaller transcript, in which the transit peptide is truncated, is localized to the cytosol. Increased glutathione accumulation in response to…	0.805376	7.99931e-11	1.69887	5.62973e-47
AT4G23600	CORI3	CORONATINE INDUCED 1	Encodes cystine lyase which is expected to be involved in amino acid metabolism, providing the plant with cysteine and the generation of precursors of ethylene biosynthesis. mRNA levels are elevated in response to wounding.	1.33986	6.96079e-30	1.69732	1.42698e-09
AT1G25550	HHO3, NIGT1.1		Member of HHO/HRS GARP type transcriptional repressor family. Involved in Pi uptake and Pi starvation signaling. Transcriptional repressors that functions with other NIGT genes as an important hub in the nutrient signaling network associated with the acquisition and use of nitrogen and phosphorus.	0.29682	0.0141947	1.69314	2.62112e-67
AT4G02940	ALKBH10B		ALKBH10B is a functional RNA N6-methyladenosine demethylase. Reduction in ALKBH10B decreases m6A levels, and affects the stability of flowering time genes including FT, SPL3 and SPL9. Mutant plants are early flowering.	0	0	1.68834	1.08827e-39
AT3G21630	CERK1	chitin elicitor receptor kinase 1	LysM receptor-like kinase, based on protein sequence alignment analysis, it has a typical RD signaling domain in its catalytic loop and possesses autophosphorylation activity. Involved in the perception and transduction of the chitin oligosaccharide elicitor. Located in the plasma membrane. CERK1 phosphorylates LIK1, a LLR-RLK that is involved in innate immunity,	0	0	1.67275	5.49754e-34
AT1G61250	SC3	secretory carrier 3	Encodes a putative secretory carrier membrane protein (SC3). The mRNA is cell-to-cell mobile.	0	0	1.67044	5.796e-64
AT1G27100	AT1G27100			0	0	1.66949	3.13831e-52
AT4G19880	AT4G19880			0.272311	0.0391763	1.66164	1.84327e-64
AT1G08920	ESL1	ERD (early response to dehydration) six-like 1	Encodes ESL1, a transporter for monosaccharides.	2.36062	5.24343e-51	1.6603	9.39624e-20
AT1G03740	AT1G03740			0.566204	8.5109e-07	1.65372	1.77167e-66
AT3G07390	AIR12	Auxin-Induced in Root cultures 12	isolated from differential screening of a cDNA library from auxin-treated root culture. sequence does not show homology to any known proteins and is predicted to be extracellular. The mRNA is cell-to-cell mobile.	-0.516544	0.000171198	1.65152	8.93702e-58
AT2G27500	AT2G27500			0	0	1.64978	2.28156e-36
AT5G42020	BIP2		Luminal binding protein (BiP2) involved in polar nuclei fusion during proliferation of endosperm nuclei.	0	0	1.63996	6.54429e-36
AT5G20000	AT5G20000			0	0	1.63861	8.2252e-37
AT2G37110	AT2G37110			0	0	1.63319	1.87627e-48
AT5G43580	UPI	UNUSUAL SERINE PROTEASE INHIBITOR	Predicted to encode a PR (pathogenesis-related) peptide that belongs to the PR-6 proteinase inhibitor family. Functions in resistance to necrotrophic fungi and insect herbivory. Six putative PR-6-type protein encoding genes are found in Arabidopsis: At2g38900, At2g38870, At5g43570, At5g43580, At3g50020 and At3g46860.	0	0	1.63244	3.20123e-25
AT5G02290	NAK		Encodes a candidate protein kinase NAK that is similar to the oncogenes met and abl.	0	0	1.62954	1.614e-41
AT4G31860	AT4G31860			0	0	1.6283	9.56768e-32
AT3G27060	TSO2	TSO MEANING 'UGLY' IN CHINESE 2	Encodes one of the 3 ribonucleotide reductase (RNR) small subunit genes. TSO2 transcription occurs predominantly at the S-phase of the cell cycle and its expression pattern is consistent with its role in dNDP biosynthesis during DNA replication in actively dividing cells. Critical for cell cycle progression, DNA damage repair and plant development.	1.58819	4.65248e-42	1.62248	7.50658e-40
AT5G43450	AT5G43450		encodes a protein whose sequence is similar to ACC oxidase	0	0	1.62153	8.21369e-31
AT1G12200	FMO	flavin monooxygenase	Putative flavin monooxygenase.	0	0	1.61733	1.33166e-32
AT1G53430	NILR2		Probable LRR receptor-like ser/thr-protein kinase; Commonly-enriched candidate LPS-interacting PM-associated proteins for both LPS chemotypes subsequent to the polymyxin B affinity chromatography strategy.	0.687617	4.02237e-09	1.61441	3.39613e-60
AT2G03240	AT2G03240			0	0	1.61138	2.73655e-38
AT2G39210	PIC30		Major facilitator superfamily transmembrane transporter responsible for the uptake of picolinate herbicides.	-0.613302	6.27621e-08	1.6085	2.99784e-31
AT5G11520	ASP3	aspartate aminotransferase 3	Encodes the chloroplastic isozyme of aspartate aminotransferase. Involved in aspartate biosynthesis and nitrogen metabolism. mRNA is expressed in senescing leaves.	0	0	1.60688	2.56604e-59
AT5G54500	FQR1	flavodoxin-like quinone reductase 1	Encodes a flavin mononucleotide-binding flavodoxin-like quinone reductase that is a primary auxin-response gene.	0	0	1.60491	1.98019e-39
AT5G47120	BI1	BAX inhibitor 1	Encodes BI-1, a homolog of mammalian Bax inhibitor 1. Functions as an attenuator of biotic and abiotic types of cell death. Bax-induced cell death can be downregulated by ectopically expressing AtBI in planta. The mRNA is cell-to-cell mobile.	0	0	1.60011	2.01555e-54
AT3G18830	PMT5	polyol/monosaccharide transporter 5	This gene encodes a plasma membrane-localized polyol/cyclitol/monosaccharide-H+-symporter. The symporter is able to catalyze the energy-dependent membrane passage of a wide range of linear polyols (three to six carbon backbone), of cyclic polyols (<i>myo</i>-inositol), and of numerous monosaccharides, including pyranose ring-forming and furanose ring-forming hexoses and pentoses. This gene belong…	0.733244	5.12179e-13	1.59655	6.08173e-50
AT5G61820	AT5G61820			0.687264	1.38996e-10	1.59517	1.80313e-41
AT1G59870	PEN3	PENETRATION 3	ATP binding cassette transporter. Localized to the plasma membrane in uninfected cells. In infected leaves, the protein concentrated at infection sites. Contributes to nonhost resistance to inappropriate pathogens that enter by direct penetration in a salicylic acid–dependent manner. Required for mlo resistance. Has Cd transporter activity (Cd2+ extrusion pump) and contributes to heavy metal resi…	1.03026	9.80931e-13	1.59333	9.08318e-40
AT1G09940	HEMA2		Encodes glutamyl-tRNA reductase. Involved in heme biosynthesis in non-photosynthetic tissues and induced by oxidative stress in photosynthetic tissues to supply heme for defensive hemoproteins	0	0	1.59208	1.51385e-34
AT5G59730	EXO70H7	exocyst subunit exo70 family protein H7	A member of EXO70 gene family, putative exocyst subunits, conserved in land plants. Arabidopsis thaliana contains 23 putative EXO70 genes, which can be classified into eight clusters on the phylogenetic tree. The mRNA is cell-to-cell mobile.	0.658075	1.80004e-06	1.59131	1.82113e-33
AT4G14680	APS3		Encodes one of three A. thaliana ATP-sulfurylases. APS is the first enzyme of sulfate assimilation that catalyzes the formation of adenosine-5'-phosphosulfate from ATP and sulfate.	0	0	1.57515	1.53166e-19
AT3G52450	PUB22	plant U-box 22	Encodes a cytoplasmically localized U-box domain E3 ubiquitin ligase protein that is involved in the response to water stress and acts as a negative regulator of PAMP-triggered immunity.	0.297563	0.0459543	1.57338	2.01243e-26
AT4G31550	WRKY11	WRKY DNA-binding protein 11	member of WRKY Transcription Factor; Group II-d; negative regulator of basal resistance to Pseudomonas syringae.	0	0	1.57269	4.18796e-44
AT2G44490	PEN2	PENETRATION 2	Encodes a glycosyl hydrolase that localizes to peroxisomes and acts as a component of an inducible preinvasion resistance mechanism. Required for mlo resistance. The mRNA is cell-to-cell mobile.	0.600476	2.8265e-06	1.57107	6.64156e-44
AT2G42890	ML2	MEI2-like 2	A member of mei2-like gene family, predominantly plant-based family of genes encoding RNA binding proteins with characteristic presence of a highly conserved RNA binding motif first described in the mei2 gene of the fission yeast S. pombe. In silico analyses reveal nine mei2 -like genes in A. thaliana. They were grouped into four distinct clades, based on overall sequence similarity and subfamily…	0	0	1.56102	4.2617e-33
AT1G64280	NPR1	NONEXPRESSER OF PR GENES 1	This gene is a key regulator of the salicylic acid (SA)-mediated systemic acquired resistance (SAR) pathway. It is similar to the transcription factor inhibitor I kappa B, and contains ankyrin repeats. It confers resistance to the pathogens Pseudomonas syringae and Peronospora parasitica in a dosage-dependent fashion. Although transgenic Arabidopsis plants overexpressing NPR1 acquire enhanced sen…	0	0	1.55746	4.27046e-34
AT1G02660	PLIP2		PLIP2 is a glycerolipid A1 lipase with substrate preference for monogalactosyldiacylglycerol. Expression is induced by ABA.	0	0	1.55447	3.58107e-38
AT4G15760	MO1	monooxygenase 1	Encodes a protein with similarity to monooxygenases that are known to degrade salicylic acid (SA).	0	0	1.5397	1.46178e-52
AT1G13360	AT1G13360			0.586351	9.64439e-06	1.53934	1.09916e-46
AT5G19230	AT5G19230			0	0	1.5387	4.7661e-54
AT4G13180	AT4G13180			0	0	1.5271	1.20945e-26
AT4G08770	Prx37	peroxidase 37	Encodes a putative apoplastic peroxidase Prx37. Primarily expressed in the vascular bundles. Overexpression renders a dwarf phenotype with smaller plants and delayed development. Plants overexpressing Prx37 also shows an increase in the amount of esterified phenolic material associated with their walls.	0	0	1.50962	4.09044e-37
AT2G20900	DGK5	diacylglycerol kinase 5		0	0	1.50528	3.41593e-32
AT4G34120	LEJ1	LOSS OF THE TIMING OF ET AND JA BIOSYNTHESIS 1	Encodes a single cystathionine beta-Synthase domain-containing protein. Modulates development by regulating the thioredoxin system. The mRNA is cell-to-cell mobile.	0.534827	7.17657e-07	1.50489	1.12372e-52
AT4G22690	CYP706A1	cytochrome P450, family 706, subfamily A, polypeptide 1	member of CYP706A The mRNA is cell-to-cell mobile.	1.88507	3.36261e-27	1.50179	7.40016e-36
AT5G27600	LACS7	long-chain acyl-CoA synthetase 7	Encode peroxisomal long-chain acyl-CoA synthetase. Activates fatty acids for further metabolism. Interacts with PEX5.	0	0	1.49816	8.04934e-32
AT5G64250	AT5G64250			0.379762	0.00077134	1.49805	5.75958e-48
AT5G66850	MAPKKK5	mitogen-activated protein kinase kinase kinase 5	Encodes a member of the MEKK subfamily that functions redundantly with MAPKKK3 to activate MPK3/6 downstream of multiple pattern recognition receptors and confer resistance to both bacterial and fungal pathogens.	0	0	1.49464	6.66964e-27
AT1G21130	IGMT4	indole glucosinolate O-methyltransferase 4		1.21322	3.44485e-10	1.49092	1.44598e-33
AT3G13610	F6'H1		Encodes a Fe(II)- and 2-oxoglutarate-dependent dioxygenase family gene F6'H1. Mutations in this gene compromise iron uptake and the production of fluorescent phenolics involved in Fe uptake. The mRNA is cell-to-cell mobile.	0	0	1.49054	1.76027e-24
AT3G46620	RDUF1	RING and Domain of Unknown Function 1117 1	Encodes an ABA- and drought-induced RING-DUF1117 gene whose mutation results in hyposensitive phenotypes toward ABA in terms of germination rate and stomatal closure and markedly reduced tolerance to drought stress relative to wild-type plants.	0	0	1.48787	1.06796e-07
AT4G08850	MIK2		MIK1 encodes a receptor kinase that forms a complex with MDIS1/MIK2 and binds LURE1, the female pollen guidance chemi-attractant. MIK1 phosphorylates MDIS1 and is autophosphorylated.	-0.313596	0.0162497	1.48767	9.96034e-34
AT2G39400	MAGL6			0	0	1.485	2.61552e-42
AT2G47000	ABCB4	ATP-binding cassette B4	Encodes an auxin efflux transmembrane transporter that is a member of the multidrug resistance P-glycoprotein (MDR/PGP) subfamily of ABC transporters. Functions in the basipetal redirection of auxin from the root tip. Exhibits apolar plasma membrane localization in the root cap and polar localization in tissues above and is involved in root hair elongation.	0	0	1.48003	3.75605e-49
AT1G53440	AT1G53440			1.19971	6.53887e-30	1.4797	1.73228e-52
AT5G04720	ADR1-L2	ADR1-like 2	Encodes a member of the ADR1 family nucleotide-binding leucine-rich repeat (NB-LRR) immune receptors. The mRNA is cell-to-cell mobile.	0.703893	8.66736e-08	1.47534	6.95303e-45
AT3G55270	MKP1	mitogen-activated protein kinase phosphatase 1	Encodes MAP kinase phosphatase 1 (MKP1). Loss of MKP1 results in hypersensitivity to acute UV-B stress, but without impairing UV-B acclimation.	0	0	1.47378	6.40537e-54
AT1G08930	ERD6	EARLY RESPONSE TO DEHYDRATION 6	encodes a putative sucrose transporter whose gene expression is induced by dehydration and cold. The mRNA is cell-to-cell mobile.	0.645466	4.77205e-05	1.47239	8.61944e-38
AT2G41420	WIH2	WINDHOSE 2		0	0	1.4694	5.63279e-32
AT1G21450	SCL1	SCARECROW-like 1	Encodes a scarecrow-like protein (SCL1). Member of GRAS gene family. The mRNA is cell-to-cell mobile.	0	0	1.46773	4.21208e-31
AT4G30490	AT4G30490			0	0	1.4652	1.35484e-24
AT2G22500	UCP5	uncoupling protein 5	Encodes one of the mitochondrial dicarboxylate carriers (DIC): DIC1 (AT2G22500), DIC2 (AT4G24570), DIC3 (AT5G09470).	1.46459	1.0142e-24	1.45907	2.66706e-12
AT2G37710	RLK	receptor lectin kinase	Induced in response to Salicylic acid. The mRNA is cell-to-cell mobile.	0	0	1.45761	7.45055e-19
AT5G58070	TIL	temperature-induced lipocalin	Encodes a temperature-induced lipocalin TIL1. Involved in thermotolerance. Peripherally associated with plasma membrane.	0	0	1.45132	6.78131e-47
AT4G20110	VSR7	VACUOLAR SORTING RECEPTOR 7		0	0	1.4468	9.03883e-24
AT1G77760	NIA1	nitrate reductase 1	Encodes the cytosolic minor isoform of nitrate reductase (NR). Involved in the first step of nitrate assimilation, it contributes about 15% of the nitrate reductase activity in shoots. Similar to molybdopterin oxidoreductases at the N-terminus, and to FAD/NAD-binding cytochrome reductases at the C-terminus. Cofactors: FAD, heme iron (cytochrome B-557), and molybdenum-pterin.	0.338158	0.00574742	1.44383	1.89093e-34
AT2G40270	AT2G40270			0	0	1.44149	2.02663e-28
AT3G02880	KIN7		Probable inactive receptor kinase; Commonly-enriched candidate LPS-interacting PM-associated proteins from the three affinity chromatography systems with LPS chemotype Xcc 8530 as ligand.	0	0	1.43605	5.6489e-38
AT2G02390	GSTZ1	glutathione S-transferase zeta 1	Encodes glutathione transferase belonging to the zeta class of GSTs. Naming convention according to Wagner et al. (2002). The protein undergoes spontaneous thiolation following treatment with the oxidant tert-butylhydroperoxide. It functions in vitro as a maleylacetoacetate isomerase and is likely to be involved in tyrosine catabolism.	0	0	1.43205	1.28895e-45
AT1G35670	CDPK2	calcium-dependent protein kinase 2	Encodes a Ca(2+)-dependent, calmodulin-independent protein kinase that is rapidly induced by drought and high-salt stress but not by low-temperature stress or heat stress. Positive regulator of ABA signaling. Phosphorylates ABA responsive transcription factors ABF1 and ABF4.	0	0	1.42942	1.04985e-39
AT4G19200	GPRP3		Glycine and proline rich protein.Mutants have increased size.	0	0	1.42557	3.49048e-40
AT1G76520	PILS3			0	0	1.42318	4.45326e-46
AT1G10170	NFXL1	NF-X-like 1	Encodes AtNFXL1, a homologue of the putative human transcription repressor NF-X1. Functions as a negative regulator of the trichothecene phytotoxin-induced defense response.	0	0	1.42042	1.31367e-34
AT5G03380	AtHMP43			0	0	1.42023	3.18314e-47
AT2G30990	AT2G30990			0	0	1.4186	1.79899e-27
AT5G51070	ERD1	EARLY RESPONSIVE TO DEHYDRATION 1	ATP-dependent Clp protease regulatory subunit The mRNA is cell-to-cell mobile.	0.977373	1.47341e-17	1.41569	8.29434e-30
AT1G27130	GSTU13	glutathione S-transferase tau 13	Encodes glutathione transferase belonging to the tau class of GSTs. Naming convention according to Wagner et al. (2002). GSTU13 acts in the pathogen triggered pathway for indole glucosinolate metabolisms that involves also PENETRATION2 myrosinase. It is likely the enzyme that conjugates GSH with unstable indol-3-ylmethyl-ITCs formed upon PEN2-mediated IG hydrolysis, particularly in the branch of …	0.572845	5.26234e-07	1.41105	1.23298e-40
AT2G21620	RD2		Encodes gene that is induced in response to desiccation; mRNA expression is seen 10 and 24 hrs after start of desiccation treatment.	0.431816	4.20111e-05	1.40769	1.3989e-46
AT1G08630	THA1	threonine aldolase 1	Encodes a threonine aldolase, involved in threonine degradation to glycine. Primarily expressed in seeds and seedlings.	0	0	1.40203	2.40524e-16
AT4G33430	BAK1	BRI1-associated receptor kinase	Leu-rich receptor Serine/threonine protein kinase. Component of BR signaling that interacts with BRI1 in vitro and in vivo to form a heterodimer. Brassinolide-dependent association of BRI1 and BAK1 in vivo. Phosphorylation of both BRI1 and BAK1 on Thr residues was BR dependent. Although BAK1 and BRI1 alone localize in the plasma membrane, when BAK1 and BRI1 are coexpressed, the heterodimer BAK1/B…	0.348988	0.00151369	1.39574	7.47359e-40
AT2G22330	CYP79B3	cytochrome P450, family 79, subfamily B, polypeptide 3	Encodes a cytochrome P450. Involved in tryptophan metabolism. Converts Trp to indole-3-acetaldoxime (IAOx), a precursor to IAA and indole glucosinolates. The mRNA is cell-to-cell mobile.	1.53235	8.44761e-45	1.3945	8.02508e-35
AT1G80440	KFB20, KMD1		Encodes a member of a family of F-box proteins, called the KISS ME DEADLY (KMD) family, that targets type-B ARR proteins for degradation and is involved in the negative regulation of the cytokinin response. Also named as KFB20, a member of a group of Kelch repeat F-box proteins that negatively regulate phenylpropanoid biosynthesis by targeting the phenypropanoid biosynthesis enzyme phenylalanine …	0.371592	0.00112496	1.38597	3.32741e-32
AT5G44070	CAD1	CADMIUM SENSITIVE 1	Phytochelatin synthase gene confers tolerance to cadmium ions. Catalyzes phytochelatin (PC) synthesis from glutathione (GSH) in the presence of Cd2+, Zn2+, Cu2+ and Fe3+, but not by Co2+ or Ni2+. The mRNA is cell-to-cell mobile.	0.809277	3.43596e-09	1.38404	1.06672e-42
AT1G19670	CLH1	chlorophyllase 1	Chlorophyllase is the first enzyme involved in chlorophyll degradation. It catalyzes the hydrolysis of the ester bond to yield chlorophyllide and phytol. AtCLH1 lacks a typical signal sequence for the chloroplast. Its expression is induced rapidly by methyljasmonate, a known promoter of senescence and chlorophyll degradation.	2.50317	2.87751e-75	1.38269	1.89331e-13
AT3G58750	CSY2	citrate synthase 2	Encodes a peroxisomal citrate synthase that is expressed throughout seedling and shoot development.	0	0	1.3599	6.62456e-46
AT2G46330	AGP16	arabinogalactan protein 16	Encodes arabinogalactan protein (AGP16).	0	0	1.3596	1.83887e-35
AT5G48180	NSP5	nitrile specifier protein 5	Encodes a nitrile-specifier protein NSP5. NSP5 is one out of five (At3g16400/NSP1, At2g33070/NSP2, At3g16390/NSP3, At3g16410/NSP4 and At5g48180/NSP5) A. thaliana epithiospecifier protein (ESP) homologues that promote simple nitrile, but not epithionitrile or thiocyanate formation.	0	0	1.35885	7.54761e-18
AT3G13790	ATBFRUCT1		Encodes a protein with invertase activity.	-0.85339	2.11346e-08	1.35537	1.03862e-31
AT5G45350	GPRP2			0	0	1.35422	4.22107e-32
AT4G21580	AT4G21580			0	0	1.35022	1.02531e-37
AT1G09970	LRR XI-23		RLK7 belongs to a leucine-rich repeat class of receptor-likekinase (LRR-RLKs). It is involved in the control of germination speed and the tolerance to oxidant stress. The mRNA is cell-to-cell mobile.	0.991998	2.90892e-19	1.34857	1.6019e-32
AT2G27830	AT2G27830			1.15076	8.21695e-18	1.34645	8.60549e-45
AT4G26910	AT4G26910			0.336183	0.00350936	1.34413	3.99054e-33
AT4G23850	LACS4	long-chain acyl-CoA synthetase 4		0	0	1.33962	6.76932e-32
AT2G32240	PICC		PAMP induced protein involved in defense response. Interaction with UBAC2 proteins in the ER, is necessary for PAMP mediated accumulation of the callose synthase PMR4.	0	0	1.33935	2.72419e-33
AT5G58350	WNK4	with no lysine (K) kinase 4	Encodes a member of the WNK family (9 members in all) of protein kinases, the structural design of which is clearly distinct from those of other known protein kinases, such as receptor-like kinases and mitogen-activated protein kinases. Its transcription is under the control of circadian rhythms.	0.707929	6.46475e-06	1.3376	4.49782e-38
AT4G08470	MEKK3	MAPK/ERK kinase kinase 3	Encodes a member of the A1 subgroup of the MEKK (MAPK/ERK kinase kinase) family. MEKK is another name for Mitogen-Activated Protein Kinase Kinase Kinase (MAPKKK or MAP3K). This subgroup has four members: At4g08500 (MEKK1, also known as ARAKIN, MAP3Kb1, MAPKKK8), At4g08480 (MEKK2, also known as MAP3Kb4, MAPKKK9), At4g08470 (MEKK3, also known as MAP3Kb3, MAPKKK10) and At4g12020 (MEKK4, also known a…	0	0	1.32731	5.74044e-25
AT3G51670	PATL6		PATLs belong to a family of proteins having a Golgi dynamics (GOLD) domain in tandem with the Sec14p-like domain. PATLs are auxin regulated. Quadruple mutants (patl2456) show altered PIN1 lateralization in root endodermis cells.	0	0	1.32645	2.63652e-26
AT3G59660	BAGP1		Encodes a C2-GRAM domain-containing protein that is induced by B. cinerea infection. It is required for cleavage of BAG6 and thus plays a role in mediating resistance to fungal infection.	0	0	1.32121	5.52417e-27
AT3G46600	AT3G46600			0	0	1.3192	8.30526e-34
AT5G56350	AT5G56350			0	0	1.31636	2.74931e-44
AT1G21400	AT1G21400			-0.651534	5.03501e-09	1.30887	4.76727e-34
AT4G38550	AT4G38550			0.547811	4.84219e-07	1.30604	6.41013e-35
AT1G64710	AT1G64710			0	0	1.30558	1.08199e-28
AT4G23010	UTR2	UDP-galactose transporter 2		0	0	1.30502	5.19957e-28
AT5G24810	ABC1K11			0	0	1.29784	1.05627e-37
AT1G33600	AT1G33600			0.989804	9.15342e-13	1.29694	3.60883e-26
AT4G22470	AtDHyPRP1, DHyPRP1		Encodes a hybrid proline-rich protein that contains two tandem PRD-8CMs (proline-rich domain-eight cysteine motif) that is involved in systemic acquired resistance.	-0.911304	7.83662e-11	1.29448	2.40081e-11
AT1G33590	AT1G33590			0.752398	6.69181e-12	1.29389	2.80166e-33
AT4G31500	CYP83B1	cytochrome P450, family 83, subfamily B, polypeptide 1	Encodes an oxime-metabolizing enzyme in the biosynthetic pathway of glucosinolates. Is required for phytochrome signal transduction in red light. Mutation confers auxin overproduction.	1.27393	2.48345e-27	1.28758	6.03718e-26
AT1G23440	AT1G23440			0	0	1.2869	7.5912e-35
AT5G16970	AER	alkenal reductase	encodes a 2-alkenal reductase (EC 1.3.1.74), plays a key role in the detoxification of reactive carbonyls	-0.44005	3.60511e-05	1.28552	1.45324e-29
AT5G20960	AO1	aldehyde oxidase 1	Encodes aldehyde oxidase AA01.	0	0	1.28193	5.65809e-30
AT2G37970	SOUL-1			0	0	1.27714	8.79008e-23
AT5G64300	GCH	GTP cyclohydrolase II	encodes GTP cyclohydrolase II that can functionally complement E. coli mutant deficient in this gene. It also has 3,4-dihydroxy-2-butanone-4-phosphate synthase activity which makes it a bifunctional enzyme involved in the formation of the pyrimidine and of the carbohydrate from GTP and ribulose-5-phosphate, respectively The mRNA is cell-to-cell mobile.	0	0	1.27326	2.84844e-38
AT5G26030	FC1	ferrochelatase 1	encodes ferrochelatase I located in plastids. Involved in heme biosynthesis in non-photosynthetic tissues and induced by oxidative stress in photosynthetic tissues to supply heme for defensive hemoproteins The mRNA is cell-to-cell mobile.	0.818047	1.58852e-16	1.2732	2.25547e-38
AT1G01550	BPS1	BYPASS 1	Encodes a protein with no functionally characterized domains that to prevent the synthesis of a novel substance that moves from the root to the shoot, where it modifies shoot growth by interfering with auxin signaling. Synthesis and delivery of this substance requires neither phloem nor endodermis.	0.339118	0.00320028	1.27045	4.92371e-36
AT1G21100	IGMT1	indole glucosinolate O-methyltransferase 1		0	0	1.26828	5.42066e-30
AT5G40760	G6PD6	glucose-6-phosphate dehydrogenase 6	Encodes a cytosolic glucose-6-phosphate dehydrogenase that is insensitive to reduction by DTT and whose mRNA is expressed ubiquitously. The mRNA is cell-to-cell mobile.	0.348475	0.0103157	1.26298	6.57076e-16
AT2G22300	SR1	signal responsive 1	Encodes a putative CAM binding transcription factor. Loss of function mutations show enhanced resistance to fungal and bacterial pathogens suggesting that CAMTA functions to suppress defense responses.It acts in the cold response pathway, it can bind to and activate the expression of DREB1 genes.	0.888427	3.50814e-16	1.26209	3.36904e-34
AT1G48210	AT1G48210			0	0	1.26095	8.00346e-28
AT5G59420	ORP3C	OSBP(oxysterol binding protein)-related protein 3C		0.339792	0.00451719	1.25257	6.48317e-37
AT5G28540	BIP1		Encodes the luminal binding protein BiP, an ER-localized member of the HSP70 family. BiP is composed of an N-terminal ATP binding domain and a C-terminal domain that binds to hydrophobic patches on improperly/incompletely folded proteins in an ATP-dependent manner. Involved in polar nuclei fusion during proliferation of endosperm nuclei.	0	0	1.25248	5.02394e-21
AT1G55850	CSLE1	cellulose synthase like E1	encodes a protein similar to cellulose synthase The mRNA is cell-to-cell mobile.	0.520718	7.36888e-06	1.24939	6.54328e-37
AT4G34890	XDH1	xanthine dehydrogenase 1	Encodes a xanthine dehydrogenase, involved in purine catabolism. Ubiquitously expressed, but the transcript level is altered during aging, senescence, salt and cold stress, ABA treatment, and dark treatment. RNAi lines that suppress both XDH1 and XDH2 produce small plants with reduced fertility and accelerated leaf senescence. Role in drought tolerance.	0	0	1.2471	3.56696e-36
AT3G57330	ACA11	autoinhibited Ca2 -ATPase 11	Lesion mimic phenotype when mutation in the gene is combined with a mutation in ACA4. Lesion mimic phenotype of double knockout can be suppressed by nutritional supplements that increase anion levels (e.g. 15 mM Nitrate, Chloride, or Phosphate)	0.917802	3.07674e-12	1.24454	2.13044e-34
AT3G57550	AGK2	guanylate kinase	guanylate kinase	0	0	1.24241	9.98928e-28
AT2G01670	NUDT17	nudix hydrolase homolog 17		0.2705	0.0381848	1.24225	5.16917e-28
AT1G06570	PDS1	phytoene desaturation 1	Mutation of the PDS1 locus disrupts the activity of p-hydroxyphenylpyruvate dioxygenase (HPPDase), the first committed step in the synthesis of both plastoquinone and tocopherols in plants.	0	0	1.23793	5.49272e-22
AT5G05600	JAO2, JOX2		Encodes a protein with similarity to flavonol synthases that is involved in the detoxifcation polycyclic aromatic hydrocarbons.One of 4 paralogs encoding a 2-oxoglutarate/Fe(II)-dependent oxygenases that hydroxylates JA to 12-OH-JA.	0	0	1.23732	1.07614e-09
AT4G30790	ATG11		Encodes autophagy-related 2 (ATG11)	0	0	1.23649	7.08093e-21
AT4G25900	AT4G25900			0	0	1.23516	1.94442e-28
AT4G16760	ACX1	acyl-CoA oxidase 1	Encodes a medium to long-chain acyl-CoA oxidase. Catalyzes the first step of fatty acid beta-oxidation. Involved in jasmonate biosynthesis. Gene expression is induced by wounding, drought stress, abscisic acid, and jasmonate.	0.398951	0.00046051	1.23333	8.98424e-25
AT4G16660	HSP70			0	0	1.23235	2.2813e-22
AT3G52800	AT3G52800			0.6318	1.01548e-07	1.22788	1.15205e-18
AT1G77510	PDIL1-2	PDI-like 1-2	Encodes a protein disulfide isomerase-like (PDIL) protein, a member of a multigene family within the thioredoxin (TRX) superfamily. Transcript levels for this gene are up-regulated in response to three different chemical inducers of ER stress (dithiothreitol, beta-mercaptoethanol, and tunicamycin). AtIRE1-2 does not appear to be required for this response, but the atbzip60 mutant has a diminished…	0	0	1.22775	1.59369e-26
AT3G49110	PRXCA	peroxidase CA	Class III peroxidase Perx33. Expressed in roots. Located in the cell wall. Involved in cell elongation. Expression activated by light. May play a role in generating H2O2 during defense response. The mRNA is cell-to-cell mobile.	0	0	1.21962	5.75485e-15
AT4G30270	XTH24	xyloglucan endotransglucosylase/hydrolase 24	encodes a protein similar to endo xyloglucan transferase in sequence. It is also very similar to BRU1 in soybean, which is involved in brassinosteroid response.	0	0	1.21852	2.44739e-23
AT2G33150	PKT3	peroxisomal 3-ketoacyl-CoA thiolase 3	Encodes an organellar (peroxisome, glyoxysome) 3-ketoacyl-CoA thiolase, involved in fatty acid b-oxidation during germination and subsequent seedling growth. Mutants have defects in glyoxysomal fatty acid beta-oxidation. EC2.3.1.16 thiolase.	0	0	1.21632	1.21262e-25
AT3G53260	PAL2	phenylalanine ammonia-lyase 2	Encodes phenylalanine lyase. Arabidopsis has four PALs: AT2G37040 (PAL1), AT3G53260 (PAL2), AT5G04230 (PAL3) and AT3G10340 (PAL4).	0.55782	1.42076e-05	1.21197	5.02181e-22
AT2G24200	LAP1	leucyl aminopeptidase 1		0.479399	1.87713e-06	1.21165	5.07865e-26
AT1G22930	AT1G22930			0.507022	1.22021e-06	1.18702	1.85562e-26
AT1G37130	NIA2	nitrate reductase 2	Identified as a mutant resistant to chlorate. Encodes nitrate reductase structural gene. Involved in nitrate assimilation. Has nitrate reductase activity. Up-regulated by the fungus P. indica. Binds transcription factor At2g35940. The mRNA is cell-to-cell mobile.	0.490506	4.89458e-06	1.18081	2.14455e-22
AT5G46180	DELTA-OAT	ornithine-delta-aminotransferase	Encodes an ornithine delta-aminotransferase that is transcriptionally up-regulated in young seedlings and in response to salt stress. It is unlikely to play a role in salt-stress-induced proline accumulation, however, it appears to participate in arginine and ornithine catabolism.	0	0	1.17794	1.68626e-18
AT3G20410	CPK9	calmodulin-domain protein kinase 9	calmodulin-domain protein kinase CDPK isoform 9 (CPK9)	0	0	1.17742	4.64862e-35
AT2G41410	AT2G41410			0.74057	1.73919e-14	1.17706	1.51393e-26
AT4G29900	ACA10	autoinhibited Ca(2 )-ATPase 10	one of the type IIB calcium pump isoforms. encodes an autoinhibited Ca(2+)-ATPase that contains an N-terminal calmodulin binding autoinhibitory domain.	0.870607	6.70627e-16	1.17666	2.1393e-29
AT2G06530	VPS2.1			0.310154	0.0107505	1.17027	4.58625e-31
AT5G05140	AT5G05140			0	0	1.16966	5.72287e-23
AT5G12480	CPK7	calmodulin-domain protein kinase 7	calmodulin-domain protein kinase CDPK isoform 7 (CPK7)	0	0	1.16866	5.32653e-23
AT3G57530	CPK32	calcium-dependent protein kinase 32	Calcium-dependent Protein Kinase. ABA signaling component that regulates the ABA-responsive gene expression via ABF4. AtCPK32 has autophosphorylation activity and can phosphorylate ABF4 in vitro	0	0	1.16508	1.48557e-21
AT4G23470	AT4G23470			0	0	1.16202	4.82123e-29
AT3G60190	DL1E	DYNAMIN-like 1E	At3g60190 encodes Arabidopsis dynamin-related protein 1E, DRP1E, also known as EDR3, ADL4 and ADL1E, which is 624 amino acid residues long, has a predicted mass of 69.8 kDa and a pI of 7.5. Dynamin-related protein 1E belongs to a plant-specific subclass of dynamin-related proteins (DRP1), consisting of five members in Arabidopsis (A, B, C, D, E). This class is characterized by having an N-termina…	0	0	1.15885	4.85464e-32
AT1G17500	ALA4		ATPase E1-E2 type family protein / haloacid dehalogenase-like hydrolase family protein. ALA4 acts redundantly with ALA3, ALA5, ALA9, ALA10 and ALA11 in root and shoot development	0	0	1.14865	2.66322e-17
AT4G28300	FLOE1		Encodes a protein with 13.6% proline amino acids that is predicted to localize to the cell wall. The mRNA is cell-to-cell mobile.	0.290922	0.0357443	1.14661	1.94442e-28
AT4G34460	AGB1	GTP binding protein beta 1	Encodes the heterotrimeric G-protein beta subunit and is involved in organ shape. A significant fraction of the protein is found in the ER. Mutants carrying null alleles express similar fruit phenotypes, as seen in er plants, but differ from er in that the stem is only slightly shorter than that in the wild type, the pedicel is slightly longer than that in the wild type, and the leaves are rounde…	0	0	1.1424	1.24969e-31
AT5G22630	ADT5	arogenate dehydratase 5	Encodes a plastid-localized arogenate dehydratase involved in phenylalanine biosynthesis. Not less than six genes encoding ADT were identi&#64257;ed in the Arabidopsis genome: ADT1 [At1g11790]; ADT2 [At3g07630]; ADT3 [At2g27820]; ADT4 [At3g44720]; ADT5 [At5g22630]; and ADT6 [At1g08250]. The mRNA is cell-to-cell mobile.	0.424036	0.000342815	1.13875	8.84899e-26
AT5G64260	EXL2	EXORDIUM like 2		0.654634	5.09957e-10	1.13403	3.34214e-21
AT1G34370	STOP1	sensitive to proton rhizotoxicity 1	Encodes a putative nuclear Cys(2)His(2)-type zinc finger protein involved in H+ and Al3+ rhizotoxicity. In mutants exposed to aluminum stress, there is no induction of AtALMT1, an malate transporter known to be involved in the mediation of aluminum toxicity. Cell wall of the mutant is unstable in low pH medium (pH 4.5) in low Ca solution. This would mediate Ca-alleviation of low pH stress through…	0.51601	4.2993e-07	1.13192	9.82422e-24
AT1G26270	AT1G26270			0	0	1.12993	1.19755e-24
AT1G62740	Hop2	Hop2	Encodes one of the 36 carboxylate clamp (CC)-tetratricopeptide repeat (TPR) proteins (Prasad 2010, Pubmed ID: 20856808) with potential to interact with Hsp90/Hsp70 as co-chaperones. The mRNA is cell-to-cell mobile.	0	0	1.1292	9.42673e-20
AT1G73260	KTI1	kunitz trypsin inhibitor 1	Encodes a trypsin inhibitor involved in modulating programmed cell death in plant-pathogen interactions.	-1.12967	4.62186e-15	1.12719	8.42922e-15
AT1G58360	AAP1	amino acid permease 1	Encodes AAP1 (amino acid permease 1), a neutral amino acid transporter expressed in seeds. Functions in amino acid uptake into embryos. The transporter also functions in acquisition of glutamate and neutral amino acids by the root.	0	0	1.12709	5.41892e-14
AT1G65845	AT1G65845			0	0	1.12321	1.4898e-18
AT4G34180	CYCLASE1		Encodes a cyclase-family protein that is a negative regulator of cell death that regulates pathogen-induced symptom development.	0.530828	2.08866e-07	1.12215	1.7104e-29
AT5G42530	AT5G42530			0.746159	1.32539e-07	1.11964	6.45338e-22
AT2G14750	APK	APS kinase	Encodes adenosine-5'-phosphosulfate kinase. Provides activated sulfate for sulfation of secondary metabolites, including the glucosinolates. Essential for pollen viability. The mRNA is cell-to-cell mobile.	0.978773	1.63351e-13	1.11461	5.42885e-20
AT3G62600	ATERDJ3B		J domain protein localized in ER lumen. Can partially compensate for the growth defect in jem1 scj1 mutant yeast. Forms a complex SDF2-ERdj3B-BiP that is required for the proper accumulation of the surface-exposed leucine-rich repeat receptor kinases EFR. EFR is involved in PAMP (pathogen associated molecular patterns) triggered immunity.	0	0	1.11235	1.33593e-23
AT3G13330	PA200	proteasome activating protein 200	Encodes a protein that interacts with the 26S proteasome. Mutants are phenotypically indistinguishable from wild type plants under a variety of growth conditions. Protein levels increase upon exposure of seedlings to MG132, a specific, potent, reversible, and cell-permeable proteasome inhibitor.	0	0	1.11222	1.70923e-25
AT1G18210	AT1G18210			0.572777	3.80304e-08	1.10992	6.97833e-32
AT3G54620	BZIP25	basic leucine zipper 25	bZIP transcription factor-like protein mRNA	0.476712	7.82694e-06	1.10417	3.8286e-31
AT1G13260	RAV1	related to ABI3/VP1 1	Encodes an AP2/B3 domain transcription factor which is upregulated in response to low temperature. It contains a B3 DNA binding domain. It has circadian regulation and may function as a negative growth regulator. The mRNA is cell-to-cell mobile.	0	0	1.10049	7.6288e-26
AT4G25670	DOB1			0	0	1.09806	4.01096e-21
AT2G16500	ADC1	arginine decarboxylase 1	Encodes a arginine decarboxylase (ADC), a rate-limiting enzyme that catalyzes the first step of polyamine (PA) biosynthesis via ADC pathway in Arabidopsis thaliana. Arabidopsis genome has two ADC paralogs, ADC1 and ADC2. Double mutant analysis showed that ADC genes are essential for the production of PA, and are required for normal seed development. Promoter region of ADC1 contains 742-bp AT-rich…	0.340896	0.00318731	1.09585	7.38365e-22
AT4G34138	UGT73B1	UDP-glucosyl transferase 73B1		0	0	1.09006	1.44888e-16
AT5G38530	TSBtype2	tryptophan synthase beta type 2	TSBtype2 encodes a type 2 tryptophan synthase beta subunit that catalyzes a condensation reaction between serine and indole to generate tryptophan.It appears to form a homodimer. Its biological role has not yet been determined, but it has a very high affinity for indole which may be involved in allowing TSBtype2 to carefully limit free indole build-up. But, to date no overall change in plant morp…	0	0	1.08934	1.57208e-14
AT4G33300	ADR1-L1	ADR1-like 1	Encodes a member of the ADR1 family nucleotide-binding leucine-rich repeat (NB-LRR) immune receptors.	0.455674	0.000128292	1.08888	2.90165e-25
AT5G04170	AT5G04170			0	0	1.08415	3.0463e-30
AT2G17840	ERD7	EARLY-RESPONSIVE TO DEHYDRATION 7	Identified as drought-inducible gene by differential hybridization. Upregulated by high light, drought, cold and salt stress determined by microarray analysis.	0.299226	0.0437624	1.08344	7.25484e-24
AT3G28180	CSLC04	Cellulose-synthase-like C4	encodes a gene similar to cellulose synthase The mRNA is cell-to-cell mobile.	0.816571	4.45296e-08	1.08111	4.81486e-22
AT4G24920	AT4G24920			0	0	1.07637	9.40267e-16
AT1G32640	MYC2		Encodes a MYC-related transcriptional activator with a typical DNA binding domain of a basic helix-loop-helix leucine zipper motif. Binds to an extended G-Box promoter motif and interacts with Jasmonate ZIM-domain proteins. MYC2 interacts with EIN3 and EIL1 to repress hook curvature and resistance to Botrytis cinera.Its transcription is induced by dehydration stress, ABA treatment and blue light …	1.80612	7.65489e-62	1.0696	1.28083e-12
AT1G01470	LEA14	LATE EMBRYOGENESIS ABUNDANT 14	Encodes late-embryogenesis abundant protein whose mRNA levels are induced in response to wounding and light stress. Might be involved in protection against desiccation.	0	0	1.06916	2.68013e-15
AT5G04410	NAC2	NAC domain containing protein 2	NAC family member, functions as a transcriptional activator, regulates flavonoid biosynthesis under high light. The mRNA is cell-to-cell mobile.	0	0	1.06912	4.23043e-26
AT4G36040	J11	DnaJ11		0	0	1.06767	9.06165e-16
AT3G47730	ABCA2	ATP-binding cassette A2	member of ATH subfamily	0	0	1.06534	9.02244e-16
AT5G35200	PICALM3			0	0	1.06514	2.46205e-25
AT5G18480	PGSIP6	plant glycogenin-like starch initiation protein 6	Encodes an IPC (inositol phosphorylceramide) glucuronosyltransferase. Defects in transmission via the pollen are evident but the defect in transmission through the male gametophyte is not due to improper pollen development or inability of pollen tubes to germinate and grow. Using a pollen specific complementation strategy to obtain homozygotes, loss of function results in constitutive hypersensit…	0	0	1.06471	1.139e-20
AT4G35310	CPK5	calmodulin-domain protein kinase 5	calmodulin-domain protein kinase CDPK isoform 5 (CPK5)	0.239993	0.0483393	1.06379	9.12648e-28
AT1G23870	TPS9	trehalose-phosphatase/synthase 9	Encodes an enzyme putatively involved in trehalose biosynthesis. The protein has a trehalose synthase (TPS)-like domain that may or may not be active as well as a trehalose phosphatase (TPP)-like domain. The mRNA is cell-to-cell mobile.	0	0	1.06038	2.10304e-23
AT3G02360	PGD2			0.378416	0.000187604	1.05896	8.1354e-24
AT5G28050	GSDA			-0.364421	0.00254827	1.05853	5.88415e-24
AT2G37040	PAL1	PHE ammonia lyase 1	Encodes PAL1, a phenylalanine ammonia-lyase. Arabidopsis has four PALs: AT2G37040 (PAL1), AT3G53260 (PAL2), AT5G04230 (PAL3) and AT3G10340 (PAL4).	0	0	1.05194	4.30672e-13
AT3G44630	AT3G44630			0	0	1.05105	2.2552e-16
AT5G21940	AT5G21940			0	0	1.04731	1.61819e-20
AT5G54940	AT5G54940			0.41077	5.56483e-05	1.04145	4.27539e-21
AT1G10410	AT1G10410			0	0	1.04083	1.23154e-16
AT1G79690	NUDT3	nudix hydrolase homolog 3		0.460139	0.000133792	1.03937	1.31943e-23
AT3G10985	SAG20	senescence associated gene 20	A senescence-associated gene whose expression is induced in response to treatment with Nep1, a fungal protein that causes necrosis. The mRNA is cell-to-cell mobile.	0.265489	0.0490803	1.03701	6.50669e-19
AT5G13800	PPH	pheophytinase	Encodes a pheophytinase that is involved in chlorophyll breakdown. Its transcript levels increase during senescence and pph-1 mutants have a stay-green phenotype.	0	0	1.03554	1.0259e-20
AT3G23530	AT3G23530			0	0	1.03109	2.73747e-24
AT2G05380	GRP3S	glycine-rich protein 3 short isoform	glycine-rich protein 3 short isoform (GRP3S) mRNA, complete The mRNA is cell-to-cell mobile.	0.376377	0.0111936	1.02789	2.68326e-14
AT5G40780	LHT1	lysine histidine transporter 1	Encodes LHT1 (lysine histidine transporter), a high-affinity transporter for cellular amino acid uptake in both root epidermis and leaf mesophyll.	-1.06518	3.13872e-10	1.02789	5.89539e-13
AT3G15210	ERF4	ethylene responsive element binding factor 4	Encodes a member of the ERF (ethylene response factor) subfamily B-1 of ERF/AP2 transcription factor family (ATERF-4). The protein contains one AP2 domain. Acts as a negative regulator of JA-responsive defense gene expression and resistance to the necrotrophic fungal pathogen Fusarium oxysporum and antagonizes JA inhibition of root elongation. The mRNA is cell-to-cell mobile.	0.609959	4.28946e-08	1.02681	1.19091e-19
AT2G45300	AT2G45300		encodes 3-phosphoshikimate 1-carboxyvinyltransferase / 5-enolpyruvylshikimate-3-phosphate / EPSP synthase involved in chorismate biosynthesis The mRNA is cell-to-cell mobile.	0.35418	0.00218265	1.02564	4.75916e-21
AT4G37610	BT5	BTB and TAZ domain protein 5	BTB and TAZ domain protein. Located in cytoplasm and expressed in fruit, flower and leaves.	-0.314975	0.0184687	1.0225	4.49324e-14
AT5G21090	AT5G21090			0	0	1.02201	8.31085e-17
AT5G39590	OXR5			0	0	1.02171	3.84923e-27
AT1G29340	PUB17	plant U-box 17	Encodes a protein containing a UND, a U-box, and an ARM domain. This protein has E3 ubiquitin ligase activity. It is required for cell death and full resistance specified by Arabidopsis RPM1 and RPS4 resistance proteins against Pseudomonas syringae pv tomato. The mRNA is cell-to-cell mobile.	0	0	1.02134	6.6893e-16
AT1G12360	KEU	keule	encodes a Sec1 protein and expressed throughout the plant. physically interacts with Syntaxin1 and is required for cytokinesis.	0	0	1.01717	7.77038e-28
AT4G21990	APR3	APS reductase 3	Encodes a protein disulfide isomerase-like (PDIL) protein, a member of a multigene family within the thioredoxin (TRX) superfamily. This protein also belongs to the adenosine 5'-phosphosulfate reductase-like (APRL) group.	0.551617	1.70225e-06	1.01534	4.75779e-14
AT3G47250	AT3G47250			0.681717	8.48631e-08	1.01437	5.08271e-21
AT2G47800	ABCC4	ATP-binding cassette C4	Encodes a plasma membrane localized ATPase transporter involved in multidrug transport. The expression of this gene is upregulated by herbicide safeners such as benoxacor, fluxofenim and fenclorim. The mRNA is cell-to-cell mobile.	0	0	1.01299	7.85327e-19
AT1G64950	CYP89A5	cytochrome P450, family 89, subfamily A, polypeptide 5	member of CYP89A The mRNA is cell-to-cell mobile.	0	0	1.0082	1.51267e-17
AT5G37740	AT5G37740			0	0	1.00668	1.04457e-13
AT4G23270	CRK19	cysteine-rich RLK (RECEPTOR-like protein kinase) 19	Encodes a cysteine-rich receptor-like protein kinase. The mRNA is cell-to-cell mobile.	0	0	1.0047	1.39752e-20
AT3G08640	RER3			0	0	1.00174	1.79775e-15
AT1G48300	DGAT3	diacylglycerol acyltransferase 3	Cytosolic iron-sulfur protein with a [2Fe-2S] cluster which synthesizes triacylglycerol (DGAT activity).	1.01523	3.85819e-26	0.960846	1.52415e-16
AT3G62010	AT3G62010			1.17281	7.97818e-25	0.932483	1.92728e-19
AT3G25770	AOC2	allene oxide cyclase 2	Encodes allene oxide cyclase. One of four genes in Arabidopsis that encode this enzyme, which catalyzes an essential step in jasmonic acid biosynthesis. Gene expression is induced during senescence, a process that involves jasmonic acid signalling pathway. Note: Nomenclature for Arabidopsis allene oxide cyclase 2 (AOC2, AT3G25770) gene is based on Stenzel et al. 2003 Plant Molecular Biology 51:89…	1.0384	8.35911e-22	0.717217	0.000241548
AT1G78460	AT1G78460			1.03109	1.06477e-10	0.361799	0.000236091
AT2G20670	AT2G20670			-1.13267	2.94278e-21	0.339688	0.00252252
AT1G18270	AT1G18270			-1.25753	1.5869e-32	0.232518	0.0146603
AT2G14170	ALDH6B2	aldehyde dehydrogenase 6B2	Arabidopsis thaliana methylmalonate-semialdehyde dehydrogenase	-1.15366	1.39157e-34	-0.192235	0.0449593
AT3G02468				-1.03649	8.3317e-19	-0.426884	0.0115423
AT5G01810	CIPK15	CBL-interacting protein kinase 15	Encodes a CBL-interacting serine/threonine protein kinase, also has similarities to SOS2 kinase.	-1.45784	9.68499e-48	-0.428908	4.90778e-05
AT1G67480	AT1G67480			-1.22366	6.3571e-28	-0.450067	2.78375e-05
AT5G49360	BXL1	beta-xylosidase 1	Encodes a bifunctional {beta}-D-xylosidase/{alpha}-L-arabinofuranosidase required for pectic arabinan modification. Located in the extracellular matrix. Gene is expressed specifically in tissues undergoing secondary wall thickening. This is a member of glycosyl hydrolase family 3 and has six other closely related members.	-1.01394	1.19362e-11	-0.489031	4.43649e-05
AT3G19930	STP4	sugar transporter 4	Encodes a sucrose hydrogen symporter that is induced by wounding. The mRNA is cell-to-cell mobile.	-2.01864	1.20578e-43	-0.527615	1.41422e-06
AT1G11260	STP1	sugar transporter 1	Encodes a H+/hexose cotransporter. The mRNA is cell-to-cell mobile.	-1.7539	8.69075e-32	-0.641858	2.43962e-08
AT5G18670	BMY3	beta-amylase 3	putative beta-amylase BMY3 (BMY3)	-1.07649	1.03999e-19	-0.70562	3.04563e-11
AT1G62480	AT1G62480			-1.20225	1.13228e-29	-0.789472	3.60037e-14
AT5G63600	FLS5	flavonol synthase 5	encodes a protein whose sequence is similar to flavonol synthase	-1.02372	1.19919e-17	-0.902911	2.80298e-14
AT1G72150	PATL1	PATELLIN 1	novel cell-plate-associated protein that is related in sequence to proteins involved in membrane trafficking in other eukaryotes The mRNA is cell-to-cell mobile.	-1.1877	4.0353e-16	-0.917652	8.17096e-15
AT4G16990	RLM3	RESISTANCE TO LEPTOSPHAERIA MACULANS 3		-1.00298	4.01942e-21	-0.920505	2.19521e-19
AT1G42550	PMI1	PLASTID MOVEMENT IMPAIRED1	Encodes a plant-specific protein of unknown function that appears to be conserved among angiosperms. The mRNA is cell-to-cell mobile.	-0.27773	0.0202179	-1.00063	2.08195e-15
AT3G56910	PSRP5	plastid-specific 50S ribosomal protein 5	Encodes PSRP5 (PLASTID-SPECIFIC 50S RIBOSOMAL PROTEIN 5). Functions in plastid translation.	0	0	-1.00198	4.07333e-13
AT3G52960	PrxIIE			0.355293	0.00280009	-1.00278	7.01348e-17
AT5G07090	AT5G07090			0	0	-1.00338	8.09078e-24
AT3G60320	NRG2			0	0	-1.00365	1.97869e-14
AT1G09310	AT1G09310			0	0	-1.00395	1.18941e-18
AT2G20890	PSB29	photosystem II reaction center PSB29 protein	Chloroplast-localized Thylakoid formation1 gene product involved in vesicle-mediated formation of thylakoid membranes. Thf1 antisense lines contain abnormal chloroplasts early in leaf development (chloroplasts have loosely stacked thylakoid membranes). Expression was induced in the light and decreased under dark conditions. G-alpha interaction partner that functions downstream of the plasma membr…	0	0	-1.00544	3.79509e-16
AT5G14910	AT5G14910			0	0	-1.00586	3.56536e-17
AT1G67090	RBCS1A	ribulose bisphosphate carboxylase small chain 1A	Encodes a member of the Rubisco small subunit (RBCS) multigene family: RBCS1A (At1g67090), RBCS1B (At5g38430), RBCS2B (At5g38420), and RBCS3B (At5g38410). Functions to yield sufficient Rubisco content for leaf photosynthetic capacity.	0	0	-1.00648	5.60101e-12
AT3G54210	PRPL17			0	0	-1.009	2.81977e-16
AT1G09690	AT1G09690			0	0	-1.00931	3.40078e-22
AT4G21750	ATML1	MERISTEM LAYER 1	Encodes a homeobox protein similar to GL2. It is expressed in both the apical and basal daughter cells of the zygote as well as their progeny. Expression is detected starting the two-celled stage of embryo development and is later restricted to the outermost, epidermal cell layer from its inception. Its promoter is highly modular with each region contributing to specific aspects of the gene's spa…	-0.437592	0.0018616	-1.01027	1.01148e-12
AT4G32940	GAMMA-VPE	gamma vacuolar processing enzyme	Encodes a vacuolar processing enzyme belonging to a novel group of cysteine proteinases that is expressed in vegetative organs and is upregulated in association with various types of cell death and under stressed conditions. They are essential in processing seed storage proteins and for mediating the susceptible response of toxin-induced cell death.	0	0	-1.0104	2.60427e-23
AT4G23890	NdhS	NADH dehydrogenase-like complex S		0	0	-1.01144	2.35492e-11
AT4G18100	AT4G18100			0	0	-1.01148	1.49301e-21
AT4G18730	RPL16B	ribosomal protein L16B	encodes a cytosolic ribosomal protein L16, which is a constituent of 60S large ribosomal complex. Gene is expressed in root and shoot apical meristems and in lateral root primordia. Expression in lateral root primordia is induced by auxin.	0	0	-1.01199	1.25239e-20
AT3G18390	EMB1865	embryo defective 1865		0	0	-1.01244	2.95538e-14
AT4G33580	BCA5	beta carbonic anhydrase 5		0	0	-1.01251	1.80104e-17
AT2G47400	CP12-1	CP12 domain-containing protein 1	CP12-1 encodes a small peptide found in the chloroplast stroma. It belongs to the CP12 gene family thought to be involved in the formation of a supramolecular complex with glyceraldehyde-3-phosphate dehydrogenase (GAPDH) and phosphoribulokinase (PRK) embedded in the Calvin cycle. The mRNA is cell-to-cell mobile.	0	0	-1.01288	4.82871e-17
AT1G12800	SDP		SDP is a chloroplast localized RNA binding protein that is required for plastid rRNA processing. Plants harboring a mutation in SDP have numerous defects including reduced chlorophyll content, poor growth, yellow leaves and abnormal chloroplasts.	0	0	-1.01407	1.11066e-19
AT3G04840	AT3G04840			0	0	-1.01435	7.49668e-22
AT1G78040	AT1G78040			-0.769935	9.17521e-13	-1.01531	2.48758e-18
AT1G29910	CAB3	chlorophyll A/B binding protein 3	member of Chlorophyll a/b-binding protein family	0	0	-1.016	1.45559e-10
AT1G43670	FBP	fructose-1,6-bisphosphatase	Encodes a fructose-1,6-bisphosphatase. This enzyme, in addition to catalyzing the formation of fructose-6-phosphate for sucrose biosynthesis, appears to play a role in fructose-mediated signaling that is independent of its enzymatic activity. atcfbp-1/fins1 mutants have reduced photosynthetic rates, elevated levels of starch and reduced levels of sucrose during the day. Although the protein is ex…	-0.333359	0.00117384	-1.01763	5.15003e-19
AT1G51805	SIF3			-0.619033	0.000376591	-1.01766	1.98298e-16
AT3G10230	LYC	lycopene cyclase	Encodes a protein with lycopene &#946;-cyclase activity. This enzyme uses the linear, symmetrical lycopene as substrate. However, unlike the &#949;-cyclase which adds only one ring, the &#946;-cyclase introduces a ring at both ends of lycopene to form the bicyclic &#946;-carotene.	0	0	-1.01851	2.44293e-14
AT5G65630	GTE7	global transcription factor group E7	This gene is predicted to encode a bromodomain-containing protein. Plant lines expressing RNAi constructs targeted against GTE7 show some resistance to agrobacterium-mediated root transformation.	-0.437009	0.00048571	-1.01861	1.26849e-17
AT3G62250	UBQ5	ubiquitin 5		0	0	-1.01915	1.03528e-23
AT1G49600	RBP47A	RNA-binding protein 47A		-0.404832	0.000116055	-1.01952	6.83533e-16
AT5G51820	PGM	phosphoglucomutase	Encodes a plastid isoform of the enzyme phosphoglucomutase involved in controlling photosynthetic carbon flow. Effective petiole movement against the direction of the gravity requires functional PGM activity that is required for full development of amyloplasts.	0.486149	5.65335e-06	-1.01962	1.99905e-20
AT4G16720	AT4G16720			0	0	-1.02013	2.72879e-24
AT1G10960	FD1	ferredoxin 1	Phosphatidylinositol 4-phosphate 5-kinase (PIP5K) enzyme family member.	0.299523	0.0248991	-1.02132	9.22398e-19
AT2G37660	AT2G37660			0	0	-1.02183	2.93257e-17
AT2G05070	LHCB2.2	photosystem II light harvesting complex gene 2.2	Encodes Lhcb2.2. Belongs to the Lhc super-gene family encodes the light-harvesting chlorophyll a/b-binding (LHC) proteins that constitute the antenna system of the photosynthetic apparatus.	0	0	-1.02204	3.11426e-06
AT3G09820	ADK1	adenosine kinase 1	Involved in the salvage synthesis of adenylates and methyl recycling	0	0	-1.02241	4.87932e-18
AT4G25570	ACYB-2		Encodes cytochrome b561.	-0.328508	0.0109346	-1.0231	1.37204e-25
AT5G05170	CEV1	CONSTITUTIVE EXPRESSION OF VSP 1	Encodes a cellulose synthase isomer. CESA3 mutants have cellulose defect in the primary cell wall. Multiple lines of evidence suggest that CESA3, along with CESA1 and CESA6 are present in the same plasma membrane complex for cellulose biosynthesis. As inferred from the null role of secondary wall-type CesAs, included in a set of five primary wall-type CesAs that may support trichome cell wall thi…	-0.747124	3.59333e-09	-1.02402	1.82728e-20
AT4G38740	ROC1	rotamase CYP 1	Encodes cytosolic cyclophilin ROC1.	0	0	-1.02476	3.69698e-24
AT1G29470	AT1G29470			-0.762455	3.60942e-09	-1.02758	6.90077e-25
AT2G01420	PIN4	PIN-FORMED 4	Encodes a putative auxin efflux carrier that is localized in developing and mature root meristems. It is involved in the maintenance of embryonic auxin gradients. A role for AtPIN4 in generating a sink for auxin below the quiescent center of the root meristem that is essential for auxin distribution and patterning is proposed. In the root, PIN4 is detected around the quiescent center and cells su…	-0.352959	0.0170143	-1.02829	4.62655e-17
AT3G23820	GAE6	UDP-D-glucuronate 4-epimerase 6	Encodes a UDP-D-glucuronate 4-epimerase involved in pectin biosynthesis in the cell wall and affects cell wall integrity and immunity to fungi and bacteria. The mRNA is cell-to-cell mobile.	-0.61572	1.43282e-06	-1.02865	5.92193e-19
AT1G15820	LHCB6	light harvesting complex photosystem II subunit 6	Lhcb6 protein (Lhcb6), light harvesting complex of photosystem II.	0	0	-1.0287	1.03904e-08
AT3G52500	AT3G52500			-0.719295	1.31715e-10	-1.03197	2.71142e-23
AT1G48830	AT1G48830			0	0	-1.03494	4.12835e-17
AT1G23080	PIN7	PIN-FORMED 7	Encodes a novel component of auxin efflux that is located apically in the basal cell and is involved during embryogenesis in setting up the apical-basal axis in the embryo. It is also involved in pattern specification during root development. In roots, it is expressed at lateral and basal membranes of provascular cells in the meristem and elongation zone, whereas in the columella cells it coincid…	-0.41565	0.00298513	-1.03681	9.01422e-24
AT5G22500	FAR1	fatty acid reductase 1	Encodes a member of the eight-member gene family encoding alcohol-forming fatty acyl-CoA reductases (FARs) identified in Arabidopsis thaliana. Three of the FARs, FAR1 (At5g22500), FAR4 (At3g44540) and FAR5 (At3g44550), are shown to generate the fatty alcohols found in root, seed coat, and wound-induced leaf tissue.	-1.06104	7.95867e-11	-1.04097	2.94724e-18
AT1G52230	PSAH2	photosystem I subunit H2	Phosphorylation of this protein is dependent on calcium. The mRNA is cell-to-cell mobile.	0	0	-1.04164	3.19627e-12
AT5G19780	TUA5	tubulin alpha-5	Encodes an isoform of alpha tubulin. Closely related to adjacent gene TUA3 suggesting recent duplication. The mRNA is cell-to-cell mobile.	-0.544045	1.24546e-06	-1.04524	1.55111e-23
AT2G05710	ACO3	aconitase 3	Encodes an aconitase that can catalyze the conversion of citrate to isocitrate through a cis-aconitate intermediate, indicating that it may participate in the TCA cycle and other primary metabolic pathways. The protein is believed to accumulate in the mitochondria and the cytosol. It affects CSD2 (At2g28190 - a superoxide dismutase) transcript levels and may play a role in the response to oxidati…	0	0	-1.04664	1.51987e-20
AT5G58250	EMB3143	EMBRYO DEFECTIVE 3143	Involved in tetrapyrrole biosynthesis. May function as a scaffold protein to stabilize CHL27.	0.253249	0.0343611	-1.04722	7.7265e-11
AT4G00430	PIP1;4	plasma membrane intrinsic protein 1;4	a member of the plasma membrane intrinsic protein subfamily PIP1.	0	0	-1.04798	3.52016e-23
AT2G43910	HOL1	HARMLESS TO OZONE LAYER 1		-0.430853	9.75873e-05	-1.04979	7.67739e-18
AT3G27830	RPL12-A	ribosomal protein L12-A	50S ribosomal protein L12-A The mRNA is cell-to-cell mobile.	0	0	-1.05007	4.36311e-16
AT3G51950	AT3G51950		Contains single CCCH domain.	0	0	-1.05016	8.27415e-28
AT5G25460	DGR2	DUF642 L-GalL responsive gene 2	Encodes a DUF642 cell wall protein.	-0.510898	0.000828855	-1.05394	4.0374e-20
AT5G66190	FNR1	ferredoxin-NADP( )-oxidoreductase 1	Encodes a leaf-type ferredoxin:NADP(H) oxidoreductase. It is present in both chloroplast stroma and thylakoid membranes but is more abundant in the thylakoid. The affinity of this enzyme for ferredoxin is slightly, but significantly, higher than AtLFNR2, an isoform of the same enzyme. AtLFNR1 forms a heterodimer with AtFNR2 and is also a prerequisite to attach AtFNR2 to the thylakoid membrane.	0	0	-1.05486	6.05378e-17
AT3G23390	RPL36aA			0	0	-1.05492	3.80876e-11
AT5G35790	G6PD1	glucose-6-phosphate dehydrogenase 1	Encodes a plastidic glucose-6-phosphate dehydrogenase that is sensitive to reduction by DTT and whose mRNA is more prevalent in developing organs but absent in the root.	0	0	-1.05505	2.07859e-18
AT1G30360	ERD4	early-responsive to dehydration 4		-0.474422	0.00233228	-1.0563	5.79358e-19
AT1G07110	F2KP	fructose-2,6-bisphosphatase	Encodes the bifunctional enzyme fructose-6-phosphate 2-kinase/fructose-2,6-bisphosphatase.	-0.232395	0.0429717	-1.05752	2.15626e-25
AT4G09010	TL29	thylakoid lumen 29	Encodes a thylakoid lumen protein that was initially believed to act as a microsomal ascorbate peroxidase APX4 but to date, no evidence of enzymatic activity has been found.	0	0	-1.05881	4.81334e-12
AT3G01690	AT3G01690			0	0	-1.05918	1.66886e-26
AT3G50820	PSBO2	photosystem II subunit O-2	Encodes a protein which is an extrinsic subunit of photosystem II and which has been proposed to play a central role in stabilization of the catalytic manganese cluster. In <i>Arabidopsis thaliana</i> the PsbO proteins are encoded by two genes: <i>psbO1</i> and <i>psbO2</i>. PsbO2 is the minor isoform in the wild-type. Mutants defective in this gene have been shown to be affected in the dephospho…	0	0	-1.05952	1.47069e-11
AT3G16000	MFP1	MAR binding filament-like protein 1	Encodes a DNA-binding protein that binds to plastid DNA non-specifically and is associated with nucleoids and thylakoid membranes. The expression of the gene is correlated with the development of thylakoid membranes.MFP1 is required for the normal initiation of starch granules in Arabidopsis chloroplasts. Mutants lacking MFP1 have fewer starch granules per chloroplast relative to wild-type plants…	0	0	-1.06083	2.0017e-20
AT5G04590	SIR	sulfite reductase	A.thaliana gene encoding sulfite reductase.	0	0	-1.06294	3.33408e-17
AT1G10760	SEX1	STARCH EXCESS 1	Encodes an &#945;-glucan, water dikinase required for starch degradation. Involved in cold-induced freezing tolerance. Mutations that eliminate the GWD protein or affect the dikinase domain of the enzyme dramatically reduce both the amount of phosphate in the amylopectin and the rate of starch degradation. Mature leaves of these mutants accumulate amounts of starch up to seven times greater than …	0	0	-1.06465	6.22904e-26
AT4G34870	ROC5	rotamase cyclophilin 5	belongs to cyclophilin family	0	0	-1.06687	1.23777e-22
AT5G43060	RD21B	esponsive to dehydration 21B	Peptidase, activity detected in extracts of root, leaf and cell culture.	-0.498222	2.8878e-05	-1.06705	3.09192e-24
AT5G40950	RPL27	ribosomal protein large subunit 27		0	0	-1.06741	6.69522e-21
AT1G45474	Lhca5	photosystem I light harvesting complex gene 5	Encodes a component of the light harvesting complex of photosystem I.	0	0	-1.06747	2.6889e-14
AT5G67385	NCH1			0	0	-1.06758	3.66301e-21
AT2G29630	THIC	thiaminC	Encodes a protein involved in thiamine biosynthesis. The protein is an iron-sulfur cluster protein predicted to catalyze the conversion of 5-aminoimidazole ribonucleotide (AIR) to hydroxymethylpyrimidine phosphate (HMP-P). A severe reduction of THIC levels in plants decreases vitamin B1 (thiamin diphosphate (TPP)) levels and also leads to changes in the levels of numerous other metabolites since …	0.448817	9.60473e-05	-1.06804	5.29814e-17
AT5G47780	GAUT4	galacturonosyltransferase 4	Encodes a protein with putative galacturonosyltransferase activity. The mRNA is cell-to-cell mobile.	-0.83293	3.85945e-17	-1.06862	1.7104e-29
AT5G10470	KAC1	kinesin like protein for actin based chloroplast movement 1	Kinesin that binds cyclin-dependent kinase CDKA;1 as homodimer or as heterodimer with KCA2. Demarcates the division site in plant cells.	0	0	-1.0734	4.05643e-18
AT4G14320	API2, RPL36aB			0	0	-1.07369	1.20176e-19
AT3G60245	AT3G60245			0	0	-1.0744	1.14265e-24
AT3G07110	AT3G07110			0	0	-1.07549	9.74005e-17
AT3G01480	CYP38	cyclophilin 38	Encodes a chloroplast cyclophilin functioning in the assembly and maintenance of photosystem II (PSII) supercomplexes. The mRNA is cell-to-cell mobile.	0	0	-1.07633	1.09439e-20
AT2G26910	ABCG32	ATP-binding cassette G32	Encodes a member of the PLEIOTROPIC DRUG RESISTANCE family of ATP binding cassette transporters. Required for the formation of a functional cuticle.	-0.349777	0.00915631	-1.0787	9.02106e-21
AT4G15545	NAIP1		NAI1 interacting protein, involved in ER body formation.	-0.476752	6.24259e-06	-1.07904	3.08387e-20
AT4G12470	AZI1	azelaic acid induced 1	Encodes AZI1 (AZELAIC ACID INDUCED 1). Involved in the priming of salicylic acid induction and systemic immunity triggered by pathogen or azelaic acid. Targeting if AZI1 to chloroplasts is increased during SAR induction and that localization requires the PRR domain.It is involved in the uptake and movement of the azelaic acid signal.	-1.03608	6.61644e-15	-1.07929	3.9438e-14
AT4G34830	MRL1	MATURATION OF RBCL 1	Encodes MRL1, a conserved pentatricopeptide repeat protein, required for stabilization of rbcL mRNA.	0	0	-1.07948	8.62703e-16
AT4G00710	BSK3	brassinosteroid-signaling kinase 3	Encodes BR-signaling kinase 3 (BSK3), one of the three homologous BR-signaling kinases (BSK1, AT4G35230; BSK2, AT5G46570; BSK3, AT4G00710). Mediates signal transduction from receptor kinase BRI1 by functioning as the substrate of BRI1. Plasma membrane localized.	-0.662435	1.40244e-10	-1.08121	3.10125e-17
AT3G26570	PHT2;1	phosphate transporter 2;1	low affinity phosphate transporter	-0.292182	0.0107975	-1.08155	5.18969e-15
AT1G73655	AT1G73655			0	0	-1.08219	3.25242e-26
AT1G35720	ANNAT1	annexin 1	Encodes a member of the annexin gene family, a diverse, multigene family of calcium-dependent, membrane-binding proteins. The protein was determined to have peroxidase activity. This activity is thought to be dependent on the presence of post-translational modifications (most likely phosphorylation). The protein was shown to be present as a mixture of monomer and homodimer. The homodimerization s…	0	0	-1.08399	8.32329e-15
AT2G01250	RPL7B		Cytosolic ribosomal 60S subunit protein.	0	0	-1.0855	2.3776e-22
AT3G11700	FLA18	FASCICLIN-like arabinogalactan protein 18 precursor	Fasciclin-like arabinogalactan protein. Possibly involved in embryogenesis and seed development.	-1.19105	3.27742e-21	-1.08956	5.98997e-21
AT1G61520	LHCA3	photosystem I light harvesting complex gene 3	PSI type III chlorophyll a/b-binding protein (Lhca3*1) The mRNA is cell-to-cell mobile.	0	0	-1.08995	5.04092e-11
AT1G15690	AVP1		Encodes a H(+)-translocating (pyrophosphate-energized) inorganic pyrophosphatase (H(+)-PPase; EC 3.6.1.1) located in the vacuolar membrane. Expression is found in all tissues examined, including meristems and floral organ primordium. Expression is particularly enhanced in pollen, and is repressed by light. Over expression and loss of function phenotypes suggest AVP1 is involved in regulation of a…	-0.636972	4.61069e-08	-1.09093	6.68945e-19
AT4G25080	CHLM	magnesium-protoporphyrin IX methyltransferase	Encodes a protein with methyltransferase activity responsible for the methylation of magnesium protoporphyrin IX. Mutants defective in this gene are affected in chlorophyll biosynthesis and show a reduction in the accumulation of a number of major thylakoid-associated proteins including components of PSI (LHCI), PSII (LHCII, D1, CP43) and the cytochrome b6f complex (Cytf). By contrast, no signifi…	0	0	-1.09114	2.92923e-16
AT2G42220	AT2G42220			0	0	-1.09319	2.03452e-13
AT1G69530	EXPA1	expansin A1	Member of Alpha-Expansin Gene Family. Naming convention from the Expansin Working Group (Kende et al, Plant Mol Bio). Involved in the formation of nematode-induced syncytia in roots of Arabidopsis thaliana.	-0.749343	1.27688e-10	-1.09395	6.21498e-21
AT5G63310	NDPK2	nucleoside diphosphate kinase 2	Maintains intracellular dNTP levels except ATP. Plays a role in response to oxidative stress and UV. Involved in phytochrome-mediated light signaling. Participates in auxin-regulated processes, partly through the modulation of auxin transport. H-bonding with His-197 inside the nucleotide-binding pocket is critical for NDPK2 functioning.	0	0	-1.09513	6.65601e-24
AT5G43700	ATAUX2-11	AUXIN INDUCIBLE 2-11	Auxin inducible protein similar to transcription factors.	-0.739881	1.62052e-10	-1.09515	4.08019e-17
AT5G54270	LHCB3	light-harvesting chlorophyll B-binding protein 3	Lhcb3 protein is a component of the main light harvesting chlorophyll a/b-protein complex of Photosystem II (LHC II).	0	0	-1.09517	1.42723e-07
AT5G09220	AAP2	amino acid permease 2	member of AAAP family The mRNA is cell-to-cell mobile.	0	0	-1.0956	7.80527e-18
AT1G57660	AT1G57660			0	0	-1.09597	2.96816e-26
AT1G41880	AT1G41880			0	0	-1.09621	6.71647e-19
AT2G30600	AT2G30600			-1.6849	6.94606e-54	-1.0996	9.55641e-17
AT2G26250	KCS10	3-ketoacyl-CoA synthase 10	epidermis-specific, encodes KCS10, a putative 3-ketoacyl-CoA synthase. probably involved in the synthesis of long-chain lipids found in the cuticle.	-0.703147	1.30207e-05	-1.09969	1.32103e-26
AT1G34000	OHP2	one-helix protein 2	Encodes a novel member of the Lhc family from Arabidopsis with one predicted transmembrane alpha-helix closely related to helix I of Lhc protein from PSI (Lhca4). Gene expression is triggered by light stress and both transcript and protein accumulate in a light intensity-dependent manner. Ohp2 is associated with PSI under low- or high-light conditions. Together with OHP1, OHP2 is essential for th…	-0.336711	0.00989407	-1.10118	5.70139e-23
AT3G63140	CSP41A	chloroplast stem-loop binding protein of 41 kDa	Encodes a protein with ribonuclease activity that is involved in plastid rRNA maturation.	0	0	-1.10213	1.29868e-12
AT5G16130	AT5G16130			0	0	-1.10276	1.96934e-24
AT1G05850	POM1	POM-POM1	Encodes an endo chitinase-like protein AtCTL1. Essential for tolerance to heat, salt and drought stresses. Also involved in root hair development, cell expansion and response to cytokinin. Allelic to erh2. 11 alleles described in Hauser (1995). Mutant is defective in acquired thermotolerance, appears semidwarf throughout its life cycle and has extra lateral branches. There are two EMS alleles. Ex…	-0.649254	2.51843e-08	-1.10368	1.12657e-20
AT1G76990	ACR3	ACT domain repeat 3		-0.71849	3.53079e-13	-1.10383	5.61211e-28
AT5G02160	FIP		Zinc-finger domain containing protein involved in abiotic stress response. Possesses an N-terminal transit peptide followed by a hydrophobic domain and a zinc-finger domain. Despite the presence of a zinc-finger domain (C4-type) with two CXXCXGXG conserved repeats, characteristic of DNAJ protein, the conserved J domain is absent in FIP. Interacts with FtsH5. Gene expression levels are reduced and…	0	0	-1.10422	9.23621e-13
AT1G64370	PARCL			-0.339884	0.00361911	-1.1044	2.45659e-28
AT4G04340	osca1, OSCA1.1		Encodes a plasma membrane localized hyperosmolality gated calcium channel that is expressed in guard cells and roots.	0	0	-1.10489	2.48758e-18
AT3G53460	CP29	chloroplast RNA-binding protein 29	Encodes a nuclear gene with a consensus RNA-binding domain that is localized to the chloroplast.	0	0	-1.1053	6.55898e-15
AT2G19800	MIOX2	myo-inositol oxygenase 2	Encodes a myo-inositol oxygenase family gene.	-2.86627	8.0648e-118	-1.10936	2.99319e-28
AT5G22640	emb1211	embryo defective 1211	EMB1211 is a MORN (multiple membrane occupation and recognition nexus) motif containing protein involved in embryo development and chloroplast biogenesis. The mRNA is cell-to-cell mobile.	0	0	-1.1097	3.29731e-21
AT2G06520	PSBX	photosystem II subunit X	Encodes a protein with sequence similarity to the spinach photosystem II subunit PsbX.	0	0	-1.1121	1.51058e-12
AT5G51110	ATP1, RAF2, SDIRIP1		Encodes a protein involved in Rubisco assembly that also mediates Abscisic acid-dependent stress response. It is a ubiquitination target of the intracellular E3 ligase SDIR1. It selectively regulates the expression of the downstream basic region/leucine zipper motif transcription factor gene ABA-INSENSITIVE5, rather than ABA-RESPONSIVE ELEMENTS BINDING FACTOR3 (ABF3) or ABF4, to regulate ABA-medi…	0	0	-1.11222	2.19673e-22
AT1G04820	TUA4	tubulin alpha-4 chain	Encodes an alpha tubulin isoform that is expressed in roots, leaves and flowers.	-0.255267	0.023328	-1.11298	5.05505e-24
AT1G70600	AT1G70600			0	0	-1.11354	5.04473e-29
AT3G45780	PHOT1	phototropin 1	Blue-light photoreceptor. Contains a light activated serine-threonine kinase domain and LOV1 and LOV2 repeats. Mutants are defective in blue-light response. Mediates blue light-induced growth enhancements. PHOT1 and PHOT2 mediate blue light-dependent activation of the plasma membrane H+-ATPase in guard cell protoplasts. PHOT1 undergoes blue-light-dependent autophosphorylation. At least eight phos…	-0.305009	0.0252071	-1.11397	3.84753e-24
AT2G24090	PRPL35	plastid ribosomal protein L35		0.303297	0.00758422	-1.11477	2.11113e-16
AT4G01310	PRPL5			0.347406	0.00976151	-1.11512	4.51493e-17
AT1G68590	PSRP3/1	plastid-speci&#64257;c ribosomal protein 3/1		0	0	-1.11556	1.06098e-26
AT1G28580	AT1G28580		GDSL-motif esterase/acyltransferase/lipase. Enzyme group with broad substrate specificity that may catalyze acyltransfer or hydrolase reactions with lipid and non-lipid substrates.	-0.487917	2.84299e-05	-1.11941	1.60441e-29
AT2G42840	PDF1	protodermal factor 1	Encodes a putative extracellular proline-rich protein is exclusively expressed in the L1 layer of vegetative, inflorescence and floral meristems and the protoderm of organ primordia.	0	0	-1.12067	1.20448e-12
AT4G19210	ABCE2	ATP-binding cassette E2	member of RLI subfamily The mRNA is cell-to-cell mobile.	-0.253633	0.0197925	-1.12397	1.46939e-32
AT1G71500	LIL8, PSB33		Encodes PSB33, a protein conserved in the plastid lineage. PSB33 is associated with the chloroplast thylakoid membrane and provides stability to Photosystem II. The mRNA is cell-to-cell mobile.	0.218533	0.0487571	-1.12605	1.65536e-23
AT5G35970	AT5G35970			0	0	-1.12651	7.16306e-13
AT4G14960	TUA6	Tubulin alpha-6	Encodes an alpha-tubulin isoform required for right handed helical growth.	-0.244011	0.0343702	-1.12686	1.82559e-23
AT5G12150	PHGAP1		Encodes a protein with similarity to REN1, a Rho GTPase activating protein.It is cytoplasmic and plasma membrane associated in interphase, but during mitosis localizes to the CDZ/CDS in a POK-dependent manner.	0	0	-1.12798	5.02298e-28
AT3G23700	SRRP1		Encodes a chloroplast-localized S1 domain-containing protein with RNA chaperone activity that affects the splicing and processing of chloroplast transcripts and plays a role in seedling growth in the presence of ABA. Binds the chloroplast psbA RNA and some other chloroplast RNAs. Required for the stability of the chloroplast ndhC RNA. Inhibits ribosome association with psbA RNA and ycf1 RNA. Not …	0	0	-1.12883	6.55415e-21
AT3G46780	PTAC16	plastid transcriptionally active 16		0	0	-1.12929	1.31773e-12
AT4G18480	CHLI1		Encodes the CHLI subunit of magnesium chelatase which is required for chlorophyll biosynthesis. All four cysteine residues of the protein form two disulfide bonds (Cys102-Cys193 and Cys354-Cys396) under oxidized conditions but are fully reduced by reduction. It was suggested that the redox state of CHLI is regulated in vivo by the change of the redox environment in the chloroplasts probably via t…	0	0	-1.13048	2.37593e-24
AT3G05560	AT3G05560			0	0	-1.13076	4.29023e-28
AT4G38680	GRP2	glycine rich protein 2	Encodes a glycine-rich protein that binds nucleic acids and promotes DNA melting. Its transcript and protein levels are up-regulated in response to cold treatment with protein levels peaking earlier in shoots (~10-14 days) than in roots (~21 days). It is normally expressed in meristematic regions and developing tissues where cell division occurs. RNAi and antisense lines with lower levels of CSP2…	0	0	-1.13199	2.68188e-16
AT1G16080	AT1G16080			0	0	-1.1321	2.10037e-16
AT4G32410	CESA1	cellulose synthase 1	Encodes a cellulose synthase isomer. CESA1 mutants have cellulose defect in the primary cell wall. Multiple lines of evidence suggest that CESA1, along with CESA3 and CESA6 are present in the same plasma membrane complex for cellulose biosynthesis. lasma membrane complex for cellulose biosynthesis. As inferred from the null role of secondary wall-type CesAs, included in a set of five primary wall…	-0.852505	4.20897e-10	-1.13238	5.73394e-24
AT4G34620	SSR16	small subunit ribosomal protein 16	Encodes ribosomal protein S16, has embryo-defective lethal mutant phenotype	0	0	-1.13241	2.01411e-18
AT3G55750	AT3G55750			0	0	-1.13303	2.22449e-19
AT3G16460	JAL34	jacalin-related lectin 34	Mannose-binding protein	-0.501292	0.000103575	-1.13333	5.32169e-17
AT3G63410	APG1	ALBINO OR PALE GREEN MUTANT 1	Encodes a MPBQ/MSBQ methyltransferase located in the chloroplast inner envelope membrane. Mutant plants lack plastoquinone (PQ), suggesting that the APG1 protein is involved in the methylation step of PQ biosynthesis. The gene product is also involved in tocopherol (vitamin E) biosynthesis.	0	0	-1.13354	2.97971e-20
AT3G62530	AT3G62530			0	0	-1.1337	1.13731e-23
AT4G10480	AT4G10480			-0.258867	0.0348337	-1.13401	2.25411e-22
AT5G17230	PSY	PHYTOENE SYNTHASE	Encodes phytoene synthase that is the rate-limiting enzyme in the carotenoid biosynthetic pathway and that interacts with the ORANGE (OR) protein. PSY's expression is posttransciptionally regulated by OR.	-0.36364	0.00151526	-1.13561	9.83623e-26
AT3G52380	CP33	chloroplast RNA-binding protein 33	Encodes a chloroplast RNA-binding protein that stabilizes chloroplast RNAs as evidenced by analyses of transcript accumulation in null mutants. Essential for seedling development (albino, strongly retarded growth even on sucrose-containing medium).	0	0	-1.13675	1.2807e-22
AT5G64100	PRX69		Class III peroxidase cell wall-targeted protein localized to the micropylar endosperm facing the radicle. Involved in seed germination.	-2.19043	1.61879e-36	-1.13822	3.34336e-16
AT2G36620	RPL24A	ribosomal protein L24	RPL24A encodes ribosomal protein L24, homolog of cytosolic RPL24, found in archaea and higher eukaryotes. Arabidopsis has two RPL24 homologs, RPL24A (AT2G36620) and RPL24B (AT3G53020).	0	0	-1.13871	1.79013e-18
AT1G32080	LrgB		Encodes a plant LrgAB/CidAB protein localized to the chloroplast envelope that is involved in chloroplast development, carbon partitioning, ABA/drought response, and leaf senescence. The gene may have evolved from gene fusion of bacterial lrgA and lrgB.	0	0	-1.13905	8.80148e-14
AT4G34190	SEP1	stress enhanced protein 1	Encodes a stress enhanced protein that localizes to the thylakoid membrane and whose mRNA is upregulated in response to high light intensity. It may be involved in chlorophyll binding.	0	0	-1.13941	2.84071e-22
AT5G08650	cpLEPA		Critical for chloroplast protein synthesis under suboptimal conditions. Essential translation factor that promotes the efficiency of chloroplast protein synthesis.	0	0	-1.14197	7.15881e-26
AT1G71695	AT1G71695			0	0	-1.14263	2.06369e-32
AT5G59850	AT5G59850			0	0	-1.14405	2.60835e-17
AT2G04030	CR88		Encodes a chloroplast-targeted 90-kDa heat shock protein located in the stroma involved in red-light mediated deetiolation response and crucial for protein import into the chloroplast stroma. Mutants are resistant to chlorate, have elongated hypocotyls in light, and affect the expression of NR2, CAB, and RBCS but NOT NR1 and NiR.	0.438251	0.00026774	-1.14521	6.07349e-28
AT1G15290	REC3		Encodes REDUCED CHLOROPLAST COVERAGE 3 (REC3). Contributes to establishing the size of the chloroplast compartment.	0	0	-1.14573	1.031e-17
AT1G35680	RPL21C	chloroplast ribosomal protein L21	Encodes a chloroplast ribosomal protein L21 that is required for chloroplast development and embryogenesis. The mRNA is cell-to-cell mobile.	0	0	-1.14606	4.27247e-24
AT5G55220	TIG1			0	0	-1.14643	1.34831e-26
AT5G14920	GASA14		Encodes a GASA domain containing protein that regulates increases in plant growth through GA-induced and DELLA-dependent signal transduction and that can increase abiotic stress resistance by reducing ROS accumulation.	-1.09001	1.15169e-12	-1.14771	1.206e-12
AT5G20280	SPS1F	sucrose phosphate synthase 1F	Encodes a protein with putative sucrose-phosphate synthase activity. When the gene was expressed in transgenic tobacco plants, a clear trend for increased SPS activity was noted.	0	0	-1.15474	1.7164e-30
AT1G58270	ZW9		ZW9 mRNA, complete cds The mRNA is cell-to-cell mobile.	0	0	-1.15573	7.87883e-20
AT3G59780	AT3G59780			0	0	-1.15695	7.97103e-24
AT4G01800	AGY1	Albino or Glassy Yellow 1	Encodes the ATPase subunit of the chloroplast Sec translocation machinery which plays an essential role in chloroplast biogenesis and the regulation of photosynthesis, the absence of which triggers a retrograde signal, eventually leading to a reprogramming of chloroplast and mitochondrial gene expression.	0	0	-1.15866	6.5117e-20
AT1G03680	THM1	thioredoxin M-type 1	Encodes a m-type thioredoxin (Trx-m1) localized in chloroplast stroma.	0	0	-1.15914	1.23666e-20
AT3G52150	PSRP2	plastid-speci&#64257;c ribosomal protein 2		0.231439	0.0385195	-1.15952	4.5352e-24
AT4G03280	PETC	photosynthetic electron transfer C	Encodes the Rieske FeS center of cytochrome b6f complex. Gene is expressed in shoot but not in root. Mutant has reduced electron transport at saturating light intensities and Q-cycle activity is hypersensitive to acidification of the thylakoid lumen. The mRNA is cell-to-cell mobile.	0	0	-1.1598	3.05534e-16
AT5G21930	PAA2	P-type ATPase of Arabidopsis 2	P-Type ATPase, mediates copper transport to chloroplast thylakoid lumen. Required for accumulation of copper-containing plastocyanin in the thylakoid lumen and for effective photosynthetic electron transport	0	0	-1.16142	2.28983e-16
AT2G24280	AT2G24280			0	0	-1.16149	7.01163e-20
AT2G21970	SEP2	stress enhanced protein 2	stress enhanced protein 2 (SEP2) chlorophyll a/b-binding protein	0	0	-1.16261	1.18795e-17
AT3G20820	AT3G20820			0	0	-1.16475	1.91541e-20
AT3G47650	BSD2			0	0	-1.1657	6.39475e-14
AT3G27240	Cyc1-1			0	0	-1.16574	7.03941e-22
AT3G13120	PRPS10			0	0	-1.16613	3.60302e-22
AT5G61170	AT5G61170			0	0	-1.16714	1.74988e-20
AT1G68560	XYL1	alpha-xylosidase 1	Encodes a bifunctional alpha-l-arabinofuranosidase/beta-d-xylosidase that belongs to family 3 of glycoside hydrolases.	-0.411627	0.000816953	-1.16937	1.69e-29
AT1G51500	ABCG12	ATP-binding cassette G12	Encodes an ABC transporter involved in cuticular wax biosynthesis. Lines carrying recessive mutations in this locus have weakly glaucous stem surface, and relative elevated secondary alcohols and ketones.	-0.633751	1.08759e-05	-1.16942	1.00259e-18
AT5G21105	AT5G21105			-0.605191	7.89733e-06	-1.17113	1.91619e-22
AT1G20020	FNR2	ferredoxin-NADP( )-oxidoreductase 2	Encodes a leaf-type ferredoxin:NADP(H) oxidoreductase. It is present in both chloroplast stroma and thylakoid membranes but is more abundant in the stroma The mRNA is cell-to-cell mobile.	0	0	-1.17203	2.26458e-21
AT1G07320	RPL4	ribosomal protein L4	encodes a plastid ribosomal protein L4	0	0	-1.17215	4.58238e-21
AT5G19770	TUA3	tubulin alpha-3	tubulin 3	-0.854288	1.36365e-10	-1.17784	1.62419e-28
AT4G29060	emb2726	embryo defective 2726		0.267401	0.0357443	-1.17971	1.89657e-19
AT1G79850	RPS17	ribosomal protein S17	nuclear-encoded 30S chloroplast ribosomal protein S17	0	0	-1.18128	9.39148e-23
AT4G35100	PIP3	plasma membrane intrinsic protein 3	a member of the plasma membrane intrinsic protein PIP. functions as aquaporin. Salt-stress-inducible MIP	-0.313029	0.00389569	-1.18422	9.09551e-19
AT2G27710	AT2G27710			0	0	-1.18434	1.25316e-28
AT4G28080	REC2		Encodes REDUCED CHLOROPLAST COVERAGE 2 (REC2). Along with REC1 and REC3 it contributes to establishing the size of the chloroplast compartment.	0	0	-1.18522	1.88904e-14
AT4G25740	AT4G25740			0	0	-1.18629	1.20732e-22
AT1G55480	ZKT	protein containing PDZ domain, a K-box domain, and a TPR region	Encodes a member of a novel plant protein family containing a PDZ, a K-box, and a TPR motif. mRNA but not protein levels decrease after wounding. ZKT is phosphorylated at Thr and Ser residues after wounding. The mRNA is cell-to-cell mobile.	0	0	-1.18666	1.06949e-24
AT3G63540	AT3G63540		Conceptual translation of this open reading frame gave the sequence of a 229-residue hypothetical protein that contains the same sequence as the mature A. thaliana chloroplast luminal 19-kDa protein linked to a putative signal sequence.	0	0	-1.1867	9.60377e-24
AT1G75680	GH9B7	glycosyl hydrolase 9B7		-0.488291	0.000162186	-1.18677	2.3106e-23
AT5G47700	RPP1.3, RPP1C		Co-orthologous gene of large ribosomal subunit protein RPP1.	0	0	-1.18699	1.63885e-28
AT3G14240	AT3G14240			-0.574599	9.74118e-09	-1.18752	1.35351e-16
AT1G55490	CPN60B	chaperonin 60 beta	encodes the beta subunit of the chloroplast chaperonin 60, a homologue of bacterial GroEL. Mutants in this gene develops lesions on its leaves, expresses systemic acquired resistance (SAR) and develops accelerated cell death to heat shock stress. The protein has molecular chaperone activity for suppressing protein aggregation in vitro.	0.360086	0.00596824	-1.19443	4.35764e-20
AT3G59400	GUN4	GENOMES UNCOUPLED 4	GUN, genomes uncoupled, is necessary for coupling the expression of some nuclear genes to the functional state of the chloroplast. Binds to the magnesium chelatase complex and promotes formation of the substrate,a tetrapyrrole signaling molecule. Porphyrin-binding protein that enhances the activity of Mg-chelatase. Although required for chlorophyll accumulation under normal growth conditions, GUN…	-0.343073	0.00202542	-1.19575	3.66036e-13
AT4G36250	ALDH3F1	aldehyde dehydrogenase 3F1	Encodes a putative aldehyde dehydrogenase. The gene is not responsive to osmotic stress and is expressed constitutively at a low level in plantlets and root cultures.	-0.338211	0.00909406	-1.19621	5.93076e-24
AT1G27400	AT1G27400			0	0	-1.19799	4.53463e-21
AT5G38410	RBCS3B	Rubisco small subunit 3B	Encodes a member of the Rubisco small subunit (RBCS) multigene family: RBCS1A (At1g67090), RBCS1B (At5g38430), RBCS2B (At5g38420), and RBCS3B (At5g38410). Functions to yield sufficient Rubisco content for leaf photosynthetic capacity.	0	0	-1.20159	4.70655e-13
AT5G40850	UPM1	urophorphyrin methylase 1	Encodes a urophorphyrin III methylase that catalyzes S-adenosyl-L-methionine-dependent transmethylation in a multistep process involving the formation of a covalently linked complex with S-adenosyl-L-methionine. The mRNA is cell-to-cell mobile.	-0.545697	3.21817e-05	-1.20302	9.91763e-24
AT3G26520	TIP2	tonoplast intrinsic protein 2	gamma tonoplast intrinsic protein 2 (TIP2). expressed throughout the plant and transcript level is increased upon NaCl or ABA treatments. NaCl stress-sensitive yeast mutant strains exhibit more resistance to salt when expressing this protein.	-0.667834	7.18005e-09	-1.20502	4.74613e-18
AT4G13930	SHM4	serine hydroxymethyltransferase 4	Encodes a serine hydroxymethyltransferase maximally expressed in root	-0.269502	0.0295265	-1.20527	1.58589e-27
AT3G07460	AT3G07460			0	0	-1.20649	1.36229e-17
AT3G04790	EMB3119	EMBRYO DEFECTIVE 3119		0	0	-1.2079	3.22482e-31
AT2G33770	PHO2	phosphate 2	Encodes a ubiquitin-conjugating E2 enzyme. UBC24 mRNA accumulation is suppressed by miR399f, miR399b and miR399c. Involved in phosphate starvation response and mediates degradation of PHO1 and PHT1s at endomembrane. Its expression is responsive to phosphate (Pi) and not phosphite (Phi) in roots and shoots. The mRNA is cell-to-cell mobile.	0	0	-1.20879	6.18406e-25
AT1G63000	NRS/ER	nucleotide-rhamnose synthase/epimerase-reductase		0	0	-1.20949	1.6266e-19
AT5G65310	HB5	homeobox protein 5	Encodes a class I HDZip (homeodomain-leucine zipper) protein that is a positive regulator of ABA-responsiveness, mediating the inhibitory effect of ABA on growth during seedling establishment.	0	0	-1.20996	6.34568e-30
AT1G32470	AT1G32470			0	0	-1.21081	2.04587e-21
AT3G16240	DELTA-TIP	delta tonoplast integral protein	Delta tonoplast intrinsic protein, functions as a water channel and ammonium (NH3) transporter. Highly expressed in flower, shoot, and stem. Expression shows diurnal regulation and is induced by ammonium (NH3). Protein localized to vacuolar membrane. The mRNA is cell-to-cell mobile.	-1.41115	1.05943e-18	-1.21232	4.79727e-13
AT5G17870	PSRP6	plastid-specific 50S ribosomal protein 6	plastid-specific ribosomal protein 6 precursor (Psrp-6) - like	0.236377	0.0496392	-1.21336	3.20978e-22
AT2G23670	YCF37	homolog of Synechocystis YCF37		-0.279777	0.0306655	-1.21356	1.62699e-22
AT1G08540	SIG2	RNApolymerase sigma subunit 2	Enodes a subunit of chloroplast RNA polymerase, confers the ability to recognize promoter sequences on the core enzyme. SIG1 is induced by red and blue light.	0	0	-1.21579	4.17422e-20
AT4G20360	RABE1b	RAB GTPase homolog E1B	Nuclear transcribed, plastid localized EF-Tu translation elongation factor. Referred to as AtRabE1b in DOI:10.1104/pp.013052. However, wider community usage and more publications assign the symbol RabE1b to At5g59840.	0	0	-1.21859	3.78884e-19
AT4G02770	PSAD-1	photosystem I subunit D-1	Encodes a protein predicted by sequence similarity with spinach PsaD to be photosystem I reaction center subunit II (PsaD1)	0	0	-1.22281	1.48634e-16
AT3G25690	CHUP1	CHLOROPLAST UNUSUAL POSITIONING 1	actin binding protein required for normal chloroplast positioning The mRNA is cell-to-cell mobile.	-0.424378	5.31104e-05	-1.22296	4.41176e-29
AT1G20340	DRT112	DNA-DAMAGE-REPAIR/TOLERATION PROTEIN 112	recombination and DNA-damage resistance protein (DRT112) One of two Arabidopsis plastocyanin genes. Predominant form, expressed 10x higher than PETE1. PETE2 is thought to be post-transcriptionally regulated via copper accumulation and is involved in copper homeostasis. Mutation of this gene does not have obvious effect on photosynthesis. In plsp1-1 mutant plastids, the nonmature form of the prote…	0	0	-1.22319	2.50393e-19
AT1G56110	NOP56	homolog of nucleolar protein NOP56	NOP56-like protein	0	0	-1.22338	3.16534e-14
AT1G12090	ELP	extensin-like protein	extensin-like protein (ELP)	-0.840381	2.78576e-14	-1.22539	1.93728e-16
AT1G30380	PSAK	photosystem I subunit K	Encodes subunit K of photosystem I reaction center. The mRNA is cell-to-cell mobile.	0	0	-1.22615	2.27653e-12
AT3G14650	CYP72A11	cytochrome P450, family 72, subfamily A, polypeptide 11	putative cytochrome P450 The mRNA is cell-to-cell mobile.	0	0	-1.22652	1.51075e-24
AT4G39330	CAD9	cinnamyl alcohol dehydrogenase 9		0	0	-1.2269	8.42414e-18
AT1G27020	AT1G27020			0	0	-1.22773	6.85268e-23
AT1G54010	GLL23		GDSL-motif esterase/acyltransferase/lipase. Enzyme group with broad substrate specificity that may catalyze acyltransfer or hydrolase reactions with lipid and non-lipid substrates.	0.91224	3.68219e-20	-1.23072	9.26905e-29
AT4G35250	HCF244	high chlorophyll fluorescence phenotype 244	HCF244 is a member of the atypical short-chain dehydrogenase/reductase superfamily, a modified group, which has lost enzyme activity.HCF244 interacts with unknown partners in a 200-400 kD membrane associated complex.	0	0	-1.23136	3.705e-15
AT1G20010	TUB5	tubulin beta-5 chain	beta tubulin	-0.378329	0.00796076	-1.23154	2.64197e-29
AT5G55930	OPT1	oligopeptide transporter 1	oligopeptide transporter	-1.0391	1.57568e-20	-1.23257	8.49737e-20
AT1G54780	TLP18.3	thylakoid lumen protein 18.3	Encodes a thylakoid lumen protein regulating photosystem II repair cycle. Has acid phosphatase activity. The mRNA is cell-to-cell mobile.	0	0	-1.23602	1.2807e-22
AT1G22530	PATL2	PATELLIN 2	PATLs belong to a family of proteins having a Golgi dynamics (GOLD) domain in tandem with the Sec14p-like domain. PATLs are auxin regulated. Quadruple mutants (patl2456) show altered PIN1 lateralization in root endodermis cells.	-1.18763	8.81987e-14	-1.24286	1.74541e-30
AT5G23240	AtDjC17, DJC76			0	0	-1.24502	1.15421e-22
AT3G54400	AT3G54400			-1.20436	1.80788e-18	-1.24717	1.03441e-24
AT1G70760	NdhL	NADH dehydrogenase-like complex L	a subunit of the chloroplast NAD(P)H dehydrogenase complex, involved in PSI cyclic electron transport. Located on the thylakoid membrane. Mutant has impaired NAD(P)H dehydrogenase activity. The mRNA is cell-to-cell mobile.	0.30574	0.0153837	-1.24907	4.25639e-19
AT4G17390	AT4G17390			0	0	-1.25027	4.45971e-38
AT4G04640	ATPC1		One of two genes (with ATPC2) encoding the gamma subunit of Arabidopsis chloroplast ATP synthase.	0	0	-1.25183	4.54621e-20
AT5G60920	COB	COBRA	Encodes a glycosylphosphatidylinositol-anchored protein localized primarily in the plasma membrane of the longitudinal sides of root cells. Necessary for oriented cell expansion in Arabidopsis. Cob mutants have abnormal roots that expand radially rather than longitudinally under certain growth conditions.	-0.861451	4.84672e-17	-1.25306	1.80621e-33
AT4G18030	AT4G18030			-0.638002	4.40829e-06	-1.2547	1.12097e-33
AT5G57930	APO2	ACCUMULATION OF PHOTOSYSTEM ONE 2	ACCUMULATION OF PHOTOSYSTEM ONE 2	0	0	-1.25775	4.39177e-25
AT2G28000	CPN60A	chaperonin-60alpha	Encodes chaperonin-60 alpha, a molecular chaperone involved in Rubisco folding. Mutants display aberrant chloroplast and embryo development. The mRNA is cell-to-cell mobile.	0.443755	0.00213677	-1.25793	2.6361e-32
AT5G13510	EMB3136	EMBRYO DEFECTIVE 3136		0	0	-1.26547	5.08049e-23
AT2G38120	AUX1	AUXIN RESISTANT 1	Encodes an auxin influx transporter. AUX1 resides at the apical plasma membrane of protophloem cells and at highly dynamic subpopulations of Golgi apparatus and endosomes in all cell types. AUX1 action in the lateral root cap and/or epidermal cells influences lateral root initiation and positioning. Shoot supplied ammonium targets AUX1 and inhibits lateral root emergence. The mRNA is cell-to-cell…	0	0	-1.26884	2.83952e-21
AT3G27850	RPL12-C	ribosomal protein L12-C	50S ribosomal protein L12-C The mRNA is cell-to-cell mobile.	0	0	-1.27395	1.89057e-20
AT4G17090	CT-BMY	chloroplast beta-amylase	Encodes a beta-amylase targeted to the chloroplast. Transgenic BMY8 RNAi lines fail to accumulate maltose during cold shock suggesting that maltose accumulation coincides with BMY8 expression. Apart from maltose, the sugar content of the RNAi lines were similar to wildtype (glucose and sucrose unaffected).BAM3 activity declines 2 and 4 days after start of cold stress despite an increase in transc…	-0.655651	0.000463986	-1.2796	9.07178e-31
AT3G21055	PSBTN	photosystem II subunit T	Encodes photosystem II 5 kD protein subunit PSII-T. This is a nuclear-encoded gene (PsbTn) which also has a plastid-encoded paralog (PsbTc).	0	0	-1.28498	2.9438e-16
AT5G53490	TL17		thylakoid lumenal 17.4 kDa protein, chloroplast, identical to SP:P81760 Thylakoid lumenal 17.4 kDa protein, chloroplast precursor (P17.4) {Arabidopsis thaliana}. Putative pentapeptide protein.	-0.369273	0.00221154	-1.28545	6.47025e-24
AT5G47190	PRPL19			0	0	-1.28567	9.3471e-24
AT4G17600	LIL3:1		Encodes Lil3:1 (light-harvesting-like) protein. Belongs to the Lhc super-gene family encodes the light-harvesting chlorophyll a/b-binding (LHC) proteins that constitute the antenna system of the photosynthetic apparatus. A generic LHC motif is present in Lil3:1. The mRNA is cell-to-cell mobile.	0.243186	0.0391196	-1.28812	1.45745e-28
AT1G50010	TUA2	tubulin alpha-2 chain	Encodes alpha-2,4 tubulin. TUA2 and TUA4 encode identical proteins. The mRNA is cell-to-cell mobile.	-0.258397	0.0323178	-1.28924	1.03892e-37
AT4G21280	PSBQA	photosystem II subunit QA	Encodes the PsbQ subunit of the oxygen evolving complex of photosystem II.	0	0	-1.29031	2.43519e-17
AT1G65840	PAO4	polyamine oxidase 4	encodes a peroxisomal polyamine oxidase, involved in the back-conversion polyamine degradation pathway. Among the five polyamine oxidases in the Arabidopsis genome, PAO4 is the major isoform in root peroxisomes. The mRNA is cell-to-cell mobile.	-0.78271	1.12568e-13	-1.2918	2.86338e-22
AT1G04430	AT1G04430			-0.909045	4.55079e-13	-1.29316	1.13659e-40
AT5G23060	CaS	calcium sensing receptor	Encodes a chloroplast-localized protein that modulates cytoplasmic Ca2+ concentration and is crucial for proper stomatal regulation in response to elevations of external Ca2+. Phosphorylation of this protein is dependent on calcium.	0	0	-1.29353	3.41235e-15
AT5G45410	AtNHR2A		Plastid localized protein of unknown function. Mutants are more susceptible to P. syringae and produce less callose upon infection.	0	0	-1.29504	3.2525e-22
AT1G70940	PIN3	PIN-FORMED 3	A regulator of auxin efflux and involved in differential growth. PIN3 is expressed in gravity-sensing tissues, with PIN3 protein accumulating predominantly at the lateral cell surface. PIN3 localizes to the plasma membrane and to vesicles. In roots, PIN3 is expressed without pronounced polarity in tiers two and three of the columella cells, at the basal side of vascular cells, and to the lateral …	-0.545551	3.49824e-06	-1.29956	1.70545e-32
AT2G37220	AT2G37220		Encodes a chloroplast RNA binding protein. A substrate of the type III effector HopU1 (mono-ADP-ribosyltransferase). Protein is tyrosine-phosphorylated and its phosphorylation state is modulated in response to ABA in Arabidopsis thaliana seeds.	0	0	-1.30092	1.72231e-21
AT1G13930	AT1G13930		Involved in response to salt stress. Knockout mutants are hypersensitive to salt stress. The mRNA is cell-to-cell mobile.	0	0	-1.3014	6.51149e-19
AT2G44670	AT2G44670			-0.877535	3.3367e-13	-1.30169	7.27966e-30
AT5G28500	AT5G28500			0	0	-1.30391	5.45718e-22
AT2G13360	AGT	alanine:glyoxylate aminotransferase	Encodes a peroxisomal photorespiratory enzyme that catalyzes transamination reactions with multiple substrates. It is involved in photorespiration.	0	0	-1.30417	1.20919e-16
AT5G13650	SVR3	SUPPRESSOR OF VARIEGATION 3	Encodes SVR3, a putative chloroplast TypA translation elongation GTPase. Loss of SVR3 suppresses variegation mediated by var2. SVR3 is essential for plants’ ability to develop functional chloroplasts under chilling stress (8C), but not at normal temperature (22C).	0	0	-1.31024	2.83426e-30
AT5G11420	AT5G11420		Encodes a DUF642 cell wall protein.	0	0	-1.3245	2.53499e-44
AT3G24430	HCF101	HIGH-CHLOROPHYLL-FLUORESCENCE 101	Encodes chloroplast protein HCF101 (high chlorophyll fluorescence 101). Serves as a chloroplast scaffold protein that specifically assembles [4Fe-4S] clusters and transfers them to the chloroplast membrane and soluble target proteins.	0	0	-1.32639	1.55623e-20
AT4G39260	CCR1	cold, circadian rhythm, and RNA binding 1	Encodes a glycine-rich protein with RNA binding domain at the N-terminus. Protein is structurally similar to proteins induced by stress in other plants. Gene expression is induced by cold. Transcript undergoes circadian oscillations that is depressed by overexpression of AtGRP7. A substrate of the type III effector HopU1 (mono-ADP-ribosyltransferase).	-0.524158	8.83124e-07	-1.32713	4.30603e-30
AT2G47240	LACS1	LONG-CHAIN ACYL-COA SYNTHASE 1	Encodes an acyl-CoA synthetase that acts on long-chain and very-long-chain fatty acids, involved in cuticular wax and cutin biosynthesis The mRNA is cell-to-cell mobile.	0	0	-1.33263	3.69072e-26
AT2G36120	DOT1	DEFECTIVELY ORGANIZED TRIBUTARIES 1	Encodes a glycine rich protein that is involved in leaf vascular patterning. dot1 mutants have an aberrant open-class venation pattern in leaves and cotyledons, as well as several other leaf development defects. The mRNA is cell-to-cell mobile.	-0.507289	0.000162186	-1.33769	1.08546e-22
AT3G02730	TRXF1	thioredoxin F-type 1	Encodes a type-f thioredoxin. Has a role in the short-term activation of carbon metabolism. Loss affects growth under short-day conditions.	0	0	-1.33864	8.51068e-23
AT1G29070	PRPL34			0	0	-1.34102	6.01806e-24
AT5G09660	PMDH2	peroxisomal NAD-malate dehydrogenase 2	encodes a microbody NAD-dependent malate dehydrogenase encodes an peroxisomal NAD-malate dehydrogenase that is involved in fatty acid beta-oxidation through providing NAD to the process of converting fatty acyl CoA to acetyl CoA.	0	0	-1.34398	9.23767e-21
AT1G09340	CRB	chloroplast RNA binding	Encodes CHLOROPLAST RNA BINDING (CRB), a putative RNA-binding protein. CRB is important for the proper functioning of the chloroplast. Mutations in CRB also affects the circadian system, altering the expression of both oscillator and output genes. The mRNA is cell-to-cell mobile.	0	0	-1.34848	3.02906e-15
AT2G38530	LTP2	lipid transfer protein 2	Involved in lipid transfer between membranes and plays a role in maintaining the integrity of the cuticle-cell wall interface. Belongs to a family of Lipid transfer proteins. Sequence similarity to other plant/Arabidopsis LPT genes but highest similarity to LPT1. Stress and pathogen-inducible motifs found in the upstream region. Expressed in flower, leaves and siliques but absent in roots. Predic…	-0.504142	6.00269e-05	-1.34886	9.16887e-18
AT1G51400	AT1G51400			0	0	-1.34959	3.84526e-14
AT5G38520	CLD1		CLD1 is involved in steady-state chlorophyll turnover; CLD1 dephytylates chlorophyll a, chlorophyll b, and pheophytin a in vitro; CLD1 and CHLG form a salvage cycle in recycling chlorophyll. Suppression of CLD1 expression results in reduced tolerance to moderately high temperature.	0	0	-1.35213	3.73064e-19
AT5G61410	RPE	D-ribulose-5-phosphate-3-epimerase	Arabidopsis thaliana ribulose-5-phosphate-3-epimerase mRNA	0	0	-1.35308	4.55084e-22
AT1G03600	PSB27		PSB27 is a chloroplast lumen localized protein that is involved in adaptation to changes in light intensity.	0	0	-1.35501	5.13601e-18
AT1G45201	TLL1	triacylglycerol lipase-like 1	Target of AtGRP7 regulation.	0	0	-1.35881	1.57115e-26
AT2G04842	EMB2761	EMBRYO DEFECTIVE 2761	Encodes a dual localized threonyl-tRNA synthetase found both in the mitochondrion and the chloroplast. Plants mutated in this gene terminate as embryos in the globular stage.	0	0	-1.36072	2.0069e-29
AT1G48600	PMEAMT	phosphoethanolamine N-methyltransferase	Encodes a phosphoethanolamine N-methyltransferase that catalyses the last two methylation steps of the three sequential methylations of phosphoethanolamine (PEA) that are required for the synthesis of phosphocholine (PCho) in plants.	0	0	-1.36146	8.75851e-32
AT3G14420	GOX1	glycolate oxidase 1	Encodes a glycolate oxidase that modulates reactive oxygen species-mediated signal transduction during nonhost resistance. The mRNA is cell-to-cell mobile.	0	0	-1.3657	4.27493e-18
AT3G03780	MS2	methionine synthase 2	Encodes a cytosolic methionine synthase, involved in methionine regeneration via the activated methyl cycle (or SAM cycle)	0	0	-1.36744	1.0238e-27
AT4G17560	AT4G17560			0	0	-1.37533	4.85617e-28
AT3G16420	PBP1	PYK10-binding protein 1	The PBP1(PYK10-binding protein 1) assists the PYK10 (beta-glucosidase complex) in its activity and may act like a molecular chaperone that facilitates the correct polymerization of PYK10, when tissues are damaged and subcellular structures are destroyed by pests. The mRNA is cell-to-cell mobile.	0	0	-1.37561	5.68291e-25
AT4G36360	BGAL3	beta-galactosidase 3	putative beta-galactosidase (BGAL3 gene)	-0.556289	1.72872e-06	-1.37806	3.54998e-25
AT4G15110	CYP97B3	cytochrome P450, family 97, subfamily B, polypeptide 3	member of CYP97B	0	0	-1.38005	2.40513e-24
AT1G42970	GAPB	glyceraldehyde-3-phosphate dehydrogenase B subunit	Encodes chloroplast localized glyceraldehyde-3-phosphate dehydrogenase that can use both NADH and NADPH to reduce 1,3-diphosphate glycerate. It forms A2B2 heterotetramers with GapA forms of the GADPH enzyme. These complexes are active in the light under reducing conditions, but show reduced NADPH-dependent activity in response to oxidized thioredoxins and increased NAD(H)/NADP(H) ratios due to th…	0	0	-1.38184	6.6525e-24
AT1G74730	RIQ2		Encodes a grana core localized protein, is homologous to RIG1. Mutant plants have reduced NPQ, affected organization of light-havesting complex II and an enhanced grana stacking.	0	0	-1.39201	7.0549e-17
AT1G16880	ACR11	ACT domain repeats 11	Encodes a ACT domain-containing protein. The ACT domain, named after bacterial aspartate kinase, chorismate mutase and TyrA (prephenate dehydrogenase), is a regulatory domain that serves as an amino acid-binding site in feedback-regulated amino acid metabolic enzymes. The mRNA is cell-to-cell mobile.	0	0	-1.39368	4.27059e-32
AT2G29550	TUB7	tubulin beta-7 chain	Encodes a beta-tubulin that is expressed in leaves, roots and flowers.	-0.249483	0.0245164	-1.39968	4.07331e-28
AT1G62750	SCO1	SNOWY COTYLEDON 1	Nuclear encoded protein consists of the five domains conserved in EF-G proteins, with two GTP-binding sites in the first domain, and an additional transit peptide at the N-terminus. Localized in chloroplasts. Point mutation results in a delay in the onset of germination. At early developmental stage embryos still contain undifferentiated proplastids. The greening of cotyledons is severely impaire…	0	0	-1.40002	5.97456e-26
AT1G76790	IGMT5	indole glucosinolate O-methyltransferase 5	Encodes a protein with similarity to N-acetylserotonin O-methyltransferase (ASMT) but it does not have ASMT activity in vitro.	0.390231	0.0014534	-1.40093	1.33769e-15
AT4G04830	MSRB5	methionine sulfoxide reductase B5		0	0	-1.40205	5.33324e-16
AT5G54160	OMT1	O-methyltransferase 1	A caffeic acid/5-hydroxyferulic acid O-methyltransferase. Interacts with 14-4-3 proteins in yeast 2 hybrid assay. AtOMT1 (At5g54160) encodes a flavonol 3?-O-methyltransferase that is highly active towards quercetin and myricetin. The substrate specificity identifies the enzyme as flavonol 3?-methyltransferase which replaces the former annotation of the gene to encode a caffeic acid/5-hydroxyferul…	-0.686108	2.65893e-08	-1.40302	2.64045e-31
AT1G20840	TMT1	tonoplast monosaccharide transporter1	The protein encoded by this gene is found in the tonoplast (vacuole membrane) of Arabidopsis cells. The gene is expressed at highest levels in juvenile (sink) and adult (source) leaves, followed by flower tissues.	-1.38626	1.3135e-32	-1.41648	6.88484e-25
AT3G14415	GOX2	glycolate oxidase 2	Encodes a glycolate oxidase that modulates reactive oxygen species-mediated signal transduction during nonhost resistance. The mRNA is cell-to-cell mobile.	-0.303146	0.00785386	-1.42055	5.64682e-26
AT1G11860	AT1G11860			0	0	-1.42298	2.73119e-28
AT1G75380	BBD1	bifunctional nuclease in basal defense response 1	Encodes a nuclease involved in ABA-mediated callose deposition. It has been shown to interact with JAZ proteins, binds to a jasmonic acid-responsive element (JARE) and repress AtJMT expression.	-0.529762	1.50622e-06	-1.42364	2.32344e-29
AT5G13770	AT5G13770			0	0	-1.42555	2.22808e-25
AT3G51600	LTP5	lipid transfer protein 5	Predicted to encode a PR (pathogenesis-related) protein. Belongs to the lipid transfer protein (PR-14) family with the following members: At2g38540/LTP1, At2g38530/LTP2, At5g59320/LTP3, At5g59310/LTP4, At3g51600/LTP5, At3g08770/LTP6, At2g15050/LTP7, At2g18370/LTP8, At2g15325/LTP9, At5g01870/LTP10, At4g33355/LTP11, At3g51590/LTP12, At5g44265/LTP13, At5g62065/LTP14, At4g08530/LTP15.	-0.567377	5.06368e-06	-1.42668	1.48114e-29
AT1G12900	GAPA-2	glyceraldehyde 3-phosphate dehydrogenase A subunit 2		0	0	-1.43336	1.41032e-20
AT3G05730	AT3G05730		Encodes a defensin-like (DEFL) family protein. The mRNA is cell-to-cell mobile.	0.38779	0.0120025	-1.43966	6.84256e-27
AT5G15410	DND1	DEFENSE NO DEATH 1	defense, no death' gene (DND1) encodes a mutated cyclic nucleotide-gated cation channel; Same as CNGC2 (article ID 229): Cyclic nucleotide gated channel, activated by cAMP, conducts K+ and other monovalent cations but excludes Na+, does not contain the GYG amino acid sequence found in other channels with this conductivity profile. Conducts Ca2+ into cells which is linked to the generation of NO a…	-0.895752	1.36365e-10	-1.44978	9.15289e-33
AT4G38970	FBA2	fructose-bisphosphate aldolase 2	Protein is tyrosine-phosphorylated and its phosphorylation state is modulated in response to ABA in Arabidopsis thaliana seeds.	0	0	-1.45466	4.67764e-24
AT5G02760	APD7, SSPP		Encodes a phosphatase that functions in sustaining proper leaf longevity and preventing early senescence by suppressing or perturbing SARK-mediated senescence signal transduction.	-1.3874	2.06285e-22	-1.45524	3.46815e-19
AT1G68530	KCS6	3-ketoacyl-CoA synthase 6	Encodes KCS6, a member of the 3-ketoacyl-CoA synthase family involved in the biosynthesis of VLCFA (very long chain fatty acids).	0	0	-1.45524	1.39815e-31
AT1G15980	PnsB1	Photosynthetic NDH subcomplex B 1	encodes a novel subunit of the chloroplast NAD(P)H dehydrogenase complex, involved in cyclic electron flow around photosystem I to produce ATP.	0	0	-1.45543	5.5297e-21
AT2G34680	AIR9	AUXIN-INDUCED IN ROOT CULTURES 9	isolated from differential screening of a cDNA library from auxin-treated root culture. sequence does not show homology to any known proteins and is predicted to be extracellular.	0	0	-1.45622	3.34054e-24
AT5G62350	AT5G62350			-0.531781	0.000246778	-1.45792	3.50572e-43
AT1G53910	RAP2.12	related to AP2 12	Encodes a member of the ERF (ethylene response factor) subfamily B-2 of ERF/AP2 transcription factor family (RAP2.12). The protein contains one AP2 domain. There are 5 members in this subfamily including RAP2.2 AND RAP2.12. Involved in oxygen sensing. It plays a key role in controlling root bending in response to hypoxia.	-0.72624	4.56185e-14	-1.46088	1.50237e-47
AT5G24165	AT5G24165			0	0	-1.46255	2.0959e-28
AT2G38230	PDX1.1	pyridoxine biosynthesis 1.1	Encodes a protein predicted to function in tandem with PDX2 to form glutamine amidotransferase complex with involved in vitamin B6 biosynthesis. The mRNA is cell-to-cell mobile.	0	0	-1.47013	5.28846e-26
AT1G03630	POR C	protochlorophyllide oxidoreductase C	Encodes for a protein with protochlorophyllide oxidoreductase activity. The enzyme is NADPH- and light-dependent.	0	0	-1.47098	1.00903e-31
AT2G37640	EXP3		member of Alpha-Expansin Gene Family. Naming convention from the Expansin Working Group (Kende et al, 2004. Plant Mol Bio). Involved in the formation of nematode-induced syncytia in roots of Arabidopsis thaliana.	0	0	-1.47366	7.48503e-48
AT4G37410	CYP81F4	cytochrome P450, family 81, subfamily F, polypeptide 4	member of CYP81F The mRNA is cell-to-cell mobile.	0	0	-1.47921	5.97844e-29
AT2G34430	LHB1B1	light-harvesting chlorophyll-protein complex II subunit B1	Photosystem II type I chlorophyll a/b-binding protein The mRNA is cell-to-cell mobile.	0	0	-1.4825	9.7097e-13
AT5G14740	CA2	carbonic anhydrase 2	Encodes a beta carbonic anhydrase likely to be localized in the cytoplasm. Expression of its mRNA is seen in etiolated seedlings and points to a possible nonphotosynthetic role for this isoform.	0	0	-1.49365	3.75836e-21
AT2G30390	FC2	ferrochelatase 2	Encodes one of two ferrochelatase genes in Arabidopsis. Ferrochelatase is the terminal enzyme of heme biosynthesis. FC-II is speculated to operate in photosynthetic cytochromes.	0	0	-1.49421	1.73004e-33
AT3G49220	PME34			-0.598739	4.19178e-05	-1.49516	4.47073e-38
AT3G61430	PIP1A	plasma membrane intrinsic protein 1A	a member of the plasma membrane intrinsic protein subfamily PIP1. localizes to the plasma membrane and exhibits water transport activity in Xenopus oocyte. expressed ubiquitously and protein level decreases slightly during leaf development. The mRNA is cell-to-cell mobile.	-0.719386	4.53332e-09	-1.49529	6.18285e-34
AT2G15970	COR413-PM1	cold regulated 413 plasma membrane 1	encodes an alpha form of a protein similar to the cold acclimation protein WCOR413 in wheat. Expression is induced by short-term cold-treatment, water deprivation, and abscisic acid treatment. The mRNA is cell-to-cell mobile.	-0.581266	1.31217e-05	-1.49603	2.95999e-40
AT2G01520	MLP328	MLP-like protein 328	Encodes a cis-cinnamic acid responsive gene that is a member of the major latex protein-like gene family and plays a role in promoting vegetative growth and delaying &#64258;owering. The mRNA is cell-to-cell mobile.	-0.98234	2.36337e-17	-1.49794	3.50688e-28
AT4G00360	CYP86A2	cytochrome P450, family 86, subfamily A, polypeptide 2	Encodes a member of the CYP86A subfamily of cytochrome p450 genes. Expressed at moderate levels in flowers, leaves, roots and stems.	-1.26296	1.01464e-16	-1.49827	7.66737e-36
AT4G25100	FSD1	Fe superoxide dismutase 1	Fe-superoxide dismutase	0	0	-1.50039	2.14161e-24
AT3G16770	EBP	ethylene-responsive element binding protein	Encodes a member of the ERF (ethylene response factor) subfamily B-2 of the plant specific ERF/AP2 transcription factor family (RAP2.3). The protein contains one AP2 domain. There are 5 members in this subfamily including RAP2.2 AND RAP2.12.It is localized to the nucleus and acts as a transcriptional activator through the GCC-box. It has been identified as a suppressor of Bax-induced cell death b…	-0.337996	0.00557399	-1.50206	5.65754e-37
AT1G74470	AT1G74470		Encodes for a multifunctional protein with geranylgeranyl reductase activity shown to catalyze the reduction of prenylated geranylgeranyl-chlorophyll a to phytyl-chlorophyll a (chlorophyll a) and free geranylgeranyl pyrophosphate to phytyl pyrophosphate. The mRNA is cell-to-cell mobile.	0	0	-1.50255	1.29263e-22
AT1G68010	HPR	hydroxypyruvate reductase	Encodes hydroxypyruvate reductase.	0	0	-1.50384	2.86938e-22
AT2G36990	SIGF	RNApolymerase sigma-subunit F	Encodes a general sigma factor in chloroplasts and is probably responsible for the recognition of sigma 70 type standard bacteria-type multi-subunit RNA polymerase (PEP) promoters in young cotyledons. It is a substrate for regulatory phosphorylation by cpCK2, a nuclear-coded plastid-targeted casein kinase 2, that has been implicated as a key component in plant sigma factor phosphorylation and tra…	0	0	-1.50416	1.18396e-26
AT1G73330	DR4	drought-repressed 4	encodes a plant-specific protease inhibitor-like protein whose transcript level in root disappears in response to progressive drought stress. The decrease in transcript level is independent from abscisic acid level.	-0.617137	1.22021e-06	-1.50578	2.66118e-27
AT2G39570	ACR9	ACT domain repeats 9	Encodes a ACT domain-containing protein. The ACT domain, named after bacterial aspartate kinase, chorismate mutase and TyrA (prephenate dehydrogenase), is a regulatory domain that serves as an amino acid-binding site in feedback-regulated amino acid metabolic enzymes.	-1.06358	5.96259e-21	-1.5088	2.22791e-32
AT3G09260	PYK10		Encodes beta-glucosidase.The major constituent of ER bodies. One of the most abundant proteins in Arabidopsis seedlings. Exist in an soluble (inactive) and non-soluble (active) form, most probably formed in a polymerization process. Involved in the mutualistic interaction between Arabidopsis and the endophytic fungus Piriformospora indica.	-0.541438	3.62067e-05	-1.50994	1.64247e-26
AT3G16370	AT3G16370		GDSL-motif esterase/acyltransferase/lipase. Enzyme group with broad substrate specificity that may catalyze acyltransfer or hydrolase reactions with lipid and non-lipid substrates. The mRNA is cell-to-cell mobile.	0	0	-1.51041	4.1651e-52
AT5G13630	GUN5	GENOMES UNCOUPLED 5	Encodes magnesium chelatase involved in plastid-to-nucleus signal transduction.	0	0	-1.51075	9.57157e-15
AT1G52870	AT1G52870			0	0	-1.51904	5.82306e-36
AT3G54050	HCEF1	high cyclic electron flow 1	Encodes a chloroplastic fructose 1,6-bisphosphate phosphatase. also known as HCEF1 (High Cyclic Electron Flow 1). hcef1 mutants have constitutively elevated electron flow (CEFI) and plants with antisense suppression of this enzyme have higher levels of net leaf photosynthesis and increased sucrose biosynthesis. The mRNA is cell-to-cell mobile.	0	0	-1.5203	1.07823e-26
AT1G16720	HCF173	high chlorophyll fluorescence phenotype 173	Encodes HCF173, a protein with weak similarities to the superfamily of the short-chain dehydrogenases/reductases. HCF173 is involved in the initiation of translation of the psbA mRNA and binds a specific site in the 5' UTR of psbA mRNA. Mutants shows a high chlorophyll fluorescence phenotype (hcf) and are severely affected in the accumulation of PSII subunits. The protein HCF173 is localized in t…	-0.258541	0.0153837	-1.52199	9.99135e-43
AT3G53420	PIP2A	plasma membrane intrinsic protein 2A	a member of the plasma membrane intrinsic protein subfamily PIP2. localizes to the plasma membrane and exhibits water transport activity in Xenopus oocyte. expressed specifically in the vascular bundles and protein level increases slightly during leaf dev. When expressed in yeast cells can conduct hydrogen peroxide into those cells.	0	0	-1.52398	8.28505e-29
AT4G36670	PMT6	polyol/monosaccharide transporter 6		-1.03729	5.56544e-21	-1.52493	1.35982e-44
AT3G05900	AT3G05900			0	0	-1.53194	3.91741e-28
AT3G55800	SBPASE	sedoheptulose-bisphosphatase	Encodes the chloroplast enzyme sedoheptulose-1,7-bisphosphatase (SBPase), involved in the carbon reduction of the Calvin cycle. Increase in SBPase activity in transgenic lines accumulate up to 50% more sucrose and starch than wild-type. The mRNA is cell-to-cell mobile.	0	0	-1.54014	4.08163e-22
AT1G68520	BBX14	B-box domain protein 14		-0.528769	1.12953e-07	-1.54232	2.3187e-49
AT3G50740	UGT72E1	UDP-glucosyl transferase 72E1	UGT72E1 is an UDPG:coniferyl alcohol glucosyltransferase which specifically glucosylates sinapyl- and coniferyl aldehydes. The enzyme is thought to be involved in lignin metabolism.	-0.507197	0.0014534	-1.54698	6.52131e-54
AT4G32460	AthA1-1, BDX, BIIDXI		BDX is a DUF642 cell wall protein primarily expressed in vascular tissues of roots, leaves and embryos. Mutants show defects in seed and embryo development.	0	0	-1.55951	2.25985e-39
AT1G03130	PSAD-2	photosystem I subunit D-2	Encodes a protein predicted by sequence similarity with spinach PsaD to be photosystem I reaction center subunit II (PsaD2)	-0.370013	0.000809539	-1.56308	7.47943e-19
AT2G05920	SBT1.8			0	0	-1.57056	2.04566e-42
AT4G22490	AT4G22490			0	0	-1.57409	2.3106e-23
AT1G64680	AT1G64680			0	0	-1.58269	2.54806e-27
AT5G01590	TIC56			0.281521	0.0166193	-1.58296	1.98723e-26
AT1G32060	PRK	phosphoribulokinase		0	0	-1.5905	3.93325e-24
AT1G25440	BBX15	B-box domain protein 15		0	0	-1.59376	1.9848e-30
AT1G28290	AGP31	arabinogalactan protein 31	Encodes an atypical arabinogalactan protein that is localized to the plasma membrange. AGP31 is highly expressed in flowers and vascular tissue and is repressed by jasmonic acid. AGP31 may play a role in vascular tissue function during defense and development.	0	0	-1.59445	4.50286e-55
AT4G38770	PRP4	proline-rich protein 4	Encodes one of four proline-rich proteins in Arabidopsis which are predicted to localize to the cell wall. Transcripts are most abundant in aerial organs of the plant.	-0.318662	0.0349866	-1.5993	5.89993e-40
AT2G26080	GLDP2	glycine decarboxylase P-protein 2		-0.863713	4.60451e-13	-1.60372	8.63997e-35
AT1G27950	LTPG1	glycosylphosphatidylinositol-anchored lipid protein transfer 1	Encodes LTPG1, a lipid transfer protein with a predicted GPI (glycosylphosphatidylinositol)-anchor domain. Localized in the plasma membrane. Disruption of the LTPG1 gene causes alterations of cuticular lipid composition, but no significant changes on total wax and cutin monomer loads are seen. The mRNA is cell-to-cell mobile.	-0.848736	3.49845e-12	-1.60484	1.64092e-34
AT4G16980	AT4G16980			-1.46506	3.54314e-33	-1.60919	1.41319e-35
AT5G04810	PPR4		Pentatricopeptide which is essential during the early stages of embryo development and acts in the plastid nucleoids as the factor responsible of rps12 intron 1 trans-splicing and, indirectly, in the assembly of 70S ribosomes and plastid translation.	0	0	-1.61018	5.7755e-28
AT4G13430	IIL1	isopropyl malate isomerase large subunit 1	Encodes a methylthioalkylmalate isomerase involved in glucosinolate biosynthesis.	0	0	-1.61498	2.82476e-58
AT2G14890	AGP9	arabinogalactan protein 9	putative proline-rich protein (At2g14890) mRNA, complete The mRNA is cell-to-cell mobile.	0	0	-1.62747	1.66923e-33
AT3G32980	AT3G32980			-0.609239	1.09248e-05	-1.62784	2.02626e-35
AT2G45470	FLA8	FASCICLIN-like arabinogalactan protein 8	Fasciclin-like arabinogalactan protein. Possibly involved in embryogenesis and seed development.	-0.333471	0.0163524	-1.62833	1.04276e-32
AT2G06850	XTH4	xyloglucan endotransglucosylase/hydrolase 4	endoxyloglucan transferase (EXGT-A1) gene	-1.20426	7.48384e-11	-1.6324	5.68678e-31
AT4G33010	GLDP1	glycine decarboxylase P-protein 1		0	0	-1.63553	2.6447e-22
AT2G39730	RCA	rubisco activase	Rubisco activase, a nuclear-encoded chloroplast protein that consists of two isoforms arising from alternative splicing in most plants. Required for the light activation of rubisco. Involved in jasmonate-induced leaf senescence.	0	0	-1.64484	1.01489e-18
AT1G31330	PSAF	photosystem I subunit F	Encodes subunit F of photosystem I.	0	0	-1.6494	1.18259e-21
AT1G49660	CXE5	carboxyesterase 5	Encodes a protein with carboxylesterase whose activity was tested using pNA.	-1.09504	1.61461e-16	-1.66676	1.29583e-33
AT3G01500	CA1	carbonic anhydrase 1	Encodes a putative beta-carbonic anhydrase betaCA1. Together with betaCA4 (At1g70410) regulates CO2-controlled stomatal movements in guard cells, as well as attenuates immunity. Differential CA gene expression in response to changing atmospheric CO2 conditions contribute to altered disease resistance levels. Activated by OXS2 under the treatment of salt.	0	0	-1.67596	7.33093e-18
AT4G28660	PSB28	photosystem II reaction center PSB28 protein	Similar to PsbW subunit of photosystem II.	0	0	-1.67823	8.84778e-31
AT4G09650	ATPD	ATP synthase delta-subunit gene	Encodes the chloroplast ATPase delta-subunit. The mRNA is cell-to-cell mobile.	0	0	-1.69232	4.70934e-36
AT5G52882	AT5G52882			-1.19893	4.90499e-25	-1.69432	2.38611e-56
AT4G12420	SKU5		Encodes a protein of unknown function involved in directed root tip growth. It is a member of 19-member gene family and is distantly related structurally to the multiple-copper oxidases ascorbate oxidase and laccase, though it lacks the copper-binding domains. The protein is glycosylated and GPI-anchored. It is localized to the plasma membrane and the cell wall. The gene is expressed most strongl…	-1.17303	4.60362e-33	-1.69614	4.50012e-49
AT1G09750	AT1G09750			0	0	-1.70086	1.82555e-21
AT4G12730	FLA2	FASCICLIN-like arabinogalactan 2	AF333971 Arabidopsis thaliana fasciclin-like arabinogalactan-protein 2 (Fla2) mRNA, complete cds. Fasciclin-like arabinogalactan protein. Possibly involved in embryogenesis and seed development.	-1.49053	1.87457e-28	-1.70215	9.34435e-43
AT3G23810	SAHH2	S-adenosyl-l-homocysteine (SAH) hydrolase 2		-0.525352	1.28453e-05	-1.70435	1.76054e-47
AT1G62660	VI1			-1.41257	3.16339e-24	-1.72578	2.29813e-47
AT2G41560	ACA4	autoinhibited Ca(2 )-ATPase, isoform 4	Encodes a calmodulin-regulated Ca(2+)-ATPase that improves salt tolerance in yeast. Localized to the vacuole. Lesion mimic phenotype when mutation in the gene is combined with a mutation in ACA11. Lesion mimic phenotype of double knockout can be suppressed by nutritional supplements that increase anion levels (e.g. 15 mM Nitrate, Chloride, or Phosphate).	-0.613737	2.81291e-10	-1.72855	8.25326e-53
AT4G37800	XTH7	xyloglucan endotransglucosylase/hydrolase 7		-0.644853	1.63569e-06	-1.73303	8.35644e-48
AT4G25050	ACP4	acyl carrier protein 4	encodes an acyl carrier protein predominantly expressed in leaves. Gene expression is upregulated by light.	-0.460811	3.77672e-05	-1.73312	8.02715e-39
AT5G14200	IMD1	isopropylmalate dehydrogenase 1	The AtIMD1 is one out of 3 genes encoding the enzyme 3-isopropylmalate dehydrogenase involved in leucine biosynthesis in Arabidopsis. Its subcellular location has been targeted to plastids. Encodes methylthioalkylmalate dehydrogenase. Involved in glucosinolate biosynthesis, in methionine chain elongation. The mRNA is cell-to-cell mobile.	0.459291	0.00054882	-1.73763	2.61866e-57
AT3G62410	CP12-2	CP12 domain-containing protein 2	CP12-2 encodes a small peptide found in the chloroplast stroma. It belongs to the CP12 gene family thought to be involved in the formation of a supramolecular complex with glyceraldehyde-3-phosphate dehydrogenase (GAPDH) and phosphoribulokinase (PRK) embedded in the Calvin cycle. CP12-2 is coordinately regulated by light with the photosynthetic GAPDH and PRK. The annotation of this gene is based …	0	0	-1.74474	1.81311e-42
AT5G08050	RIQ1		Encodes a grana core localized protein. Mutant plants have reduced NPQ, affected organization of light-havesting complex II and an enhanced grana stacking.	0	0	-1.76789	1.22857e-24
AT2G43535	AT2G43535		Encodes a defensin-like (DEFL) family protein.	0	0	-1.78865	4.79558e-29
AT1G78020	FLZ6		FCS like zinc finger 6 is induced during energy starvation through SnRK1 signaling. Mutants accumulate more SnRK1alpha1 which results in the inhibition of seedling growth under favorable growth conditions. Increased SnRK1 activity in the mutant also results in the downregulation of TOR signaling (DOI:10.1111/tpj.13854).	0	0	-1.79994	2.37869e-35
AT4G17870	PYR1	PYRABACTIN RESISTANCE 1	Encodes a member of the PYR (pyrabactin resistance )/PYL(PYR1-like)/RCAR (regulatory components of ABA receptor) family proteins with 14 members. PYR/PYL/RCAR family proteins function as abscisic acid sensors. Mediate ABA-dependent regulation of protein phosphatase 2Cs ABI1 and ABI2.	-0.9742	5.45833e-14	-1.80202	1.78523e-37
AT3G15850	FAD5	fatty acid desaturase 5	Chloroplastic enzyme responsible for the synthesis of 16:1 fatty acids from galactolipids and sulpholipids. Uses ferredoxin as electron donor. The mRNA is cell-to-cell mobile.	-0.825766	1.72473e-17	-1.81171	9.51886e-40
AT2G21330	FBA1	fructose-bisphosphate aldolase 1		0	0	-1.82388	4.76859e-25
AT4G12480	EARLI1	EARLY ARABIDOPSIS ALUMINUM INDUCED 1	Encodes a putative lipid transfer protein, vernalization-responsive and cold-induced. It is involved in priming the SAR and ISR responses, specifically in propagating the cell-to-cell mobile signal.	-1.39661	1.18445e-41	-1.85478	9.26851e-20
AT3G61870	AT3G61870			0.235682	0.0332102	-1.85965	3.58297e-27
AT2G15620	NIR1	nitrite reductase 1	Involved in the second step of nitrate assimilation. Its expression is induced by nitrate. The mRNA is cell-to-cell mobile.	-0.494846	1.90407e-06	-1.87775	1.46765e-56
AT4G23400	PIP1;5	plasma membrane intrinsic protein 1;5		0	0	-1.89516	1.07591e-51
AT3G19450	ATCAD4		Encodes a catalytically active cinnamyl alcohol dehydrogenase which uses p-coumaryl aldehyde as a preferred substrate. It can also use caffeyl, coniferyl and d-hydroxyconiferyl aldehydes as substrates. The mRNA is cell-to-cell mobile.	-0.732197	8.00927e-13	-1.9009	1.63784e-78
AT1G06640	AT1G06640		encodes a protein whose sequence is similar to a 2-oxoglutarate-dependent dioxygenase The mRNA is cell-to-cell mobile.	-1.00101	1.39995e-24	-1.90275	1.23374e-67
AT1G28660	AT1G28660		GDSL-motif esterase/acyltransferase/lipase. Enzyme group with broad substrate specificity that may catalyze acyltransfer or hydrolase reactions with lipid and non-lipid substrates.	0	0	-1.90294	1.78788e-42
AT3G15950	NAI2		Similar to TSK-associating protein 1 (TSA1), contains 10 EFE repeats, a novel repeat sequence unique to plants. Expressed preferentially in the roots.Protein is localized to ER bodies- an endoplasmic reticulum derived structure. Loss of function mutations lack ER bodies.	-0.72272	1.50808e-08	-1.90493	4.74759e-51
AT3G25830	TPS-CIN	terpene synthase-like sequence-1,8-cineole	Encodes the monoterpene 1,8-cineole synthase, atTPS-Cin. This polypeptide was also shown to synthesize other monoterpenes albeit in minor quantities. The same polypeptide is encoded at two different loci, the result of gene duplication: at3g25820 and at3g25830.	-0.922925	1.08672e-06	-1.91165	3.10074e-11
AT4G12550	AIR1	Auxin-Induced in Root cultures 1	isolated from differential screening of a cDNA library from auxin-treated root culture. encodes a protein that is related to a large family of proteins that consist of a proline-rich or glycine-rich N-terminus and a hydrophobic, possibly membrane spanning C-terminus.	0	0	-1.91899	4.99022e-20
AT3G63160	OEP6	outer envelope protein 6	Member of the Arabidopsis 7-kDa OEP family. Tail-anchored (TA) membrane protein which possesses a single C-terminal transmembrane domain targeting post-translationally to plastids.	0	0	-1.94668	4.52627e-58
AT2G26500	AT2G26500			0	0	-1.95455	5.10839e-40
AT1G75500	WAT1	Walls Are Thin 1	An Arabidopsis thaliana homolog of Medicago truncatula NODULIN21 (MtN21). The gene encodes a plant-specific, predicted integral membrane protein and is a member of the Plant-Drug/Metabolite Exporter (P-DME) family (Transporter Classification number: TC 2.A.7.3) and the nodulin MtN21-like transporter family.	-0.270064	0.0288594	-1.95992	1.57149e-66
AT4G11320	AtCP2, CP2			-0.395964	0.00023817	-1.96252	9.5889e-56
AT2G10940	AT2G10940			-1.61134	9.8778e-35	-1.97564	3.17859e-36
AT5G38420	RBCS2B	Rubisco small subunit 2B	Encodes a member of the Rubisco small subunit (RBCS) multigene family: RBCS1A (At1g67090), RBCS1B (At5g38430), RBCS2B (At5g38420), and RBCS3B (At5g38410). Activated by OXS2 under the treatment of salt.	-0.378655	0.00167039	-2.00305	1.15012e-27
AT1G54000	GLL22	GDSL lipase-like protein 22	GDSL-motif esterase/acyltransferase/lipase. Enzyme group with broad substrate specificity that may catalyze acyltransfer or hydrolase reactions with lipid and non-lipid substrates.	0	0	-2.01861	1.84999e-66
AT1G12110	NRT1.1	nitrate transporter 1.1	Encodes NRT1.1 (CHL1), a dual-affinity nitrate transporter. The protein is expressed in guard cells and function in stomatal opening. Mutants have less transpiration and are more tolerant to drought. Expressed in lateral roots. Involved in nitrate signaling which enables the plant root system to detect and exploit nitrate-rich soil patches. Comparing to the wild type, the mutant displays a strong…	-0.756819	4.31826e-05	-2.07695	8.23579e-66
AT1G75460	AT1G75460			0	0	-2.08147	3.48547e-43
AT5G64040	PSAN		Encodes the only subunit of photosystem I located entirely in the thylakoid lumen. May be involved in the interaction between plastocyanin and the photosystem I complex. Phosphorylation of this protein is dependent on calcium.	0	0	-2.0865	2.09386e-28
AT1G29670	GDSL1		GDSL-motif esterase/acyltransferase/lipase. Enzyme group with broad substrate specificity that may catalyze acyltransfer or hydrolase reactions with lipid and non-lipid substrates. The mRNA is cell-to-cell mobile.	-1.13434	3.47577e-12	-2.09903	1.25556e-50
AT2G36830	GAMMA-TIP	gamma tonoplast intrinsic protein	Encodes a tonoplast intrinsic protein, which functions as water channel. It has also been shown to be able to facilitate the transport of urea and hydrogen peroxide. Highly expressed in vascular tissues of the root, stem, cauline leaves and flowers but not in the apical meristems. The mRNA is cell-to-cell mobile.	-0.599619	5.69001e-07	-2.10828	1.15187e-74
AT5G44020	AT5G44020			-1.33026	1.40335e-23	-2.16848	3.10552e-53
AT5G49730	FRO6	ferric reduction oxidase 6	Encodes a plasma membrane-located ferric chelate reductase. Its mRNA is expressed in green aerial tissues (shoot, flower and cotyledon) in a light- and cell differentiation-specific manner.	0	0	-2.18294	2.89246e-23
AT1G03870	FLA9	FASCICLIN-like arabinoogalactan 9	fasciclin-like arabinogalactan-protein 9 (Fla9). Possibly involved in embryogenesis and seed development.	-2.03114	1.02943e-35	-2.19002	2.84462e-89
AT2G23600	ACL	acetone-cyanohydrin lyase	Encodes a protein shown to have carboxylesterase activity, methyl salicylate esterase activity, methyl jasmonate esterase activity, and methyl IAA esterase activity in vitro. MES2 appears to be involved in MeSA hydrolysis in planta. This protein does not act on MeGA4, or MEGA9 in vitro and has been show to be capable of hydrolyzing methyl ester nicotinate back to nicotinate.	-1.30308	2.83515e-25	-2.19583	3.61201e-80
AT3G23430	PHO1	phosphate 1	Encodes a protein with the mainly hydrophilic N-terminal and the C-terminal containing 6 potential membrane-spanning domains. The mutant is deficient in the transfer of phosphate from root epidermal and cortical cells to the xylem. Its expression is repressed by phosphate (Pi) in shoots, and transiently induced by phosphite (Phi) in roots and shoots. PHO is expressed in developing ovules and play…	0	0	-2.19913	8.47026e-33
AT5G26280	AT5G26280			-1.0734	2.76545e-14	-2.21464	7.1981e-52
AT5G59090	SBT4.12	subtilase 4.12		-0.505944	0.0127886	-2.22011	1.9403e-64
AT1G58290	HEMA1		Encodes a protein with glutamyl-tRNA reductase (GluTR) activity, catalyzing the NADPH-dependent reduction of Glu-tRNA(Glu) to glutamate 1-semialdehyde (GSA) with the release of free tRNA(Glu). It is involved in the early steps of chlorophyll biosynthesis.	-0.775088	2.18395e-11	-2.23791	2.56165e-60
AT1G70850	MLP34	MLP-like protein 34		-0.873915	4.93505e-15	-2.27001	1.51075e-89
AT5G20700	AT5G20700			-0.43307	0.000221366	-2.27313	3.4013e-44
AT1G07890	APX1	ascorbate peroxidase 1	Encodes a cytosolic ascorbate peroxidase APX1. Ascorbate peroxidases are enzymes that scavenge hydrogen peroxide in plant cells. Eight types of APX have been described for Arabidopsis: three cytosolic (APX1, APX2, APX6), two chloroplastic types (stromal sAPX, thylakoid tAPX), and three microsomal (APX3, APX4, APX5) isoforms. At least part of the induction of heat shock proteins during light stres…	-0.468775	1.63522e-05	-2.28862	5.76433e-76
AT2G37170	PIP2B	plasma membrane intrinsic protein 2	a member of the plasma membrane intrinsic protein subfamily PIP2. localizes to the plasma membrane and exhibits water transport activity in Xenopus oocyte. expressed specifically in the vascular bundles and protein level increases slightly during leaf dev	-0.562775	3.71109e-06	-2.30212	3.5882e-75
AT2G45180	DRN1		nsLTP family-related gene. Expression is strongly suppressed by bacterial pathogens. Mutants are more susceptible to pathogens and abiotic stressors suggesting a function in basal stress response.	-1.75244	1.84691e-27	-2.31314	3.05594e-49
AT5G38430	RBCS1B	Rubisco small subunit 1B	Encodes a member of the Rubisco small subunit (RBCS) multigene family: RBCS1A (At1g67090), RBCS1B (At5g38430), RBCS2B (At5g38420), and RBCS3B (At5g38410).	-0.639299	3.76102e-08	-2.32545	4.05441e-49
AT1G64860	SIGA	sigma factor A	Subunit of chloroplast RNA polymerase, confers the ability to recognize promoter sequences on the core enzyme	0	0	-2.3303	1.97091e-40
AT2G22170	PLAT2	PLAT domain protein 2		-0.886642	1.02078e-17	-2.36481	5.38561e-71
AT5G13930	TT4	TRANSPARENT TESTA 4	Encodes chalcone synthase (CHS), a key enzyme involved in the biosynthesis of flavonoids. Required for the accumulation of purple anthocyanins in leaves and stems. Also involved in the regulation of auxin transport and the modulation of root gravitropism. The mRNA is cell-to-cell mobile.	0	0	-2.38719	1.09145e-77
AT1G72610	GER1	germin-like protein 1	germin-like protein (GLP1)	-1.99915	1.17607e-34	-2.3948	3.23805e-45
AT1G66270	BGLU21		BGLU21 encodes a beta-glucosidase that has a high level of activity against the naturally occuring secondary metabolite scopolin. Recombinant BGLU21 produced in insect cells shows lower levels of activity using the structurally similar substrates esculin (33%) and 4-MU-glucoside (9%). BGLU21 is glycosylated in planta and has a C-terminal ER retention signal. Transcript analysis as well as protein…	-0.576431	9.72184e-05	-2.40332	3.08876e-82
AT4G10120	ATSPS4F		Encodes a protein with putative sucrose-phosphate synthase activity.	0	0	-2.46766	1.83315e-123
AT4G13770	CYP83A1	cytochrome P450, family 83, subfamily A, polypeptide 1	Encodes a cytochrome p450 enzyme that catalyzes the initial conversion of aldoximes to thiohydroximates in the synthesis of glucosinolates not derived from tryptophan. Also has a role in auxin homeostasis.	0.422108	0.00100673	-2.5108	3.60753e-79
AT2G01530	MLP329	MLP-like protein 329		-1.73759	8.67115e-32	-2.5509	5.65449e-72
AT5G37990	CIMT1		SABATH family methyltransferase.	0	0	-2.55963	3.35375e-39
AT4G35090	CAT2	catalase 2	Encodes a peroxisomal catalase, highly expressed in bolts and leaves. mRNA expression patterns show circadian regulation with mRNA levels being high in the subjective early morning. Loss of function mutations have increased H2O2 levels and increased H2O2 sensitivity. Mutants accumulate more toxic ions yet show decreased sensitivity to Li+. This decreased sensitivity is most likely due to an insen…	-0.504168	0.000100461	-2.56152	6.84842e-53
AT2G38380	AT2G38380			-0.766294	2.82779e-12	-2.57774	2.71291e-94
AT3G14940	PPC3	phosphoenolpyruvate carboxylase 3	Encodes a cytosolic phosphoenolpyruvate carboxylase (PEPC) that has activity when expressed in E.coli. Its mRNA is most abundantly expressed in roots and siliques. PPC3 belongs to the plant-type PEPC family. It can form an enzymatically active complex with a castor bean ortholog of PPC4, which encodes a bacterial-type PEPC. The mRNA is cell-to-cell mobile.	0	0	-2.67198	6.95351e-83
AT1G75750	GASA1	GAST1 protein homolog 1	GA-responsive GAST1 protein homolog regulated by BR and GA antagonistically. Possibly involved in cell elongation based on expression data The mRNA is cell-to-cell mobile.	-1.23893	3.59036e-30	-2.7226	2.36175e-32
AT4G12545	AT4G12545			0	0	-2.75782	2.66944e-36
AT3G47070	AT3G47070			-0.308327	0.00559096	-2.76387	1.2081e-46
AT1G60950	FED A		encodes a major leaf ferredoxin	-0.340784	0.00416291	-2.78343	3.58717e-65
AT5G26260	AT5G26260			-1.2293	4.48472e-18	-2.79214	1.12853e-24
AT1G04040	AT1G04040			-0.972424	5.93567e-20	-2.80806	1.21348e-90
AT3G20370	AT3G20370			-0.373012	0.00517708	-2.86359	1.54548e-102
AT5G23020	IMS2	2-isopropylmalate synthase 2	methylthioalkymalate synthase-like. Also known as 2-isopropylmalate synthase (IMS2). encodes a methylthioalkylmalate synthase involved in the biosynthesis of aliphatic glucosinolates which accepts all the omega-methylthio-2-oxoalkanoic acids needed to form the known C3 to C8 glucosinolates in Arabidopsis. The mRNA is cell-to-cell mobile.	0	0	-2.8698	8.87286e-174
AT5G48010	THAS1	thalianol synthase 1	Encodes an oxidosqualene cyclase involved in the biosynthesis of thalianol, a tricyclic triterpenoid of unknown function. Overexpression of THAS leads to dwarfing in the aerial tissues of Arabidopsis plants, but increases their root length. THAS is part of a small operon-like cluster of genes (with At5g48000 (THAH) and At5g47990 (THAD)) involved in thalianol metabolism.	0	0	-2.91898	7.84463e-21
AT1G32450	NRT1.5	nitrate transporter 1.5	Transmembrane nitrate transporter. Involved in xylem transport of nitrate from root to shoot. Induced in response to high and low concentrations of nitrate. Not involved in nitrate uptake. Expressed in root pericycle cells under the control of MYB59. Also functions as a proton-coupled H+/K+ antiporter for K+ loading into the xylem.	0	0	-2.92919	5.63297e-51
AT4G26530	FBA5	fructose-bisphosphate aldolase 5		0	0	-2.9358	2.67944e-69
AT4G04770	ABCI8	ATP-binding cassette I8	Encodes an iron-stimulated ATPase. A member of the NAP subfamily of ABC transporters. Involved in Fe-S cluster assembly. Similar to SufB. Involved in the regulation of iron homeostasis. Able to form homodimers. Interacts with AtNAP7 inside the chloroplast.	-0.794294	2.5809e-13	-3.04276	6.25033e-191
AT5G43350	PHT1;1	phosphate transporter 1;1	Encodes an inorganic phosphate transporter Pht1;1. Mutants display enhanced arsenic accumulation. Members of the Pht1 family of phosphate transporters include: Pht1;1/At5g43350, Pht1;2/At5g43370, Pht1;3/At5g43360, Pht1;4/At2g38940, Pht1;5/At2g32830, Pht1;6/At5g43340, Pht1;7/At3g54700, Pht1;8/At1g20860, Pht1;9/At1g76430 (Plant Journal 2002, 31:341).	-1.40164	2.81291e-10	-3.07176	1.9855e-68
AT4G13250	NYC1	NON-YELLOW COLORING 1	Encodes a chlorophyll b reductase involved in the degradation of chlorophyll b and LHCII (light harvesting complex II).	-1.11346	8.50778e-25	-3.08658	1.05801e-162
AT4G17340	TIP2;2	tonoplast intrinsic protein 2;2		-1.1068	3.49037e-07	-3.13425	2.87421e-94
AT5G44130	FLA13	FASCICLIN-like arabinogalactan protein 13 precursor	Fasciclin-like arabinogalactan protein. Possibly involved in embryogenesis and seed development.	-3.24734	7.14545e-63	-3.33023	2.54774e-95
AT5G47990	CYP705A5	cytochrome P450, family 705, subfamily A, polypeptide 5	Encodes an endomembrane system-expressed member of the CYP705A family of cytochrome P450 enzymes. It appears to catalyze the addition of a double bond to thalian-diol at carbon 15. Reduced levels of THAD expression lead to a build up of thalian-diol in root extracts. thad1-1 mutants also have longer roots than wild type seedlings and show altered gravitropic responses.	0	0	-3.38775	1.80217e-19
AT2G37130	AT2G37130			-1.57394	2.65153e-15	-3.62362	1.86242e-154
AT5G17170	ENH1	enhancer of sos3-1		-0.632944	6.19746e-07	-3.93976	4.72247e-189
AT5G01600	FER1	ferretin 1	Encodes a ferretin protein that is targeted to the chloroplast. Member of a Ferritin gene family. Gene expression is induced in response to iron overload and by nitric oxide. Expression of the gene is downregulated in the presence of paraquat, an inducer of photoxidative stress.	-1.59997	2.16191e-46	-4.27259	8.67073e-77
AT4G15390	AT4G15390			0	0	-4.77263	2.16618e-252
AT4G30170	PER45			0	0	-5.84686	1.28753e-254
