# Supplementary material for: Dopamine Inhibits Arabidopsis Growth through Increased Oxidative Stress and Auxin Activity
Source: MDPI journal article supplement (doi:10.3390/stresses3010026), 2023-03-02
Supplement: s1 [file s1 › Table S2.xlsx]

## Sheet: 2 hours downregulated
Analysis Type:	PANTHER Overrepresentation Test (Released 20221013)
Annotation Version and Release Date:	GO Ontology database DOI: 10.5281/zenodo.6799722 Released 2022-07-01
Analyzed List:	2 Hours Downregulated (Arabidopsis thaliana)
Reference List:	2 Hours Reference List (Arabidopsis thaliana)
Test Type:	FISHER
Correction:	FDR
GO biological process complete	REFLIST (2278)	Input (218)	expected	over/under	Fold Enrichment	raw P-value	FDR
cell wall biogenesis (GO:0042546)	56	17	5.36	+	3.17	0.000113	0.0198
plant-type cell wall organization or biogenesis (GO:0071669)	64	19	6.12	+	3.1	5.67e-05	0.0118
cell wall organization or biogenesis (GO:0071554)	109	27	10.43	+	2.59	2.72e-05	0.00647
growth (GO:0040007)	129	29	12.35	+	2.35	6.23e-05	0.0122
cellular metabolic process (GO:0044237)	1301	96	124.5	-	0.77	0.000257	0.0372
organonitrogen compound metabolic process (GO:1901564)	853	50	81.63	-	0.61	1.67e-05	0.00463
nitrogen compound metabolic process (GO:0006807)	937	54	89.67	-	0.6	1.5e-06	0.000556
macromolecule metabolic process (GO:0043170)	639	36	61.15	-	0.59	0.000165	0.0262
cellular biosynthetic process (GO:0044249)	605	32	57.9	-	0.55	6.35e-05	0.0118
cellular macromolecule metabolic process (GO:0044260)	363	15	34.74	-	0.43	0.000154	0.0257
cellular nitrogen compound metabolic process (GO:0034641)	524	20	50.15	-	0.4	4.66e-07	0.000259
protein metabolic process (GO:0019538)	487	18	46.6	-	0.39	8.91e-07	0.000371
nucleobase-containing compound metabolic process (GO:0006139)	220	6	21.05	-	0.28	0.000185	0.028
macromolecule biosynthetic process (GO:0009059)	264	7	25.26	-	0.28	3.12e-05	0.00692
cellular macromolecule biosynthetic process (GO:0034645)	250	6	23.92	-	0.25	2.02e-05	0.00517
cellular amide metabolic process (GO:0043603)	259	6	24.79	-	0.24	9.48e-06	0.00287
cellular nitrogen compound biosynthetic process (GO:0044271)	352	7	33.69	-	0.21	2.53e-08	4.21e-05
organonitrogen compound biosynthetic process (GO:1901566)	404	8	38.66	-	0.21	1.41e-09	4.71e-06
gene expression (GO:0010467)	288	5	27.56	-	0.18	2.24e-07	0.000187
amide biosynthetic process (GO:0043604)	233	4	22.3	-	0.18	4.81e-06	0.0016
translation (GO:0006412)	211	2	20.19	-	0.1	7.1e-07	0.000338
peptide biosynthetic process (GO:0043043)	214	2	20.48	-	0.1	4.6e-07	0.000307
peptide metabolic process (GO:0006518)	228	2	21.82	-	0.09	1.26e-07	0.00014

## Sheet: 2 hours upregulated
Analysis Type:	PANTHER Overrepresentation Test (Released 20221013)
Annotation Version and Release Date:	GO Ontology database DOI: 10.5281/zenodo.6799722 Released 2022-07-01
Analyzed List:	2 Hours Upregulated (Arabidopsis thaliana)
Reference List:	2 Hours Reference List (Arabidopsis thaliana)
Test Type:	FISHER
Correction:	FDR
GO biological process complete	REFLIST (2278)	Input (285)	expected	over/under	Fold Enrichment	raw P-value	FDR
indolalkylamine biosynthetic process (GO:0046219)	7	7	0.88	+	7.99	0.000336	0.0109
tryptophan biosynthetic process (GO:0000162)	7	7	0.88	+	7.99	0.000336	0.0108
indolalkylamine metabolic process (GO:0006586)	14	14	1.75	+	7.99	3.08e-07	2.14e-05
tryptophan metabolic process (GO:0006568)	14	14	1.75	+	7.99	3.08e-07	2.09e-05
indole-containing compound catabolic process (GO:0042436)	9	8	1.13	+	7.1	0.00021	0.00736
camalexin metabolic process (GO:0052317)	7	6	0.88	+	6.85	0.00156	0.0383
camalexin biosynthetic process (GO:0010120)	7	6	0.88	+	6.85	0.00156	0.038
response to chitin (GO:0010200)	26	22	3.25	+	6.76	8.92e-10	9.28e-08
cellular biogenic amine biosynthetic process (GO:0042401)	12	10	1.5	+	6.66	4.73e-05	0.00207
amine biosynthetic process (GO:0009309)	12	10	1.5	+	6.66	4.73e-05	0.00205
cellular biogenic amine metabolic process (GO:0006576)	21	17	2.63	+	6.47	1.26e-07	9.52e-06
cellular amine metabolic process (GO:0044106)	21	17	2.63	+	6.47	1.26e-07	9.31e-06
defense response by callose deposition (GO:0052542)	15	12	1.88	+	6.39	1.06e-05	0.000581
indole glucosinolate metabolic process (GO:0042343)	14	11	1.75	+	6.28	2.84e-05	0.00129
phytoalexin biosynthetic process (GO:0052315)	9	7	1.13	+	6.22	0.00092	0.0253
phytoalexin metabolic process (GO:0052314)	9	7	1.13	+	6.22	0.00092	0.0251
indole phytoalexin metabolic process (GO:0046217)	9	7	1.13	+	6.22	0.00092	0.0249
indole phytoalexin biosynthetic process (GO:0009700)	9	7	1.13	+	6.22	0.00092	0.0247
toxin biosynthetic process (GO:0009403)	9	7	1.13	+	6.22	0.00092	0.0245
aromatic amino acid family metabolic process (GO:0009072)	32	24	4	+	5.99	8.15e-10	8.76e-08
defense response by callose deposition in cell wall (GO:0052544)	12	9	1.5	+	5.99	0.000201	0.00728
defense response by cell wall thickening (GO:0052482)	12	9	1.5	+	5.99	0.000201	0.0072
aromatic amino acid family biosynthetic process (GO:0009073)	15	11	1.88	+	5.86	4.43e-05	0.00197
induced systemic resistance (GO:0009682)	11	8	1.38	+	5.81	0.000534	0.0159
callose localization (GO:0052545)	18	13	2.25	+	5.77	9.83e-06	0.000546
indole-containing compound biosynthetic process (GO:0042435)	25	18	3.13	+	5.75	1.84e-07	1.33e-05
amine metabolic process (GO:0009308)	24	17	3	+	5.66	4.84e-07	3.16e-05
regulation of immune system process (GO:0002682)	20	14	2.5	+	5.6	5.72e-06	0.000329
auxin biosynthetic process (GO:0009851)	10	7	1.25	+	5.6	0.00142	0.0355
polysaccharide localization (GO:0033037)	19	13	2.38	+	5.47	1.49e-05	0.000765
indole-containing compound metabolic process (GO:0042430)	46	31	5.76	+	5.39	1.67e-11	2.43e-09
negative regulation of cell death (GO:0060548)	12	8	1.5	+	5.33	0.000805	0.0229
jasmonic acid biosynthetic process (GO:0009695)	12	8	1.5	+	5.33	0.000805	0.0227
response to oomycetes (GO:0002239)	15	10	1.88	+	5.33	0.000176	0.00644
cellular response to oxygen levels (GO:0071453)	68	44	8.51	+	5.17	1.62e-15	4.5e-13
cell wall thickening (GO:0052386)	14	9	1.75	+	5.14	0.000456	0.0142
callose deposition in cell wall (GO:0052543)	14	9	1.75	+	5.14	0.000456	0.0141
salicylic acid mediated signaling pathway (GO:0009863)	14	9	1.75	+	5.14	0.000456	0.0139
cellular response to hypoxia (GO:0071456)	67	43	8.38	+	5.13	4.4e-15	1.13e-12
cellular response to decreased oxygen levels (GO:0036294)	67	43	8.38	+	5.13	4.4e-15	1.05e-12
cellular response to salicylic acid stimulus (GO:0071446)	18	11	2.25	+	4.88	0.000146	0.00559
regulation of cell death (GO:0010941)	19	11	2.38	+	4.63	0.000208	0.00737
auxin metabolic process (GO:0009850)	14	8	1.75	+	4.57	0.00167	0.0404
toxin metabolic process (GO:0009404)	29	16	3.63	+	4.41	1.16e-05	0.000614
response to oxygen levels (GO:0070482)	83	45	10.38	+	4.33	9.59e-14	1.88e-11
immune system process (GO:0002376)	74	40	9.26	+	4.32	2.92e-12	4.63e-10
response to hypoxia (GO:0001666)	82	44	10.26	+	4.29	2.48e-13	4.59e-11
immune response (GO:0006955)	41	22	5.13	+	4.29	3.57e-07	2.38e-05
response to decreased oxygen levels (GO:0036293)	82	44	10.26	+	4.29	2.48e-13	4.35e-11
S-glycoside biosynthetic process (GO:0016144)	17	9	2.13	+	4.23	0.00129	0.0336
glucosinolate biosynthetic process (GO:0019761)	17	9	2.13	+	4.23	0.00129	0.0333
glycosinolate biosynthetic process (GO:0019758)	17	9	2.13	+	4.23	0.00129	0.033
innate immune response (GO:0045087)	38	20	4.75	+	4.21	1.57e-06	9.7e-05
response to molecule of bacterial origin (GO:0002237)	19	10	2.38	+	4.21	0.000717	0.0206
glycosyl compound biosynthetic process (GO:1901659)	20	10	2.5	+	4	0.000972	0.0257
response to salicylic acid (GO:0009751)	51	25	6.38	+	3.92	2.08e-07	1.48e-05
regulation of defense response (GO:0031347)	92	43	11.51	+	3.74	1.74e-11	2.41e-09
response to organonitrogen compound (GO:0010243)	60	28	7.51	+	3.73	8.32e-08	6.76e-06
defense response to bacterium (GO:0042742)	147	66	18.39	+	3.59	8.9e-17	2.97e-14
response to fungus (GO:0009620)	151	66	18.89	+	3.49	2.62e-16	7.94e-14
defense response to fungus (GO:0050832)	113	49	14.14	+	3.47	4.78e-12	7.24e-10
regulation of response to stress (GO:0080134)	111	46	13.89	+	3.31	8.25e-11	1.06e-08
response to jasmonic acid (GO:0009753)	97	40	12.14	+	3.3	1.88e-09	1.84e-07
response to bacterium (GO:0009617)	188	76	23.52	+	3.23	2.59e-17	9.6e-15
response to fatty acid (GO:0070542)	99	40	12.39	+	3.23	3.03e-09	2.88e-07
regulation of response to biotic stimulus (GO:0002831)	30	12	3.75	+	3.2	0.00144	0.0359
regulation of response to external stimulus (GO:0032101)	31	12	3.88	+	3.09	0.00181	0.0433
cellular response to organic cyclic compound (GO:0071407)	43	16	5.38	+	2.97	0.000458	0.0139
response to nitrogen compound (GO:1901698)	78	29	9.76	+	2.97	2.19e-06	0.000132
response to organic cyclic compound (GO:0014070)	122	45	15.26	+	2.95	4.25e-09	3.94e-07
S-glycoside metabolic process (GO:0016143)	49	18	6.13	+	2.94	0.00023	0.00798
glucosinolate metabolic process (GO:0019760)	49	18	6.13	+	2.94	0.00023	0.0079
glycosinolate metabolic process (GO:0019757)	49	18	6.13	+	2.94	0.00023	0.00782
defense response to other organism (GO:0098542)	281	100	35.16	+	2.84	9.02e-20	3.76e-17
glycosyl compound metabolic process (GO:1901657)	57	20	7.13	+	2.8	0.00027	0.00909
response to other organism (GO:0051707)	363	127	45.41	+	2.8	5.75e-26	1.92e-22
response to external biotic stimulus (GO:0043207)	363	127	45.41	+	2.8	5.75e-26	9.58e-23
response to biotic stimulus (GO:0009607)	364	127	45.54	+	2.79	6.89e-26	7.65e-23
biological process involved in interspecies interaction between organisms (GO:0044419)	365	127	45.67	+	2.78	8.34e-26	6.95e-23
response to wounding (GO:0009611)	161	56	20.14	+	2.78	2.15e-10	2.65e-08
defense response (GO:0006952)	317	108	39.66	+	2.72	1.6e-20	7.61e-18
secondary metabolite biosynthetic process (GO:0044550)	53	18	6.63	+	2.71	0.000707	0.0205
secondary metabolic process (GO:0019748)	132	44	16.51	+	2.66	6.51e-08	5.71e-06
cellular response to stress (GO:0033554)	220	67	27.52	+	2.43	2.27e-10	2.7e-08
response to external stimulus (GO:0009605)	447	136	55.92	+	2.43	4.67e-23	3.11e-20
cellular response to chemical stimulus (GO:0070887)	309	93	38.66	+	2.41	2.19e-14	4.86e-12
sulfur compound biosynthetic process (GO:0044272)	67	20	8.38	+	2.39	0.00133	0.0336
regulation of response to stimulus (GO:0048583)	179	53	22.39	+	2.37	7.05e-08	6.02e-06
alpha-amino acid metabolic process (GO:1901605)	112	31	14.01	+	2.21	0.000165	0.00611
cellular response to endogenous stimulus (GO:0071495)	159	43	19.89	+	2.16	1.14e-05	0.000613
cellular response to hormone stimulus (GO:0032870)	157	42	19.64	+	2.14	1.78e-05	0.000874
cellular response to oxygen-containing compound (GO:1901701)	164	43	20.52	+	2.1	2.42e-05	0.00114
response to alcohol (GO:0097305)	173	45	21.64	+	2.08	1.51e-05	0.000761
response to abscisic acid (GO:0009737)	160	41	20.02	+	2.05	5.65e-05	0.00238
sulfur compound metabolic process (GO:0006790)	133	34	16.64	+	2.04	0.000298	0.00973
response to acid chemical (GO:0001101)	185	47	23.15	+	2.03	2.37e-05	0.00113
response to water (GO:0009415)	183	46	22.9	+	2.01	3.5e-05	0.00157
hormone-mediated signaling pathway (GO:0009755)	124	31	15.51	+	2	0.00083	0.0232
response to lipid (GO:0033993)	288	72	36.03	+	2	9.89e-08	7.85e-06
cellular response to organic substance (GO:0071310)	197	49	24.65	+	1.99	2.43e-05	0.00112
response to water deprivation (GO:0009414)	174	43	21.77	+	1.98	9.91e-05	0.00398
response to osmotic stress (GO:0006970)	155	38	19.39	+	1.96	0.000292	0.00964
response to endogenous stimulus (GO:0009719)	347	82	43.41	+	1.89	7.67e-08	6.39e-06
cellular response to stimulus (GO:0051716)	489	115	61.18	+	1.88	2.21e-11	2.94e-09
response to hormone (GO:0009725)	345	81	43.16	+	1.88	1.15e-07	8.87e-06
response to oxidative stress (GO:0006979)	155	36	19.39	+	1.86	0.00108	0.0284
response to stress (GO:0006950)	819	189	102.46	+	1.84	1.89e-22	1.05e-19
response to organic substance (GO:0010033)	475	109	59.43	+	1.83	4.73e-10	5.25e-08
response to oxygen-containing compound (GO:1901700)	484	111	60.55	+	1.83	2.41e-10	2.77e-08
signaling (GO:0023052)	252	55	31.53	+	1.74	0.000143	0.00552
signal transduction (GO:0007165)	247	53	30.9	+	1.72	0.000275	0.00918
response to chemical (GO:0042221)	775	163	96.96	+	1.68	7.77e-14	1.62e-11
cell communication (GO:0007154)	290	59	36.28	+	1.63	0.000459	0.0138
oxoacid metabolic process (GO:0043436)	415	80	51.92	+	1.54	0.000127	0.00505
organic acid metabolic process (GO:0006082)	430	82	53.8	+	1.52	0.000152	0.00568
response to inorganic substance (GO:0010035)	385	71	48.17	+	1.47	0.00131	0.0333
small molecule metabolic process (GO:0044281)	547	95	68.44	+	1.39	0.000835	0.0232
response to abiotic stimulus (GO:0009628)	716	124	89.58	+	1.38	7.34e-05	0.00302
response to stimulus (GO:0050896)	1280	221	160.14	+	1.38	1.29e-12	2.16e-10
biological regulation (GO:0065007)	756	122	94.58	+	1.29	0.00147	0.0363
protein metabolic process (GO:0019538)	487	36	60.93	-	0.59	0.000425	0.0133
macromolecule metabolic process (GO:0043170)	639	45	79.95	-	0.56	4.89e-06	0.000291
cellular component biogenesis (GO:0044085)	256	14	32.03	-	0.44	0.000658	0.0194
cellular amide metabolic process (GO:0043603)	259	11	32.4	-	0.34	2.26e-05	0.00109
organelle organization (GO:0006996)	190	8	23.77	-	0.34	0.000369	0.0117
generation of precursor metabolites and energy (GO:0006091)	145	6	18.14	-	0.33	0.00201	0.0478
nucleobase-containing compound metabolic process (GO:0006139)	220	9	27.52	-	0.33	9.46e-05	0.00385
peptide metabolic process (GO:0006518)	228	9	28.53	-	0.32	4.76e-05	0.00203
cellular macromolecule metabolic process (GO:0044260)	363	14	45.41	-	0.31	6.48e-08	5.83e-06
cellular macromolecule biosynthetic process (GO:0034645)	250	9	31.28	-	0.29	5.5e-06	0.000322
amide biosynthetic process (GO:0043604)	233	8	29.15	-	0.27	7.65e-06	0.000432
macromolecule biosynthetic process (GO:0009059)	264	9	33.03	-	0.27	1.26e-06	7.92e-05
peptide biosynthetic process (GO:0043043)	214	7	26.77	-	0.26	1.54e-05	0.000764
translation (GO:0006412)	211	5	26.4	-	0.19	1.21e-06	7.75e-05
gene expression (GO:0010467)	288	6	36.03	-	0.17	1.36e-09	1.37e-07
nucleic acid metabolic process (GO:0090304)	119	2	14.89	-	0.13	0.000146	0.00552
macromolecule catabolic process (GO:0009057)	138	2	17.27	-	0.12	1.23e-05	0.000638
proteolysis involved in protein catabolic process (GO:0051603)	84	1	10.51	-	0.1	0.000702	0.0205
protein catabolic process (GO:0030163)	99	1	12.39	-	0.08	0.000135	0.00531
RNA metabolic process (GO:0016070)	108	1	13.51	-	0.07	6.07e-05	0.00253

## Sheet: 8 hours downregulated
Analysis Type:	PANTHER Overrepresentation Test (Released 20221013)
Annotation Version and Release Date:	GO Ontology database DOI: 10.5281/zenodo.6799722 Released 2022-07-01
Analyzed List:	8 Hours Downregulated (Arabidopsis thaliana)
Reference List:	8 Hours Reference List (Arabidopsis thaliana)
Test Type:	FISHER
Correction:	FDR
GO biological process complete	REFLIST (2679)	Input (447)	expected	over/under	Fold Enrichment	raw P-value	FDR
photosynthesis (GO:0015979)	92	46	15.35	+	3	5.87e-09	6.86e-06
photosynthesis, light reaction (GO:0019684)	63	31	10.51	+	2.95	2.95e-06	0.000493
porphyrin-containing compound metabolic process (GO:0006778)	81	35	13.52	+	2.59	8.38e-06	0.00101
tetrapyrrole metabolic process (GO:0033013)	88	37	14.68	+	2.52	5.82e-06	0.000729
chlorophyll metabolic process (GO:0015994)	55	22	9.18	+	2.4	0.000845	0.0478
response to radiation (GO:0009314)	370	103	61.74	+	1.67	1.53e-06	0.000269
cellular component biogenesis (GO:0044085)	253	70	42.21	+	1.66	0.000145	0.0111
response to light stimulus (GO:0009416)	368	101	61.4	+	1.64	4.03e-06	0.000565
biological regulation (GO:0065007)	977	121	163.02	-	0.74	0.000113	0.00898
regulation of biological process (GO:0050789)	879	107	146.66	-	0.73	0.000179	0.0131
regulation of cellular process (GO:0050794)	740	88	123.47	-	0.71	0.000401	0.0265
response to external stimulus (GO:0009605)	625	67	104.28	-	0.64	5.99e-05	0.00526
organic substance catabolic process (GO:1901575)	374	37	62.4	-	0.59	0.000653	0.0376
catabolic process (GO:0009056)	443	41	73.92	-	0.55	3.83e-05	0.00363
defense response (GO:0006952)	468	42	78.09	-	0.54	8.61e-06	0.000975
biological process involved in interspecies interaction between organisms (GO:0044419)	528	47	88.1	-	0.53	1.29e-06	0.000238
cellular response to stimulus (GO:0051716)	693	61	115.63	-	0.53	5.52e-09	9.67e-06
response to other organism (GO:0051707)	525	46	87.6	-	0.53	8.55e-07	0.000231
response to external biotic stimulus (GO:0043207)	525	46	87.6	-	0.53	8.55e-07	0.000214
response to biotic stimulus (GO:0009607)	526	46	87.76	-	0.52	8.62e-07	0.000201
defense response to other organism (GO:0098542)	419	36	69.91	-	0.51	1.22e-05	0.00129
cellular catabolic process (GO:0044248)	365	31	60.9	-	0.51	4.19e-05	0.00387
cell communication (GO:0007154)	429	36	71.58	-	0.5	3.89e-06	0.000569
cellular response to hormone stimulus (GO:0032870)	212	16	35.37	-	0.45	0.000556	0.033
cellular response to oxygen-containing compound (GO:1901701)	227	17	37.88	-	0.45	0.000382	0.0258
cellular response to endogenous stimulus (GO:0071495)	216	16	36.04	-	0.44	0.000415	0.0264
cellular localization (GO:0051641)	217	16	36.21	-	0.44	0.000417	0.0261
signaling (GO:0023052)	380	28	63.4	-	0.44	9.94e-07	0.000218
signal transduction (GO:0007165)	376	27	62.74	-	0.43	5.94e-07	0.000174
cellular response to chemical stimulus (GO:0070887)	446	32	74.42	-	0.43	3.53e-08	2.48e-05
defense response to fungus (GO:0050832)	187	13	31.2	-	0.42	0.000534	0.0323
regulation of response to stimulus (GO:0048583)	275	19	45.88	-	0.41	1.56e-05	0.00157
cellular response to stress (GO:0033554)	301	20	50.22	-	0.4	2.97e-06	0.000474
response to fungus (GO:0009620)	245	16	40.88	-	0.39	2.7e-05	0.00263
macromolecule localization (GO:0033036)	200	13	33.37	-	0.39	0.000156	0.0116
cellular response to organic substance (GO:0071310)	280	18	46.72	-	0.39	4.82e-06	0.000626
protein modification process (GO:0036211)	244	15	40.71	-	0.37	1.08e-05	0.00119
macromolecule modification (GO:0043412)	254	15	42.38	-	0.35	4.05e-06	0.000547
phosphorylation (GO:0016310)	155	9	25.86	-	0.35	0.00035	0.024
response to bacterium (GO:0009617)	304	17	50.72	-	0.34	1.24e-07	5.46e-05
cellular macromolecule localization (GO:0070727)	164	9	27.36	-	0.33	0.00013	0.0101
defense response to bacterium (GO:0042742)	256	14	42.71	-	0.33	1.06e-06	0.000219
proteolysis (GO:0006508)	135	7	22.53	-	0.31	0.0005	0.0307
regulation of response to stress (GO:0080134)	191	9	31.87	-	0.28	8.42e-06	0.000984
response to organonitrogen compound (GO:0010243)	119	5	19.86	-	0.25	0.000325	0.0233
protein catabolic process (GO:0030163)	119	5	19.86	-	0.25	0.000325	0.0228
proteolysis involved in protein catabolic process (GO:0051603)	102	4	17.02	-	0.24	0.000588	0.0344
cellular macromolecule catabolic process (GO:0044265)	104	4	17.35	-	0.23	0.000408	0.0265
regulation of defense response (GO:0031347)	167	6	27.86	-	0.22	2.99e-06	0.000456
protein phosphorylation (GO:0006468)	119	4	19.86	-	0.2	6.28e-05	0.00537
response to decreased oxygen levels (GO:0036293)	146	2	24.36	-	0.08	4.59e-08	2.69e-05
response to oxygen levels (GO:0070482)	147	2	24.53	-	0.08	4.85e-08	2.43e-05
modification-dependent macromolecule catabolic process (GO:0043632)	81	1	13.52	-	0.07	7.72e-05	0.00645
modification-dependent protein catabolic process (GO:0019941)	81	1	13.52	-	0.07	7.72e-05	0.0063
response to salicylic acid (GO:0009751)	110	1	18.35	-	0.05	1.14e-06	0.000222
cellular response to decreased oxygen levels (GO:0036294)	121	1	20.19	-	0.05	1.99e-07	6.96e-05
cellular response to oxygen levels (GO:0071453)	122	1	20.36	-	0.05	1.25e-07	4.87e-05
response to hypoxia (GO:0001666)	145	1	24.19	-	0.04	3.73e-09	1.31e-05
ubiquitin-dependent protein catabolic process (GO:0006511)	76	0	12.68	-	< 0.01	1.49e-05	0.00153
cellular response to hypoxia (GO:0071456)	120	0	20.02	-	< 0.01	1.13e-08	9.89e-06
response to chitin (GO:0010200)	66	0	11.01	-	< 0.01	5.26e-05	0.00473
vesicle-mediated transport (GO:0016192)	96	0	16.02	-	< 0.01	4.04e-07	0.000129

## Sheet: 8 hours upregulated
Analysis Type:	PANTHER Overrepresentation Test (Released 20221013)
Annotation Version and Release Date:	GO Ontology database DOI: 10.5281/zenodo.6799722 Released 2022-07-01
Analyzed List:	8 Hours Upregulated (Arabidopsis thaliana)
Reference List:	8 Hours Reference List (Arabidopsis thaliana)
Test Type:	FISHER
Correction:	FDR
GO biological process complete	REFLIST (2679)	Input (661)	expected	over/under	Fold Enrichment	raw P-value	FDR
benzene-containing compound metabolic process (GO:0042537)	16	15	3.95	+	3.8	0.000302	0.00868
response to chitin (GO:0010200)	66	61	16.28	+	3.75	2.41e-13	2.07e-11
defense response to oomycetes (GO:0002229)	13	12	3.21	+	3.74	0.00134	0.0331
indolalkylamine metabolic process (GO:0006586)	16	14	3.95	+	3.55	0.000762	0.0203
tryptophan metabolic process (GO:0006568)	16	14	3.95	+	3.55	0.000762	0.0201
cellular response to hypoxia (GO:0071456)	120	104	29.61	+	3.51	9.41e-21	1.5e-18
induced systemic resistance (GO:0009682)	15	13	3.7	+	3.51	0.00125	0.0315
cellular response to oxygen levels (GO:0071453)	122	105	30.1	+	3.49	7.22e-21	1.21e-18
cellular response to decreased oxygen levels (GO:0036294)	121	104	29.85	+	3.48	1.21e-20	1.85e-18
response to oomycetes (GO:0002239)	27	23	6.66	+	3.45	3.64e-05	0.00126
cellular response to salicylic acid stimulus (GO:0071446)	35	29	8.64	+	3.36	3.28e-06	0.000132
response to molecule of bacterial origin (GO:0002237)	37	30	9.13	+	3.29	2.74e-06	0.000114
response to hypoxia (GO:0001666)	145	116	35.78	+	3.24	2.64e-21	5.15e-19
response to oxygen levels (GO:0070482)	147	117	36.27	+	3.23	2.14e-21	4.41e-19
response to decreased oxygen levels (GO:0036293)	146	116	36.02	+	3.22	3.61e-21	6.67e-19
regulation of immune system process (GO:0002682)	46	36	11.35	+	3.17	6.61e-07	3.05e-05
response to salicylic acid (GO:0009751)	110	86	27.14	+	3.17	2.77e-15	2.86e-13
salicylic acid mediated signaling pathway (GO:0009863)	26	20	6.42	+	3.12	0.000232	0.00697
positive regulation of defense response (GO:0031349)	25	19	6.17	+	3.08	0.000372	0.0104
toxin metabolic process (GO:0009404)	49	37	12.09	+	3.06	6.43e-07	3.01e-05
indole-containing compound biosynthetic process (GO:0042435)	36	27	8.88	+	3.04	3.44e-05	0.00121
indole-containing compound metabolic process (GO:0042430)	64	48	15.79	+	3.04	1.73e-08	9.92e-07
regulation of defense response (GO:0031347)	167	123	41.2	+	2.99	1.77e-20	2.58e-18
response to organonitrogen compound (GO:0010243)	119	87	29.36	+	2.96	2.15e-14	1.99e-12
cellular biogenic amine metabolic process (GO:0006576)	22	16	5.43	+	2.95	0.00152	0.0362
cellular amine metabolic process (GO:0044106)	22	16	5.43	+	2.95	0.00152	0.036
immune system process (GO:0002376)	128	93	31.58	+	2.94	3.55e-15	3.46e-13
aromatic amino acid family metabolic process (GO:0009072)	35	25	8.64	+	2.89	0.0001	0.00311
regulation of response to stress (GO:0080134)	191	134	47.13	+	2.84	5.85e-21	1.03e-18
systemic acquired resistance (GO:0009627)	36	25	8.88	+	2.81	0.000124	0.00378
immune response (GO:0006955)	61	42	15.05	+	2.79	8.54e-07	3.84e-05
regulation of cell death (GO:0010941)	32	22	7.9	+	2.79	0.000386	0.0106
innate immune response (GO:0045087)	56	38	13.82	+	2.75	4.3e-06	0.000169
response to nitrogen compound (GO:1901698)	144	96	35.53	+	2.7	5.62e-14	5.06e-12
response to fungus (GO:0009620)	245	162	60.45	+	2.68	1.08e-23	2.53e-21
defense response to bacterium (GO:0042742)	256	169	63.16	+	2.68	1.02e-24	2.55e-22
defense response to fungus (GO:0050832)	187	121	46.14	+	2.62	8.27e-17	9.36e-15
regulation of response to biotic stimulus (GO:0002831)	45	29	11.1	+	2.61	9.07e-05	0.00284
regulation of response to external stimulus (GO:0032101)	47	30	11.6	+	2.59	0.000114	0.00351
plant organ senescence (GO:0090693)	58	37	14.31	+	2.59	1.1e-05	0.000411
leaf senescence (GO:0010150)	55	35	13.57	+	2.58	2.13e-05	0.000777
response to bacterium (GO:0009617)	304	190	75.01	+	2.53	5.63e-26	1.52e-23
response to organic cyclic compound (GO:0014070)	192	118	47.37	+	2.49	3.31e-15	3.32e-13
response to wounding (GO:0009611)	192	111	47.37	+	2.34	7.28e-13	5.94e-11
defense response to other organism (GO:0098542)	419	241	103.38	+	2.33	5.57e-30	2.44e-27
cellular response to organic cyclic compound (GO:0071407)	68	39	16.78	+	2.32	5.76e-05	0.0019
regulation of response to stimulus (GO:0048583)	275	155	67.85	+	2.28	2.64e-17	3.09e-15
response to jasmonic acid (GO:0009753)	114	64	28.13	+	2.28	2.02e-07	1.04e-05
cellular response to stress (GO:0033554)	301	168	74.27	+	2.26	9.61e-19	1.3e-16
defense response (GO:0006952)	468	261	115.47	+	2.26	2.28e-31	1.14e-28
positive regulation of response to stimulus (GO:0048584)	54	30	13.32	+	2.25	0.000704	0.0189
response to biotic stimulus (GO:0009607)	526	291	129.78	+	2.24	1.54e-35	2.69e-32
response to other organism (GO:0051707)	525	290	129.54	+	2.24	2.61e-35	3.06e-32
response to external biotic stimulus (GO:0043207)	525	290	129.54	+	2.24	2.61e-35	2.29e-32
response to fatty acid (GO:0070542)	116	64	28.62	+	2.24	3.71e-07	1.83e-05
biological process involved in interspecies interaction between organisms (GO:0044419)	528	290	130.28	+	2.23	6.35e-35	4.45e-32
cellular response to chemical stimulus (GO:0070887)	446	241	110.04	+	2.19	8.13e-27	2.38e-24
response to abscisic acid (GO:0009737)	224	118	55.27	+	2.14	1.35e-11	9.31e-10
response to alcohol (GO:0097305)	245	127	60.45	+	2.1	4.15e-12	2.91e-10
response to external stimulus (GO:0009605)	625	316	154.21	+	2.05	1.35e-33	7.86e-31
cellular response to organic substance (GO:0071310)	280	140	69.09	+	2.03	2.02e-12	1.54e-10
cellular response to endogenous stimulus (GO:0071495)	216	108	53.29	+	2.03	1.18e-09	7.4e-08
secondary metabolic process (GO:0019748)	178	89	43.92	+	2.03	5.52e-08	2.98e-06
cellular response to hormone stimulus (GO:0032870)	212	105	52.31	+	2.01	3.28e-09	1.95e-07
response to acid chemical (GO:0001101)	237	117	58.48	+	2	5.13e-10	3.33e-08
response to water (GO:0009415)	234	115	57.74	+	1.99	6.82e-10	4.35e-08
response to water deprivation (GO:0009414)	222	109	54.77	+	1.99	2.56e-09	1.55e-07
protein phosphorylation (GO:0006468)	119	57	29.36	+	1.94	5.59e-05	0.00187
response to oxidative stress (GO:0006979)	199	95	49.1	+	1.93	9.27e-08	4.85e-06
hormone-mediated signaling pathway (GO:0009755)	168	80	41.45	+	1.93	1.25e-06	5.4e-05
cellular response to oxygen-containing compound (GO:1901701)	227	107	56.01	+	1.91	1.89e-08	1.07e-06
cellular response to stimulus (GO:0051716)	693	317	170.99	+	1.85	7.55e-27	2.41e-24
response to lipid (GO:0033993)	369	168	91.04	+	1.85	3.04e-12	2.22e-10
signaling (GO:0023052)	380	173	93.76	+	1.85	1.44e-12	1.12e-10
signal transduction (GO:0007165)	376	170	92.77	+	1.83	4.02e-12	2.88e-10
response to organic substance (GO:0010033)	620	275	152.97	+	1.8	1.93e-20	2.71e-18
response to endogenous stimulus (GO:0009719)	441	195	108.81	+	1.79	2.63e-13	2.19e-11
response to hormone (GO:0009725)	437	192	107.82	+	1.78	7.32e-13	5.83e-11
cell communication (GO:0007154)	429	187	105.85	+	1.77	2.62e-12	1.95e-10
response to osmotic stress (GO:0006970)	203	88	50.09	+	1.76	9.72e-06	0.000367
response to stress (GO:0006950)	1052	455	259.56	+	1.75	9.41e-43	3.3e-39
response to oxygen-containing compound (GO:1901700)	624	266	153.96	+	1.73	1.54e-17	1.86e-15
response to salt stress (GO:0009651)	156	65	38.49	+	1.69	0.000436	0.0119
response to chemical (GO:0042221)	981	396	242.05	+	1.64	4.01e-27	1.41e-24
phosphorylation (GO:0016310)	155	62	38.24	+	1.62	0.00143	0.0345
response to inorganic substance (GO:0010035)	472	181	116.46	+	1.55	3.86e-08	2.12e-06
regulation of cellular process (GO:0050794)	740	255	182.58	+	1.4	7.36e-08	3.91e-06
regulation of biological process (GO:0050789)	879	299	216.88	+	1.38	4.06e-09	2.37e-07
response to stimulus (GO:0050896)	1598	542	394.28	+	1.37	5.76e-29	2.25e-26
response to abiotic stimulus (GO:0009628)	871	292	214.91	+	1.36	3.18e-08	1.77e-06
biological regulation (GO:0065007)	977	327	241.06	+	1.36	1.27e-09	7.83e-08
primary metabolic process (GO:0044238)	1172	223	289.17	-	0.77	2.93e-06	0.000121
cellular biosynthetic process (GO:0044249)	629	113	155.2	-	0.73	0.000373	0.0104
biosynthetic process (GO:0009058)	702	123	173.21	-	0.71	4.37e-05	0.0015
protein metabolic process (GO:0019538)	551	96	135.95	-	0.71	0.000348	0.00985
cellular nitrogen compound metabolic process (GO:0034641)	540	89	133.24	-	0.67	6.1e-05	0.00198
macromolecule metabolic process (GO:0043170)	710	117	175.18	-	0.67	1.66e-06	7e-05
organic substance biosynthetic process (GO:1901576)	665	105	164.08	-	0.64	5.32e-07	2.56e-05
reproductive process (GO:0022414)	273	41	67.36	-	0.61	0.00133	0.0331
post-embryonic development (GO:0009791)	269	40	66.37	-	0.6	0.00122	0.0311
reproduction (GO:0000003)	276	41	68.1	-	0.6	0.00107	0.0273
response to light stimulus (GO:0009416)	368	54	90.8	-	0.59	6.46e-05	0.00204
response to radiation (GO:0009314)	370	54	91.29	-	0.59	6.46e-05	0.00206
cellular component organization (GO:0016043)	372	53	91.78	-	0.58	2.83e-05	0.00101
organonitrogen compound biosynthetic process (GO:1901566)	405	57	99.93	-	0.57	7.33e-06	0.000282
developmental process involved in reproduction (GO:0003006)	250	35	61.68	-	0.57	0.000601	0.0162
cellular component organization or biogenesis (GO:0071840)	462	63	113.99	-	0.55	3.59e-07	1.8e-05
reproductive system development (GO:0061458)	225	29	55.52	-	0.52	0.000295	0.00861
reproductive structure development (GO:0048608)	225	29	55.52	-	0.52	0.000295	0.00854
cellular nitrogen compound biosynthetic process (GO:0044271)	351	45	86.6	-	0.52	3.13e-06	0.000127
macromolecule catabolic process (GO:0009057)	161	20	39.72	-	0.5	0.00201	0.0467
fruit development (GO:0010154)	157	19	38.74	-	0.49	0.0013	0.0327
seed development (GO:0048316)	151	18	37.26	-	0.48	0.00145	0.0349
cellular component biogenesis (GO:0044085)	253	26	62.42	-	0.42	9.57e-07	4.2e-05
proteolysis (GO:0006508)	135	13	33.31	-	0.39	0.000293	0.00864
embryo development (GO:0009790)	119	11	29.36	-	0.37	0.000452	0.0123
nucleobase-containing compound metabolic process (GO:0006139)	221	20	54.53	-	0.37	5.64e-07	2.67e-05
cellular component assembly (GO:0022607)	147	13	36.27	-	0.36	5.98e-05	0.00196
intracellular protein transport (GO:0006886)	93	8	22.95	-	0.35	0.00137	0.0334
organelle organization (GO:0006996)	215	18	53.05	-	0.34	2.23e-07	1.13e-05
protein-containing complex assembly (GO:0065003)	111	9	27.39	-	0.33	0.000251	0.00746
intracellular transport (GO:0046907)	127	10	31.34	-	0.32	6.43e-05	0.00207
cellular macromolecule metabolic process (GO:0044260)	368	28	90.8	-	0.31	1.14e-13	9.99e-12
establishment of localization in cell (GO:0051649)	133	10	32.82	-	0.3	2.23e-05	0.000806
protein-containing complex organization (GO:0043933)	123	9	30.35	-	0.3	4.6e-05	0.00157
ribonucleotide metabolic process (GO:0009259)	71	5	17.52	-	0.29	0.00196	0.0459
generation of precursor metabolites and energy (GO:0006091)	160	11	39.48	-	0.28	9.21e-07	4.09e-05
organophosphate biosynthetic process (GO:0090407)	65	4	16.04	-	0.25	0.0019	0.0448
cellular amide metabolic process (GO:0043603)	246	15	60.7	-	0.25	4.22e-11	2.85e-09
nucleic acid metabolic process (GO:0090304)	110	6	27.14	-	0.22	8.08e-06	0.000308
peptide metabolic process (GO:0006518)	214	11	52.8	-	0.21	5.8e-11	3.84e-09
RNA metabolic process (GO:0016070)	98	3	24.18	-	0.12	7.43e-07	3.38e-05
RNA processing (GO:0006396)	68	2	16.78	-	0.12	5.13e-05	0.00173
amide biosynthetic process (GO:0043604)	214	6	52.8	-	0.11	1.46e-14	1.38e-12
cellular macromolecule biosynthetic process (GO:0034645)	232	6	57.24	-	0.1	2.52e-16	2.76e-14
macromolecule biosynthetic process (GO:0009059)	247	6	60.94	-	0.1	1.02e-17	1.28e-15
photosynthesis (GO:0015979)	92	2	22.7	-	0.09	4.87e-07	2.37e-05
ncRNA metabolic process (GO:0034660)	53	1	13.08	-	0.08	0.000185	0.00559
ribosome biogenesis (GO:0042254)	63	1	15.54	-	0.06	2.01e-05	0.000741
peptide biosynthetic process (GO:0043043)	194	3	47.87	-	0.06	1.51e-15	1.61e-13
ribonucleoprotein complex biogenesis (GO:0022613)	69	1	17.02	-	0.06	5.27e-06	0.000205
plastid organization (GO:0009657)	71	1	17.52	-	0.06	3.37e-06	0.000134
gene expression (GO:0010467)	263	3	64.89	-	0.05	2.16e-22	4.74e-20
translation (GO:0006412)	191	1	47.13	-	0.02	6.97e-18	9.05e-16
purine ribonucleotide biosynthetic process (GO:0009152)	33	0	8.14	-	< 0.01	0.00137	0.0335
electron transport chain (GO:0022900)	38	0	9.38	-	< 0.01	0.000325	0.00926
chloroplast organization (GO:0009658)	48	0	11.84	-	< 0.01	3.25e-05	0.00115
rRNA processing (GO:0006364)	34	0	8.39	-	< 0.01	0.000817	0.0214
rRNA metabolic process (GO:0016072)	34	0	8.39	-	< 0.01	0.000817	0.0212
ribonucleotide biosynthetic process (GO:0009260)	34	0	8.39	-	< 0.01	0.000817	0.0211
photosynthesis, light reaction (GO:0019684)	63	0	15.54	-	< 0.01	1.27e-06	5.43e-05

## Sheet: 2 Hours Reference List
AT5G53450
AT4G22710
AT5G13740
AT3G18290
AT2G19800
AT5G27420
AT5G05250
AT2G24850
AT1G27730
AT3G50930
AT4G16370
AT3G44860
AT3G52400
AT2G40140
AT3G14050
AT1G19670
AT5G67370
AT1G20510
AT1G80840
AT3G59220
AT2G38470
AT5G61900
AT5G44130
AT1G32640
AT2G26530
AT3G45640
AT4G39950
AT3G55980
AT1G23020
AT5G67330
AT5G02230
AT3G56360
AT2G42750
AT5G47910
AT3G25760
AT5G05730
AT2G30600
AT3G30775
AT4G34150
AT1G08920
AT1G74100
AT5G19240
AT5G61160
AT5G06320
AT5G01810
AT4G12720
AT1G77330
AT5G01600
AT4G39660
AT3G06850
AT1G55450
AT2G22330
AT3G19930
AT3G27060
AT1G72900
AT4G12480
AT1G19180
AT4G15610
AT5G47220
AT1G61820
AT4G27730
AT5G08790
AT5G22920
AT3G44720
AT5G20250
AT4G39940
AT1G51760
AT3G23550
AT5G42050
AT5G64100
AT1G03870
AT5G54810
AT4G17230
AT1G25220
AT5G55050
AT2G10940
AT1G72610
AT2G14170
AT5G57220
AT4G16980
AT1G73500
AT4G12420
AT1G20840
AT3G28930
AT1G18270
AT2G01530
AT1G11260
AT1G09070
AT4G36500
AT5G45110
AT1G13210
AT2G13790
AT4G17500
AT5G35735
AT2G23810
AT3G11820
AT1G73080
AT5G13220
AT1G21120
AT1G75750
AT5G66210
AT1G53440
AT4G23600
AT3G17770
AT4G35630
AT1G62480
AT1G80300
AT2G06050
AT4G12730
AT1G67480
AT2G45180
AT4G31500
AT1G57990
AT4G22690
AT1G33110
AT4G24350
AT4G30210
AT3G52870
AT1G15040
AT1G48300
AT1G18570
AT2G23600
AT3G12740
AT5G16010
AT5G52882
AT3G62010
AT4G13250
AT3G16530
AT4G30280
AT5G04340
AT2G22500
AT1G06640
AT2G26560
AT1G27770
AT1G62660
AT5G04930
AT5G44020
AT2G36950
AT3G15356
AT1G55920
AT4G17900
AT5G02760
AT5G17380
AT1G03090
AT4G37390
AT3G25770
AT3G45140
AT4G01870
AT5G42650
AT2G18690
AT2G41100
AT2G20670
AT3G11700
AT4G16990
AT4G05120
AT4G36670
AT2G39570
AT3G13080
AT1G05560
AT1G17745
AT5G20230
AT2G23170
AT5G55930
AT5G15350
AT1G54010
AT2G40000
AT3G54640
AT1G04040
AT3G22890
AT5G18670
AT1G61890
AT1G76160
AT1G09970
AT3G02468
AT5G19110
AT4G04610
AT3G16240
AT3G54400
AT4G02380
AT1G02930
AT4G33050
AT2G35930
AT5G26260
AT4G21850
AT3G02470
AT3G19390
AT1G32460
AT2G36220
AT2G27830
AT5G39050
AT4G38540
AT3G46280
AT2G22170
AT2G25450
AT5G63600
AT5G51070
AT3G15850
AT2G01520
AT5G28770
AT5G47780
AT5G60920
AT1G22400
AT4G00360
AT4G08870
AT1G11310
AT3G45300
AT1G28380
AT2G02990
AT5G26030
AT1G49660
AT5G63790
AT2G22300
AT1G72150
AT4G39980
AT4G29900
AT3G23000
AT5G18170
AT1G70700
AT2G37130
AT1G73260
AT1G70850
AT5G64410
AT1G15125
AT4G12470
AT4G10840
AT1G60730
AT4G20830
AT3G47340
AT5G41080
AT5G03040
AT5G16910
AT5G58430
AT2G41410
AT5G27760
AT4G30530
AT4G32020
AT2G04400
AT5G26280
AT1G12090
AT1G02640
AT2G20610
AT2G43820
AT1G57680
AT4G37640
AT1G53910
AT3G44190
AT4G20260
AT5G56870
AT1G25230
AT3G19010
AT4G17870
AT3G61260
AT3G63380
AT1G22530
AT5G62680
AT5G39580
AT5G65430
AT1G65840
AT1G14870
AT5G45428
AT3G14067
AT2G14750
AT2G29450
AT4G04770
AT5G01820
AT1G19450
AT2G44670
AT1G76990
AT2G30140
AT4G11850
AT1G52400
AT1G04430
AT2G26080
AT3G18830
AT3G50950
AT3G52840
AT2G36310
AT3G19450
AT1G33600
AT1G78040
AT5G61210
AT1G59870
AT5G14920
AT3G12580
AT1G25400
AT4G21830
AT5G52640
AT2G38380
AT2G31880
AT3G57330
AT1G29670
AT1G72450
AT1G27950
AT5G62280
AT2G18160
AT2G19760
AT1G33590
AT5G49360
AT2G20920
AT1G01140
AT4G21870
AT1G58290
AT4G34710
AT2G38860
AT3G15630
AT5G17990
AT3G55430
AT2G41090
AT3G57520
AT3G23050
AT3G49940
AT3G13750
AT3G06500
AT3G48890
AT2G06850
AT4G22470
AT5G22500
AT5G27380
AT5G28840
AT3G09940
AT1G78460
AT1G69530
AT3G52500
AT5G15410
AT5G19770
AT5G61820
AT4G00710
AT5G43700
AT1G02920
AT1G19380
AT4G34200
AT5G43350
AT2G41560
AT3G54140
AT5G40780
AT1G21130
AT1G78370
AT1G78240
AT1G80460
AT4G32410
AT5G64260
AT2G36320
AT3G13110
AT3G61060
AT5G05440
AT5G22060
AT1G61360
AT5G47370
AT1G30820
AT5G59540
AT5G62360
AT3G28940
AT1G31580
AT3G25780
AT3G30390
AT5G44070
AT5G05170
AT1G29470
AT5G06860
AT1G53430
AT5G08130
AT3G61430
AT3G18820
AT5G06700
AT1G21400
AT1G71880
AT3G57020
AT5G51830
AT3G44310
AT2G38310
AT1G12780
AT1G20330
AT3G26520
AT4G02520
AT2G20630
AT5G14120
AT3G14240
AT5G67360
AT5G18130
AT2G30620
AT3G01472
AT3G15950
AT4G33150
AT3G13790
AT1G05850
AT5G54160
AT4G36220
AT4G36850
AT5G38430
AT1G18210
AT3G15210
AT4G17170
AT3G28180
AT1G15690
AT3G44880
AT1G74790
AT2G30860
AT2G39210
AT5G23820
AT5G43760
AT3G26740
AT5G23010
AT3G47250
AT2G22430
AT5G04720
AT1G01120
AT1G76680
AT3G52800
AT5G61590
AT3G11280
AT1G68520
AT1G58602
AT3G48360
AT3G02350
AT5G42530
AT5G20010
AT5G54960
AT1G21310
AT2G32150
AT1G45688
AT4G26080
AT5G26570
AT5G02480
AT3G29240
AT4G34180
AT3G51730
AT3G11780
AT4G38470
AT2G36460
AT5G49720
AT2G22125
AT1G70410
AT4G08920
AT4G17340
AT2G31750
AT1G34370
AT1G78380
AT1G01620
AT4G38550
AT2G42880
AT5G25265
AT1G17290
AT1G27130
AT1G06040
AT2G36830
AT4G37980
AT5G61790
AT5G17170
AT5G19440
AT4G34120
AT1G31420
AT4G24230
AT4G09150
AT5G48380
AT1G22410
AT1G03740
AT3G19710
AT5G55120
AT1G22280
AT4G39260
AT4G15233
AT1G33790
AT4G02500
AT3G25830
AT3G05880
AT1G03220
AT1G73330
AT1G22930
AT5G19780
AT5G44790
AT1G63500
AT3G15450
AT3G23820
AT1G75380
AT1G21830
AT4G37800
AT5G63160
AT4G21990
AT4G21790
AT4G36360
AT5G44380
AT5G59730
AT3G17240
AT2G24200
AT2G15620
AT2G03440
AT5G54390
AT1G60140
AT5G53550
AT1G49240
AT2G44490
AT1G21980
AT1G62180
AT5G63850
AT1G70940
AT2G37170
AT3G29320
AT5G11740
AT2G41700
AT4G40030
AT1G70160
AT4G18030
AT5G21170
AT1G37130
AT3G51600
AT1G25275
AT2G26740
AT3G16470
AT5G51820
AT4G15545
AT5G58350
AT2G47730
AT1G77120
AT1G55850
AT5G07440
AT3G54620
AT5G21105
AT1G20693
AT2G46800
AT4G24510
AT1G13360
AT3G25140
AT1G24160
AT1G51500
AT3G32980
AT1G61740
AT5G43830
AT1G14710
AT2G01850
AT5G55180
AT1G11670
AT3G23810
AT2G26250
AT2G15970
AT4G08950
AT4G34030
AT3G53260
AT3G60450
AT5G13710
AT1G07890
AT1G78000
AT2G40890
AT2G18700
AT4G03560
AT1G30720
AT2G31810
AT4G00730
AT2G30520
AT5G26340
AT5G49440
AT4G22240
AT1G28580
AT5G43060
AT3G13520
AT1G06760
AT5G40850
AT5G04740
AT1G10370
AT5G16970
AT3G09260
AT4G25050
AT3G48530
AT2G47070
AT2G27860
AT3G49220
AT2G21620
AT1G12110
AT5G65110
AT1G08930
AT3G25690
AT5G54940
AT2G38530
AT3G13870
AT5G53140
AT4G30190
AT4G35770
AT3G15353
AT1G68440
AT1G54130
AT2G01450
AT2G18710
AT3G25230
AT2G29630
AT1G66270
AT2G43910
AT4G35090
AT1G79340
AT3G16460
AT3G04730
AT3G03990
AT2G28900
AT1G66180
AT5G58330
AT3G63190
AT1G49600
AT1G09560
AT4G33300
AT1G79690
AT1G60780
AT3G17390
AT1G65220
AT4G33510
AT1G76080
AT5G52040
AT2G31360
AT1G75680
AT2G36120
AT1G29395
AT3G18080
AT1G56340
AT3G07390
AT4G21410
AT3G24170
AT3G02360
AT5G57560
AT3G16630
AT3G10720
AT2G40840
AT5G20700
AT5G52060
AT4G11320
AT1G50480
AT5G57655
AT5G62350
AT1G51680
AT3G48140
AT3G26060
AT2G04030
AT2G02710
AT5G09590
AT2G47590
AT3G54500
AT2G46600
AT3G27770
AT5G44580
AT3G62830
AT5G22630
AT2G45170
AT5G44340
AT5G03630
AT1G51805
AT1G03900
AT5G59950
AT4G08390
AT1G71010
AT3G13470
AT1G65390
AT1G76930
AT4G34350
AT4G35830
AT5G34850
AT4G16760
AT4G17090
AT4G28260
AT5G65630
AT3G16670
AT4G16490
AT4G27450
AT3G59060
AT5G14200
AT2G07050
AT3G14660
AT3G51840
AT4G30140
AT1G56280
AT1G51570
AT3G03150
AT4G36988
AT1G19570
AT1G22360
AT1G26850
AT4G31340
AT5G64250
AT2G02180
AT1G19660
AT3G13410
AT1G03130
AT1G68560
AT5G25460
AT2G38870
AT3G48730
AT1G79560
AT3G49120
AT4G12650
AT3G53710
AT4G13770
AT2G30490
AT1G66580
AT1G80440
AT1G22710
AT4G32150
AT1G43670
AT3G22200
AT2G13560
AT4G30920
AT4G02920
AT1G32050
AT3G21690
AT1G76670
AT1G78850
AT2G47650
AT4G31780
AT4G24960
AT5G57350
AT3G09740
AT2G39010
AT2G46500
AT3G50740
AT1G76790
AT3G08590
AT1G03080
AT4G33430
AT5G17230
AT1G20440
AT4G14030
AT3G57410
AT5G38420
AT5G48300
AT4G29350
AT4G20070
AT1G52200
AT4G32480
AT5G40450
AT4G21750
AT4G26970
AT3G12080
AT5G48385
AT5G16470
AT3G45980
AT4G36648
AT1G03475
AT3G59400
AT5G25100
AT4G22517
AT1G76490
AT2G28000
AT2G45300
AT5G53490
AT1G30360
AT4G16890
AT5G64120
AT5G43320
AT2G22660
AT5G28050
AT3G48870
AT3G05220
AT1G32990
AT2G44060
AT2G47390
AT4G22485
AT2G05440
AT3G52960
AT1G70830
AT5G64570
AT3G22060
AT5G64130
AT5G47040
AT1G23080
AT4G33680
AT5G45390
AT2G16500
AT1G05010
AT1G01550
AT4G24280
AT1G65960
AT4G26910
AT1G67230
AT5G10960
AT2G43710
AT1G64370
AT5G06570
AT5G16370
AT5G23050
AT4G35100
AT3G02260
AT1G78300
AT5G56010
AT1G60950
AT5G59420
AT2G31040
AT1G14810
AT5G21160
AT2G33800
AT1G04400
AT2G40880
AT1G11750
AT5G65670
AT3G63490
AT3G18780
AT3G20370
AT2G03680
AT1G80380
AT3G04870
AT3G16770
AT3G47070
AT5G46110
AT5G42390
AT2G28290
AT1G55860
AT1G77760
AT1G19000
AT5G54770
AT1G55490
AT5G64740
AT2G02130
AT5G02940
AT2G39310
AT5G11670
AT2G35050
AT5G57110
AT2G38290
AT3G14930
AT1G48350
AT2G01140
AT1G79245
AT5G03290
AT1G56190
AT3G43810
AT5G43940
AT1G66200
AT1G63010
AT2G24090
AT1G65980
AT3G04720
AT5G23890
AT5G15450
AT3G14415
AT1G20010
AT5G24710
AT1G79600
AT4G25370
AT3G61050
AT3G28710
AT5G33320
AT5G14780
AT1G31812
AT2G25430
AT4G36250
AT2G30870
AT2G26910
AT4G03260
AT5G67300
AT4G23650
AT1G23820
AT3G46970
AT3G23400
AT4G01310
AT2G20760
AT4G22505
AT1G34000
AT2G47470
AT3G46030
AT5G26667
AT4G18950
AT5G16620
AT5G40760
AT3G16450
AT1G62380
AT2G38240
AT2G06530
AT3G26570
AT4G25570
AT1G79550
AT1G30400
AT2G05380
AT5G58140
AT2G47170
AT3G43300
AT4G34050
AT4G25030
AT3G06860
AT3G05730
AT3G56860
AT5G16150
AT3G17800
AT1G74910
AT2G27690
AT1G43160
AT5G59090
AT2G21160
AT1G74970
AT3G14210
AT5G02380
AT3G08030
AT1G76810
AT3G11630
AT1G25550
AT5G47110
AT1G75330
AT5G19760
AT2G29400
AT4G14040
AT5G48620
AT5G66120
AT5G62790
AT1G10950
AT4G28880
AT1G16720
AT1G70760
AT1G20696
AT1G50920
AT4G37120
AT4G23100
AT4G08850
AT2G45470
AT3G15640
AT5G14800
AT5G01590
AT1G19910
AT2G01420
AT4G17840
AT5G60410
AT5G49910
AT5G42950
AT1G53210
AT1G28330
AT5G42090
AT3G62980
AT1G06950
AT4G37610
AT3G11560
AT1G62390
AT5G20020
AT4G39350
AT4G21960
AT4G19210
AT1G12240
AT1G71030
AT1G29920
AT3G20390
AT1G42550
AT5G62720
AT2G31960
AT1G04690
AT2G43750
AT4G16380
AT5G66040
AT1G20980
AT2G38390
AT3G04340
AT5G22800
AT1G67280
AT1G73060
AT4G20890
AT1G54410
AT4G31990
AT2G44350
AT4G25640
AT5G10450
AT5G03940
AT3G24180
AT1G04820
AT5G19690
AT3G56940
AT2G29550
AT5G06290
AT3G01420
AT4G11010
AT4G29840
AT1G10960
AT2G42490
AT3G45780
AT1G48520
AT4G24190
AT5G47200
AT5G63570
AT1G02560
AT1G69870
AT1G35580
AT3G27380
AT4G24220
AT2G45960
AT5G46420
AT1G63770
AT4G38920
AT4G01850
AT1G67870
AT1G20970
AT1G75500
AT5G11500
AT4G11570
AT3G50970
AT4G13930
AT1G74920
AT4G40040
AT5G14320
AT5G18660
AT2G23670
AT3G51820
AT4G01700
AT5G14030
AT3G14690
AT4G24770
AT1G27760
AT1G50010
AT5G59910
AT1G61380
AT1G23130
AT1G08200
AT4G17140
AT3G61870
AT5G24930
AT3G47800
AT1G60710
AT4G16155
AT5G58250
AT4G14960
AT4G10480
AT1G02500
AT5G49030
AT4G38770
AT1G27320
AT2G19730
AT4G29060
AT4G28300
AT4G36810
AT3G62290
AT5G62000
AT5G13980
AT1G06410
AT2G29980
AT3G06720
AT2G01670
AT5G12250
AT3G52150
AT4G01050
AT1G79920
AT1G54100
AT4G17600
AT4G19880
AT5G65010
AT3G48690
AT5G28300
AT1G66670
AT2G41430
AT3G46010
AT5G14260
AT3G49680
AT5G09650
AT3G26650
AT2G30970
AT4G30960
AT4G17530
AT1G07110
AT4G34230
AT3G19760
AT2G43030
AT2G17840
AT1G79940
AT2G01110
AT3G15360
AT1G02890
AT5G10180
AT1G20620
AT1G13245
AT2G26900
AT5G43470
AT3G52450
AT1G09270
AT1G66430
AT3G19170
AT4G35310
AT2G33450
AT1G64230
AT1G71500
AT4G17040
AT1G58807
AT3G10985
AT5G55850
AT5G17870
AT3G62030
AT4G20980
AT3G20410
AT1G78630
AT2G05990
AT1G70490
AT4G22330
AT4G24620
AT2G36880
AT4G26850
AT5G41790
AT5G30510
AT1G23390
AT4G34890
AT5G13930
AT2G31570
AT1G66260
AT5G39570
AT1G32230
AT3G09200
AT1G19350
AT5G64300
AT3G04120
AT3G14990
AT5G51110
AT4G39330
AT4G22670
AT5G10840
AT3G14230
AT5G50920
AT3G27240
AT5G24690
AT3G23990
AT1G09780
AT1G36320
AT3G58750
AT2G17720
AT5G53460
AT2G43150
AT1G76180
AT3G24503
AT3G46060
AT5G48930
AT1G26580
AT3G20820
AT5G57870
AT4G38520
AT5G04430
AT3G18035
AT4G04020
AT5G61960
AT5G56030
AT5G27350
AT5G16050
AT4G21860
AT3G25660
AT4G01690
AT5G26742
AT1G68530
AT3G10740
AT2G25080
AT1G48850
AT3G47960
AT2G05710
AT1G14830
AT5G36700
AT3G17820
AT1G70320
AT5G43780
AT5G12150
AT5G65020
AT1G19770
AT5G11710
AT1G09210
AT2G30440
AT3G55970
AT5G63190
AT4G38680
AT1G13440
AT2G14910
AT1G80600
AT2G39970
AT3G23600
AT5G10980
AT5G09810
AT4G22890
AT1G50250
AT5G04140
AT4G16143
AT3G59940
AT5G02500
AT3G14310
AT3G02780
AT3G47650
AT5G53480
AT1G04480
AT3G13120
AT2G42600
AT2G43090
AT1G07320
AT5G17710
AT4G18710
AT5G07010
AT5G63310
AT1G76010
AT5G40370
AT2G41740
AT1G54630
AT1G35160
AT1G09130
AT2G33340
AT1G53840
AT3G09440
AT1G75350
AT4G38740
AT3G59920
AT3G63500
AT1G52220
AT3G58730
AT5G04170
AT3G18390
AT5G23060
AT3G57150
AT2G31390
AT1G59610
AT5G18650
AT2G47940
AT1G45000
AT5G60360
AT4G11150
AT3G12290
AT3G63520
AT5G07350
AT4G34720
AT2G18440
AT5G07460
AT5G03730
AT3G22440
AT5G13420
AT1G14670
AT2G38140
AT1G29070
AT3G44890
AT2G42500
AT3G05560
AT1G68830
AT4G39080
AT4G28080
AT3G03780
AT2G37660
AT1G58080
AT2G18280
AT5G54600
AT5G54760
AT1G09430
AT1G56110
AT4G15550
AT1G02660
AT1G18500
AT2G46340
AT2G34590
AT5G23040
AT3G58140
AT5G21090
AT4G30600
AT2G33830
AT2G33770
AT5G22090
AT4G29950
AT3G53420
AT5G53300
AT5G21940
AT5G09220
AT5G11700
AT4G34190
AT3G15730
AT1G24360
AT5G18380
AT4G32060
AT2G47240
AT5G48160
AT5G46630
AT1G18080
AT1G54080
AT4G38600
AT3G16420
AT1G12840
AT3G01540
AT5G40950
AT5G10860
AT3G16640
AT3G14840
AT3G22380
AT5G17020
AT3G50590
AT3G60750
AT1G14890
AT4G09650
AT5G21020
AT5G05600
AT1G23490
AT1G15820
AT1G79990
AT2G44160
AT5G12140
AT3G58610
AT2G36380
AT5G55220
AT3G12630
AT3G46740
AT2G43160
AT3G15840
AT1G04080
AT3G53580
AT3G55770
AT3G61580
AT1G24510
AT3G06350
AT1G01100
AT5G13440
AT1G35680
AT5G19120
AT2G26500
AT1G10590
AT3G11170
AT1G75220
AT4G27800
AT2G34430
AT4G23850
AT3G01280
AT3G23030
AT3G15190
AT5G53350
AT2G07360
AT2G37190
AT3G54210
AT3G42050
AT5G13650
AT3G55410
AT4G25170
AT1G20450
AT1G68590
AT2G25970
AT4G39400
AT3G16520
AT3G20050
AT1G29400
AT2G40940
AT1G02150
AT5G59880
AT4G02890
AT5G26830
AT1G35720
AT4G25100
AT5G64040
AT3G24160
AT3G27690
AT3G01690
AT4G19860
AT4G38800
AT2G19480
AT2G39200
AT5G55190
AT5G05010
AT2G35390
AT5G58950
AT3G28860
AT3G22960
AT4G15470
AT2G35490
AT4G02510
AT3G52880
AT1G64790
AT1G69740
AT4G27440
AT1G03680
AT1G04170
AT5G47010
AT3G54660
AT1G15980
AT5G56680
AT2G43680
AT3G50000
AT3G18890
AT4G21570
AT5G28540
AT5G42270
AT5G46020
AT1G48450
AT4G05050
AT2G41840
AT3G25920
AT5G62690
AT4G25740
AT5G20920
AT1G68010
AT4G02230
AT3G24430
AT4G19200
AT1G67700
AT4G02480
AT1G12800
AT1G64140
AT3G10020
AT1G79040
AT1G52360
AT5G60640
AT3G23940
AT4G31490
AT1G70780
AT2G17420
AT5G11200
AT3G56190
AT3G02750
AT3G08740
AT1G09570
AT3G48050
AT3G48000
AT1G01490
AT5G19510
AT5G46430
AT1G34430
AT4G21150
AT2G17500
AT2G37040
AT1G15290
AT2G42220
AT3G11450
AT1G53310
AT5G24210
AT2G37220
AT5G20720
AT5G65220
AT5G46210
AT2G45820
AT5G19820
AT2G27730
AT5G53160
AT1G79530
AT1G11910
AT4G37930
AT5G08280
AT5G44290
AT2G43620
AT1G15500
AT5G08300
AT3G09390
AT4G27960
AT5G54170
AT4G37300
AT5G42300
AT3G27160
AT1G67090
AT4G36040
AT5G45350
AT2G17360
AT1G12920
AT1G08520
AT3G58680
AT1G80070
AT5G58070
AT5G03880
AT5G01210
AT2G46330
AT5G15090
AT3G12780
AT1G04420
AT3G62530
AT3G19130
AT5G13120
AT5G47120
AT1G64720
AT1G32080
AT1G06430
AT4G19160
AT1G72370
AT5G14740
AT3G26730
AT2G02160
AT3G56340
AT2G28800
AT4G27600
AT2G13360
AT5G48230
AT3G09630
AT4G31290
AT2G47450
AT1G23740
AT1G12410
AT5G13000
AT5G54310
AT3G07110
AT4G22220
AT3G11130
AT5G01750
AT1G55020
AT1G15340
AT3G13580
AT2G26670
AT5G54540
AT4G23470
AT1G79850
AT2G39730
AT3G27830
AT4G34670
AT2G21170
AT3G63460
AT1G09770
AT4G30270
AT1G79830
AT2G24790
AT5G13630
AT3G62120
AT5G20630
AT4G37870
AT1G02080
AT2G27530
AT4G34450
AT5G07020
AT1G51650
AT4G33010
AT4G32285
AT1G76100
AT3G52140
AT2G39460
AT3G54110
AT1G64510
AT1G17880
AT1G04750
AT5G54270
AT5G47190
AT1G48830
AT3G55610
AT5G35210
AT1G30580
AT4G25130
AT3G53430
AT4G35250
AT3G08940
AT2G36160
AT2G31400
AT3G10380
AT5G46290
AT2G26890
AT5G13450
AT5G14040
AT5G17330
AT3G05165
AT5G16710
AT5G60600
AT5G16880
AT5G42020
AT2G38800
AT5G61780
AT5G38410
AT4G09010
AT1G15930
AT2G37110
AT5G23120
AT5G65700
AT4G11420
AT5G39590
AT1G13110
AT4G30950
AT1G79930
AT1G48920
AT1G47530
AT2G28840
AT5G19990
AT5G67500
AT1G14740
AT4G16190
AT5G67030
AT5G66190
AT2G20360
AT5G64840
AT3G03960
AT3G51950
AT5G59850
AT3G03940
AT1G01790
AT1G74470
AT3G02560
AT1G23310
AT3G06650
AT3G04920
AT1G10670
AT2G24360
AT3G60530
AT4G31480
AT1G51200
AT5G20890
AT2G37550
AT3G27850
AT1G25560
AT3G57290
AT5G62700
AT5G15970
AT1G20020
AT3G14110
AT5G63840
AT2G18040
AT4G35750
AT5G11560
AT3G26070
AT1G26880
AT1G36370
AT1G26270
AT1G77940
AT3G63540
AT1G53240
AT3G59970
AT5G26000
AT4G16950
AT2G18020
AT1G54270
AT1G73030
AT1G15750
AT1G79750
AT4G18730
AT3G50820
AT4G17520
AT4G17560
AT1G11840
AT5G57660
AT2G21580
AT1G50320
AT4G01000
AT2G16950
AT5G08690
AT5G01410
AT1G29880
AT1G36732
AT5G02240
AT1G09530
AT4G27870
AT2G39980
AT1G65820
AT2G33370
AT4G02530
AT1G56500
AT3G58500
AT2G38230
AT3G11710
AT5G56710
AT1G23190
AT1G59359
AT5G25280
AT1G08830
AT4G17330
AT2G05520
AT4G11260
AT2G47000
AT4G32260
AT3G53740
AT3G25530
AT2G30950
AT2G42680
AT5G07090
AT2G46020
AT5G47700
AT4G12800
AT3G51370
AT5G15230
AT5G11770
AT4G02770
AT4G11600
AT2G29080
AT1G22840
AT5G17770
AT2G36530
AT3G01480
AT3G44110
AT4G20360
AT5G01530
AT4G27520
AT3G11940
AT1G70770
AT1G04850
AT4G24820
AT5G12860
AT4G27500
AT5G25610
AT1G56220
AT5G28500
AT2G18750
AT4G00100
AT2G23070
AT4G00810
AT4G10340
AT5G42980
AT1G32470
AT5G27700
AT1G56200
AT3G48170
AT1G72710
AT1G14000
AT4G38970
AT4G03520
AT3G63410
AT3G07780
AT4G01800
AT1G16080
AT3G54050
AT1G66280
AT1G75950
AT3G59020
AT1G30630
AT1G57720
AT2G34860
AT1G32060
AT4G01100
AT4G14880
AT2G40360
AT1G30380
AT1G36160
AT1G11860
AT3G13460
AT3G04910
AT3G57550
AT2G20990
AT2G45540
AT5G61380
AT5G64940
AT4G22490
AT5G52920
AT5G35970
AT3G53180
AT4G20860
AT5G26360
AT3G62700
AT3G63160
AT3G11830
AT4G39680
AT2G21520
AT5G03300
AT2G42210
AT3G13300
AT1G01470
AT5G23740
AT5G37600
AT5G04590
AT3G08850
AT1G50200
AT5G41700
AT4G33250
AT3G12345
AT4G35790
AT5G38660
AT1G15670
AT3G56910
AT2G40060
AT4G16150
AT5G57990
AT1G07590
AT1G55360
AT1G09310
AT5G09900
AT5G14720
AT1G77490
AT1G27970
AT5G05690
AT2G15890
AT4G04640
AT5G23540
AT2G44790
AT1G09620
AT1G28290
AT5G05780
AT2G47510
AT2G15960
AT2G46820
AT1G49760
AT4G13010
AT3G09820
AT5G19140
AT1G06680
AT2G41220
AT4G13510
AT5G08650
AT2G41110
AT1G16180
AT5G52310
AT3G08510
AT3G25520
AT5G11170
AT5G64960
AT5G20950
AT4G16830
AT5G37510
AT1G52740
AT2G28910
AT4G31300
AT3G01290
AT3G24830
AT1G21110
AT1G49970
AT3G19820
AT2G47610
AT2G27720
AT1G26110
AT4G20850
AT3G22120
AT4G02930
AT1G45474
AT2G41680
AT5G06360
AT4G01290
AT1G13930
AT2G27020
AT3G07480
AT3G03100
AT4G21710
AT4G38630
AT1G66410
AT3G10920
AT3G48930
AT1G57660
AT5G04800
AT2G24020
AT3G23700
AT3G52470
AT5G19330
AT4G15530
AT1G20960
AT1G03600
AT2G36620
AT2G02100
AT1G55350
AT5G16130
AT1G25098
AT1G62750
AT2G21390
AT3G01910
AT2G44100
AT5G66760
AT5G52240
AT4G33090
AT5G50850
AT1G18540
AT4G29160
AT1G42960
AT3G16000
AT4G15110
AT5G62890
AT1G25490
AT3G04400
AT5G41992
AT5G38470
AT5G62390
AT5G08680
AT1G15120
AT2G44080
AT2G20420
AT1G22780
AT3G05590
AT4G09800
AT1G10760
AT1G09690
AT4G00570
AT1G20340
AT4G39200
AT5G47560
AT4G32940
AT2G24270
AT3G09500
AT5G10540
AT4G26630
AT3G27090
AT4G34110
AT4G29040
AT5G49460
AT1G72020
AT5G47210
AT3G01120
AT1G56070
AT4G09320
AT2G01250
AT1G04270
AT1G76030
AT5G52840
AT1G29900
AT1G31710
AT1G09340
AT1G55480
AT3G51800
AT4G21280
AT3G61470
AT1G09590
AT5G57290
AT5G54500
AT4G30010
AT2G35370
AT1G27090
AT2G23350
AT1G13260
AT1G15950
AT1G09640
AT3G17850
AT3G10850
AT5G65620
AT5G61170
AT5G25560
AT1G44575
AT1G65290
AT1G23290
AT3G14420
AT1G78080
AT4G35450
AT1G53750
AT2G32240
AT1G23870
AT5G22640
AT2G42840
AT4G00430
AT2G42540
AT1G52510
AT4G23670
AT5G51970
AT5G02160
AT3G14600
AT3G02080
AT1G06290
AT1G03860
AT3G52850
AT5G37780
AT1G07770
AT3G01500
AT3G17810
AT1G51800
AT3G56150
AT3G50500
AT4G34870
AT4G30650
AT1G65930
AT2G27600
AT1G33140
AT3G62420
AT2G46220
AT1G14320
AT5G08050
AT3G53890
AT1G02840
AT1G08380
AT3G60770
AT3G02730
AT2G32060
AT5G60390
AT4G16720
AT3G22110
AT3G15000
AT1G11580
AT1G02780
AT1G47420
AT1G08360
AT5G42790
AT1G78660
AT3G60600
AT2G05920
AT4G19410
AT2G20260
AT3G16140
AT1G52980
AT4G21210
AT1G31330
AT1G58270
AT3G04790
AT2G05070
AT5G63450
AT5G65310
AT3G17020
AT4G29010
AT2G20580
AT2G38040
AT2G39990
AT2G25490
AT5G27470
AT4G36800
AT1G05190
AT2G23120
AT5G41520
AT5G48810
AT2G39400
AT4G34620
AT1G77180
AT2G17390
AT1G06570
AT3G05530
AT4G13430
AT5G35530
AT5G08670
AT5G18230
AT2G31610
AT3G07100
AT5G17920
AT5G52650
AT2G16640
AT3G09840
AT1G04440
AT3G04840
AT2G46280
AT1G17220
AT1G21500
AT4G31180
AT4G29670
AT3G21055
AT2G43460
AT5G25350
AT1G34030
AT4G21105
AT1G78900
AT3G59780
AT4G01150
AT1G59900
AT2G40490
AT3G29360
AT5G11520
AT4G19110
AT1G47260
AT2G30110
AT3G12120
AT3G02090
AT1G47128
AT5G20290
AT3G50370
AT1G54000
AT3G05840
AT4G37410
AT2G37640
AT1G65260
[truncated: 319 more rows]

## Sheet: 8 Hours Reference List
AT2G41240
AT2G30770
AT1G14540
AT2G30750
AT3G60140
AT2G43570
AT5G13320
AT4G37370
AT3G26830
AT5G41750
AT5G25250
AT4G14365
AT3G02840
AT5G26920
AT1G13340
AT5G57220
AT5G25930
AT1G51890
AT5G02490
AT1G30700
AT4G01360
AT5G42380
AT3G54150
AT5G52640
AT1G33960
AT1G66090
AT1G74710
AT4G30170
AT4G15390
AT1G26380
AT3G13950
AT5G52760
AT1G21120
AT1G35230
AT5G13080
AT1G62420
AT1G69930
AT5G27420
AT1G13520
AT3G25250
AT1G09932
AT3G25610
AT1G72900
AT5G67080
AT4G34150
AT3G02550
AT1G61820
AT1G80820
AT4G34390
AT1G07000
AT2G19190
AT2G38470
AT2G15490
AT2G05940
AT1G72520
AT1G08050
AT1G05680
AT2G31865
AT2G29460
AT3G51660
AT3G56400
AT5G22300
AT1G62300
AT2G46400
AT1G56240
AT4G04770
AT5G17170
AT1G66880
AT1G26420
AT4G01870
AT5G39580
AT3G47540
AT4G39030
AT4G23190
AT2G35980
AT2G02010
AT3G63380
AT4G12720
AT5G39670
AT4G39640
AT2G13790
AT5G25260
AT2G18193
AT5G23020
AT2G15480
AT3G14050
AT3G52430
AT5G53450
AT5G20230
AT3G18290
AT4G33050
AT1G02920
AT4G13250
AT3G11340
AT5G45110
AT4G20830
AT5G61900
AT3G49620
AT5G61210
AT5G13200
AT1G74360
AT5G13190
AT1G42990
AT2G36950
AT5G67340
AT2G37130
AT1G61800
AT5G08790
AT5G51830
AT2G24180
AT1G02930
AT4G39670
AT2G34500
AT3G46080
AT1G09080
AT5G52810
AT4G21390
AT1G68620
AT3G56710
AT5G27760
AT2G23170
AT2G45220
AT5G38900
AT4G25810
AT1G30755
AT1G23020
AT4G33920
AT5G01100
AT1G22400
AT5G60800
AT1G53625
AT5G35735
AT5G13740
AT1G13210
AT1G74310
AT5G05410
AT4G19520
AT1G64660
AT5G47910
AT3G22370
AT1G19250
AT1G30720
AT5G05730
AT2G18690
AT1G14870
AT2G39518
AT2G41100
AT3G11820
AT1G72680
AT1G10700
AT4G34135
AT1G25220
AT5G39050
AT3G44720
AT4G39950
AT4G10120
AT1G67810
AT2G04040
AT4G22530
AT4G17500
AT2G38860
AT1G18570
AT5G42050
AT2G31880
AT5G03610
AT3G46090
AT4G37390
AT3G50930
AT5G19240
AT2G29420
AT1G32940
AT3G60420
AT2G16060
AT2G23320
AT5G48540
AT2G30140
AT4G18950
AT1G19180
AT3G13080
AT3G22910
AT1G61340
AT3G05500
AT5G26340
AT4G11850
AT1G55450
AT2G36220
AT1G17170
AT4G17230
AT1G03220
AT4G11890
AT5G41740
AT5G54710
AT3G20370
AT4G23700
AT1G28190
AT5G47220
AT2G36690
AT1G01720
AT1G22280
AT3G55430
AT1G76600
AT3G12740
AT1G19020
AT5G63790
AT2G26560
AT1G51760
AT5G06860
AT5G48380
AT3G15500
AT1G55920
AT2G15390
AT5G04930
AT2G24850
AT4G27450
AT3G28930
AT4G11170
AT1G05560
AT5G44130
AT3G47340
AT2G46500
AT2G38380
AT4G17340
AT3G12580
AT1G74100
AT3G09350
AT4G02380
AT5G07440
AT1G30730
AT1G35710
AT1G25400
AT1G57990
AT1G30620
AT1G04040
AT5G17380
AT5G58120
AT1G10140
AT3G22060
AT3G44300
AT1G60730
AT4G24160
AT4G02520
AT5G16910
AT1G70850
AT5G67330
AT1G03870
AT2G32150
AT4G25700
AT4G37640
AT5G54810
AT1G28380
AT3G09440
AT1G76970
AT1G64400
AT1G65970
AT2G18670
AT3G48890
AT2G03760
AT3G44860
AT1G02360
AT1G61360
AT5G05250
AT2G39200
AT1G73080
AT3G14940
AT3G50480
AT1G66270
AT2G33120
AT3G46280
AT3G09830
AT3G06500
AT4G36500
AT1G18890
AT3G23550
AT2G23600
AT4G32480
AT4G13770
AT1G28600
AT2G04400
AT3G49530
AT3G19450
AT1G59590
AT5G13930
AT5G24530
AT1G51820
AT2G20960
AT1G69890
AT3G26910
AT5G01600
AT5G61560
AT1G07890
AT3G05200
AT2G37170
AT4G20860
AT5G67370
AT1G22410
AT5G58430
AT1G03370
AT2G36830
AT1G09070
AT1G66580
AT1G23710
AT3G54640
AT4G16370
AT1G69840
AT4G23570
AT2G47730
AT1G10340
AT2G18700
AT4G14630
AT1G17290
AT2G01530
AT3G45640
AT5G22060
AT3G17410
AT2G22170
AT3G56360
AT2G30250
AT3G50950
AT5G14730
AT5G04340
AT5G41080
AT4G17900
AT2G40140
AT4G26530
AT3G14620
AT2G24550
AT4G04960
AT4G39940
AT1G33110
AT4G33540
AT5G43350
AT2G16900
AT1G06640
AT3G62150
AT2G40000
AT1G25550
AT1G21250
AT3G51920
AT3G14990
AT1G75500
AT1G03740
AT1G54000
AT3G19010
AT1G78850
AT3G26840
AT1G12110
AT5G10695
AT2G17220
AT1G51800
AT3G59350
AT1G13990
AT2G29720
AT1G60950
AT1G61560
AT4G19880
AT5G59090
AT3G16530
AT5G18470
AT1G61250
AT3G13310
AT3G10500
AT5G08240
AT2G30550
AT2G23810
AT1G78380
AT3G21230
AT1G29690
AT1G54100
AT5G38200
AT2G37940
AT4G23210
AT1G58290
AT1G53430
AT1G31130
AT1G11310
AT4G21850
AT5G24210
AT5G17990
AT5G11520
AT3G08760
AT4G35630
AT3G52400
AT4G13430
AT3G63160
AT1G65690
AT3G07390
AT1G15520
AT1G80300
AT4G30210
AT5G14200
AT4G22710
AT4G30280
AT3G57880
AT2G15620
AT5G06320
AT5G52882
AT1G52200
AT4G11320
AT2G36580
AT5G49450
AT1G76680
AT4G05020
AT1G08450
AT1G28290
AT3G48090
AT5G07010
AT4G38540
AT4G15610
AT5G64310
AT5G47120
AT1G43910
AT3G43190
AT5G19230
AT4G04610
AT3G55270
AT3G50740
AT2G26190
AT4G34710
AT1G17745
AT5G44020
AT3G55470
AT4G35090
AT2G41560
AT1G20510
AT4G34120
AT4G15760
AT1G53440
AT4G34200
AT1G27100
AT3G16370
AT5G26280
AT4G23400
AT1G80840
AT2G26530
AT3G15950
AT1G32450
AT1G27770
AT4G33070
AT3G22600
AT1G29670
AT5G19550
AT1G59910
AT3G18830
AT2G44790
AT2G38290
AT1G56140
AT1G68520
AT2G45180
AT2G47000
AT5G38430
AT4G12420
AT4G01700
AT4G34131
AT1G70530
AT2G37110
AT5G57560
AT3G15356
AT3G52870
AT5G64250
AT2G37640
AT4G37800
AT2G02220
AT3G01290
AT1G53910
AT3G23810
AT1G62660
AT5G03380
AT2G28570
AT1G64980
AT3G17770
AT5G27380
AT5G58070
AT1G13360
AT3G47070
AT2G21620
AT3G26210
AT5G66210
AT1G76520
AT3G58750
AT4G36988
AT1G56660
AT3G10300
AT2G02390
AT3G23250
AT5G19440
AT3G44190
AT1G72610
AT2G36800
AT3G04210
AT5G04720
AT2G27830
AT2G42750
AT4G36670
AT2G43820
AT5G11420
AT5G47730
AT5G56350
AT5G20700
AT4G31550
AT2G44490
AT1G22890
AT2G01180
AT5G57035
AT1G75460
AT5G62350
AT4G12730
AT1G16720
AT5G44070
AT5G61160
AT1G28660
AT3G62410
AT2G05920
AT2G39400
AT1G73500
AT3G22890
AT5G02290
AT5G61820
AT1G76650
AT4G30530
AT1G04430
AT1G27130
AT1G64860
AT1G18590
AT1G15040
AT2G15970
AT4G19200
AT5G61010
AT2G26500
AT4G38770
AT4G33430
AT3G27060
AT1G59870
AT3G15850
AT1G35670
AT4G02940
AT5G54500
AT4G32460
AT5G37990
AT4G25050
AT5G26030
AT5G59820
AT2G03240
AT5G64300
AT1G02660
AT4G17390
AT3G49220
AT5G58350
AT3G02880
AT1G08930
AT4G21580
AT1G50010
AT5G24810
AT4G17870
AT1G45145
AT4G08770
AT3G16770
AT5G59420
AT1G55850
AT5G20000
AT2G27500
AT4G12545
AT2G10940
AT4G34890
AT4G09650
AT1G01550
AT1G52870
AT5G42020
AT4G22690
AT4G00360
AT4G15530
AT4G16980
AT2G46330
AT3G32980
AT1G78020
AT3G20410
AT4G38550
AT1G23440
AT2G22330
AT2G26080
AT1G10170
AT1G09940
AT1G27950
AT1G77760
AT3G57330
AT4G21830
AT2G22300
AT1G64280
AT1G21400
AT3G21630
AT3G61430
AT5G13490
AT3G46600
AT4G08850
AT4G18030
AT1G49660
AT1G21130
AT2G14890
AT2G30390
AT3G19240
AT5G60920
AT5G59730
AT2G32240
AT1G33590
AT4G26910
AT2G42890
AT3G23430
AT5G15410
AT2G06050
AT2G45470
AT1G12200
AT4G19210
AT1G09970
AT1G70940
AT1G71695
AT2G39570
AT1G75750
AT2G28000
AT1G80440
AT2G20900
AT5G45350
AT1G16880
AT3G60190
AT2G41420
AT4G23850
AT1G18210
AT5G27600
AT1G48600
AT4G31860
AT1G03630
AT3G13790
AT4G34460
AT1G68530
AT1G32920
AT5G54160
AT2G39210
AT3G04790
AT3G54620
AT1G21450
AT2G06530
AT2G06850
AT5G43450
AT4G28660
AT4G17090
AT5G20280
AT1G22530
AT1G25440
AT5G13650
AT5G04170
AT4G39260
AT1G21100
AT5G20960
AT5G65310
AT2G44670
AT5G51070
AT1G19530
AT5G16970
AT3G51600
AT1G28580
AT1G68560
AT5G47780
AT4G34180
AT2G04842
AT4G29900
AT1G75380
AT3G01420
AT1G20010
AT1G55020
AT3G25690
AT2G43535
AT4G23470
AT1G70600
AT4G37410
AT3G53420
AT1G54010
AT1G64710
AT2G27710
AT5G20830
AT4G17600
AT5G19770
AT5G47700
AT4G28300
AT4G25900
AT2G40270
AT5G64040
AT5G24165
AT1G64370
AT1G11860
AT2G19800
AT2G01520
AT3G05900
AT2G29550
AT3G05560
AT4G17560
AT5G12150
AT2G01670
AT4G23010
AT1G76990
AT5G04810
AT2G04030
AT1G12360
AT1G48210
AT3G51950
AT4G35310
AT3G57550
AT3G03780
AT5G38420
AT4G13930
AT5G17760
AT2G30990
AT1G64680
AT1G73330
AT3G61870
AT5G39590
AT3G59660
AT5G66850
AT1G21110
AT3G05730
AT1G68590
AT3G54050
AT2G36990
AT4G13180
AT2G26250
AT5G55220
AT2G41410
AT1G45201
AT1G77510
AT3G09260
AT3G01690
AT1G22930
AT5G01590
AT3G52450
AT1G02850
AT3G51670
AT1G57660
AT3G55980
AT1G73655
AT1G33600
AT2G47240
AT5G04410
AT2G24200
AT2G38230
AT3G14415
AT1G62750
AT4G31500
AT1G10760
AT5G08650
AT1G13260
AT5G22630
AT5G17230
AT2G33150
AT4G25570
AT3G13330
AT1G07110
AT5G13770
AT5G35200
AT4G33300
AT5G43580
AT4G36360
AT5G57930
AT2G21330
AT3G16420
AT4G08470
AT2G33770
AT1G20840
AT1G29470
AT4G16760
AT3G54400
AT1G55480
AT5G26260
AT3G60245
AT1G26270
AT5G08050
AT4G30490
AT3G14650
AT3G13610
AT5G16130
AT4G25100
AT4G18480
AT4G15110
AT4G16720
AT3G23530
AT5G43060
AT2G34680
AT4G38740
AT3G45780
AT1G32060
AT1G35680
AT3G52150
AT4G38970
AT1G04820
AT4G11280
AT4G32410
AT5G28050
AT4G36250
AT1G29070
AT5G53490
AT1G42970
AT5G63310
AT2G17840
AT3G59780
AT5G07090
AT3G02360
AT3G53430
AT1G23080
AT4G20110
AT5G47190
AT3G63540
AT1G34370
AT5G40850
AT3G62250
AT3G62530
AT1G79690
AT3G62600
AT2G43710
AT5G19780
AT2G35930
AT1G71500
AT4G00100
AT4G14960
AT1G23870
AT4G22490
AT1G75680
AT4G29950
AT4G30270
AT4G32940
AT3G52500
AT5G49730
AT4G00430
AT1G76160
AT4G16490
AT5G13510
AT5G12480
AT1G34000
AT5G05140
AT1G27020
AT1G18740
AT4G39350
AT3G02730
AT2G37970
AT1G79850
AT2G36120
AT5G23240
AT3G07780
AT4G25740
AT4G34870
AT1G54780
AT3G52380
AT1G74470
AT2G23670
AT4G09150
AT5G21105
AT1G37130
AT5G51110
AT4G10480
AT4G16660
AT3G56880
AT2G01250
AT4G33010
AT2G05990
AT4G34190
AT1G65840
AT1G68010
AT5G17870
AT5G45410
AT1G09690
AT3G13120
AT1G25275
AT3G55800
AT5G61410
AT3G28180
AT3G53260
AT5G65110
AT5G28500
AT1G06570
AT5G42530
AT3G27240
AT2G16500
AT3G04840
AT1G31330
AT3G57530
AT4G18100
AT3G57450
AT3G24550
AT2G37220
AT1G09750
AT4G24290
AT1G32470
AT1G20020
AT3G62830
AT2G38120
AT5G22640
AT5G64260
AT3G29320
AT5G67385
AT5G14740
AT4G25670
AT3G17240
AT5G54940
AT1G27400
AT1G07320
AT2G45300
AT5G28540
AT3G47250
AT1G15980
AT4G02920
AT3G11700
AT1G69530
AT3G23700
AT5G40950
AT1G68440
AT4G30790
AT5G48010
AT5G46290
AT2G26910
AT5G09660
AT5G13800
AT2G17500
AT3G01480
AT1G05850
AT3G04400
AT5G18480
AT1G03680
AT4G18730
AT4G18010
AT4G23270
AT1G12900
AT2G05710
AT5G58140
AT2G27680
AT3G24430
AT4G17490
AT5G21940
AT2G39010
AT5G61170
AT5G05170
AT3G27850
AT3G20820
AT1G70290
AT5G33320
AT5G51820
AT3G16000
AT5G59550
AT2G39460
AT3G63410
AT5G66040
AT4G15545
AT5G20010
AT5G25460
AT1G08540
AT2G34480
AT1G55490
AT4G04640
AT4G12550
AT2G14750
AT1G36160
AT4G01800
AT1G24100
AT2G24280
AT1G58270
AT5G58420
AT5G55930
AT4G12480
AT1G08920
AT1G62740
AT3G46970
AT1G12800
AT5G26751
AT3G15210
AT4G14320
AT3G09940
AT4G15000
AT5G47560
AT3G13110
AT3G11510
AT4G14680
AT1G63000
AT5G47990
AT4G29060
AT3G62010
AT4G16990
AT3G55750
AT5G27850
AT3G24170
AT1G20340
AT5G02760
AT4G39980
AT5G38520
AT4G20360
AT1G70410
AT5G65010
AT1G70760
AT4G37510
AT1G43670
AT1G30360
AT1G09590
AT3G23820
AT4G35450
AT4G00300
AT3G10985
AT1G13930
AT1G15690
AT1G41880
AT4G16890
AT2G37710
AT1G03130
AT2G44080
AT2G47800
AT4G35100
AT1G10960
AT1G51500
AT2G39730
AT5G61590
AT3G53740
AT3G52800
AT1G09310
AT1G15670
AT1G65845
AT1G48030
AT3G27820
AT5G46180
AT2G36620
AT2G30440
AT4G34620
AT5G35790
AT3G48930
AT1G18540
AT5G28840
AT5G07020
AT2G20920
AT5G42950
AT1G78040
AT4G04340
AT5G22500
AT3G25530
AT5G23740
AT5G02960
AT5G10470
AT3G14420
AT5G39740
AT5G45130
AT3G26520
AT3G09820
AT1G03600
AT5G20720
AT5G47040
AT3G01500
AT5G48180
AT2G43910
AT5G09220
AT2G43620
AT2G04700
AT4G39330
AT1G73030
AT2G38530
AT1G35580
AT1G15290
AT5G53170
AT5G02870
AT2G21970
AT3G05590
AT5G65630
AT3G07460
AT4G31700
AT3G55410
AT1G64950
AT1G72370
AT4G33580
AT5G51970
AT1G27730
AT4G17520
AT4G21280
AT1G77120
AT3G44880
AT5G59850
AT1G17500
AT2G37660
AT5G12250
AT1G56500
AT1G59359
AT4G00710
AT5G04590
AT5G67360
AT5G14910
AT5G40370
AT5G43700
AT1G48830
AT5G22800
AT4G21960
AT4G01310
AT2G01420
AT5G08300
AT2G47400
AT5G18130
AT2G29630
AT3G16460
AT2G37190
AT2G42880
AT5G66190
AT3G53870
AT1G70730
AT3G52960
AT1G74730
AT3G49010
AT2G35370
AT2G44120
AT5G21090
AT4G00730
AT2G30600
AT3G07110
AT3G45140
AT2G47450
AT2G41430
AT2G13360
AT1G10410
AT3G14240
AT3G48780
AT4G34138
AT4G02770
AT1G48300
AT1G15500
AT1G12240
AT4G09320
AT3G49910
AT1G18080
AT1G12090
AT1G51805
AT1G16080
AT2G24090
AT3G44630
AT5G21930
AT1G08630
AT3G15980
AT2G03440
AT4G38680
AT2G40490
AT3G54210
AT3G63520
AT4G25080
AT3G21055
AT4G24620
AT4G03280
AT5G64100
AT2G27720
AT4G18240
AT2G38870
AT5G53140
AT3G62420
AT2G20610
AT2G20890
AT1G65820
AT1G20330
AT1G17880
AT4G30950
AT3G27830
AT5G47210
AT5G35530
AT4G04830
AT3G15190
AT5G19760
AT1G14000
AT5G40760
AT1G29340
AT1G49600
AT1G29900
AT4G36130
AT4G34830
AT3G06510
AT3G47730
AT4G36040
AT4G02530
AT4G24920
AT5G09590
AT2G35260
AT5G26742
AT1G69620
AT1G76790
AT2G24360
AT5G04740
AT1G54130
AT1G77940
AT3G08640
AT2G43460
AT1G23740
AT1G42550
AT1G52300
AT5G52920
AT5G19220
AT1G01470
AT1G07135
AT1G67230
AT1G09340
AT1G48850
AT5G13000
AT5G03040
AT1G20110
AT5G23060
AT5G47110
AT4G35250
AT2G38310
AT5G44790
AT2G33370
AT1G70160
AT1G01100
AT4G38470
AT3G22230
AT3G26570
AT1G53240
AT3G01120
AT3G49110
AT4G27520
AT2G47610
AT3G03960
AT3G12345
AT1G01320
AT1G49760
AT3G53460
AT1G78830
AT5G02480
AT1G01620
AT1G72150
AT1G02150
AT1G35720
AT1G73260
AT5G15200
AT1G22710
AT1G32990
AT4G22240
AT1G04780
AT5G13630
AT1G17220
AT1G67700
AT1G76010
AT4G01370
AT2G26900
AT1G08200
AT4G37120
AT3G11170
AT1G13110
AT5G16730
AT5G38530
AT1G31812
AT3G24830
AT3G56310
AT5G18380
AT2G45740
AT5G46430
AT2G38140
AT4G27090
AT4G28080
AT2G43160
AT3G60320
AT4G40030
AT5G52650
AT5G47770
AT3G25920
AT5G36700
AT3G10230
AT5G03290
AT2G05380
AT1G45474
AT2G18020
AT5G63600
AT3G18390
AT1G63940
AT1G56110
AT1G15930
AT5G57290
AT1G62480
AT1G05190
AT1G51400
AT2G03890
AT4G12470
AT1G34430
AT5G16370
AT4G37610
AT3G28860
AT2G43030
AT2G27530
AT4G21990
AT1G22780
AT5G56710
AT5G46420
AT3G53020
AT1G58360
AT1G09780
AT4G36648
AT3G19820
AT3G62870
AT2G23350
AT3G47650
AT3G24190
AT3G63310
AT4G04040
AT3G23050
AT5G02450
AT3G04920
AT3G09500
AT4G21210
AT2G38040
AT1G32080
AT5G15230
AT4G26970
AT1G73230
AT5G37740
AT1G04270
AT1G03230
AT2G18960
AT3G56340
AT5G48385
AT2G31610
AT5G44190
AT2G05220
AT2G30490
AT5G25100
AT3G52590
AT2G47110
AT2G38540
AT1G19670
AT5G41520
AT5G14970
AT3G01472
AT2G42220
AT2G22125
AT4G36760
AT1G19000
AT5G65750
AT3G49120
AT5G65700
AT2G07050
AT3G51800
AT5G22090
AT3G59400
AT1G54410
AT1G75800
AT3G56910
AT3G58610
AT2G37040
AT3G44890
AT3G62650
AT5G38410
AT3G16240
AT1G62180
AT2G25450
AT4G27870
AT3G21690
AT5G36230
AT5G40780
AT1G65960
AT3G02560
AT5G22650
AT5G17920
AT5G35970
AT1G06950
AT4G39400
AT2G23120
AT5G02160
AT2G19730
AT3G20250
AT5G19855
AT5G09870
AT2G34430
AT4G21750
AT1G67430
AT4G27600
AT3G48740
AT3G63190
AT2G42840
AT5G14920
AT2G38390
AT4G26080
AT2G33800
AT1G07770
AT1G32640
AT3G63140
AT3G46780
AT3G60770
AT1G53210
AT1G54580
AT1G08360
AT5G49030
AT2G06520
AT5G25630
AT1G48350
AT1G72450
AT5G46020
AT5G43760
AT2G36160
AT5G16880
AT1G30380
AT1G67740
AT4G05320
AT5G06290
AT2G22500
AT1G06460
AT1G09560
AT1G74060
AT4G39200
AT1G52230
AT5G23900
AT1G26850
AT3G60750
AT5G53160
AT3G15450
AT4G14210
AT4G09010
AT5G03650
AT2G44160
AT4G29040
AT1G67090
AT3G61110
AT3G25230
AT2G45960
AT1G32130
AT3G25520
AT5G59540
AT3G23280
AT3G07560
AT4G17840
AT3G02080
AT4G01050
AT1G64510
AT5G20890
AT1G20980
AT4G27960
AT1G72930
AT5G20290
AT5G54770
AT4G30600
AT4G37520
AT3G08740
AT1G31800
AT1G44575
AT5G26570
AT1G21750
AT4G11360
AT2G47590
AT1G02780
AT3G50820
AT3G14840
AT3G48560
AT2G17290
AT1G20620
AT2G36910
AT5G58290
AT4G08920
AT3G48730
AT5G46250
AT3G06700
AT2G17360
AT1G33140
AT5G62890
AT1G75350
AT4G23890
AT3G46740
AT4G22470
AT2G01110
AT2G01820
AT3G15353
AT3G53180
AT3G61260
AT4G29780
AT5G18670
AT3G25830
AT1G78630
AT2G24020
AT5G04870
AT1G31580
AT4G27280
AT2G29400
AT5G64740
AT3G23390
AT5G61530
AT3G54660
AT3G18740
AT5G03300
AT4G03210
AT3G14600
AT1G61520
AT1G15130
AT3G51820
AT1G06680
AT3G62120
AT2G37270
AT5G03940
AT5G30510
AT3G26070
AT1G13440
AT3G20050
AT3G12780
AT3G26650
AT5G58250
AT1G76150
AT2G33450
AT2G01450
AT3G11940
AT1G19350
AT1G51060
AT1G08190
AT1G67870
AT4G24770
AT3G27160
AT1G01790
AT1G76080
AT5G28060
AT2G28800
AT4G13850
AT1G29910
AT1G23490
AT5G64120
AT5G44580
AT5G45510
AT4G14040
AT1G04480
AT1G68840
AT4G05180
AT5G18650
AT1G58848
AT3G13750
AT5G18170
AT5G05690
AT1G58080
AT1G78240
AT3G04730
AT2G05620
AT3G48760
AT4G17530
AT4G38800
AT4G03550
AT5G57580
AT1G23290
AT3G10410
AT1G53840
AT5G54600
AT5G66200
AT5G65220
AT3G09200
AT1G21000
AT3G08510
AT4G27440
AT3G16670
AT2G31360
AT1G79750
AT1G60710
AT2G41700
AT1G05570
AT2G01600
AT4G24690
AT2G34590
AT2G46820
AT5G59890
AT4G34670
AT2G28900
AT3G24503
AT1G25098
AT3G51130
AT5G04140
AT5G52840
AT4G24190
AT1G24510
AT2G45820
AT5G54960
AT1G21640
AT2G30570
AT2G41840
AT1G76180
AT2G26300
AT3G10850
AT3G58140
AT2G21160
AT5G05600
AT4G34881
AT1G52220
AT3G45300
AT3G62030
AT4G27300
AT3G11560
AT1G19110
AT1G33120
AT1G51570
AT4G16860
AT4G32020
AT1G79380
AT4G23600
AT4G35230
AT5G55120
AT5G04040
AT5G04430
AT1G31420
AT3G07700
AT2G36460
AT5G25610
AT3G17800
AT5G14320
AT3G01390
AT1G74970
AT5G11670
AT5G46800
AT5G62300
AT1G01090
AT5G44290
AT1G20260
AT5G23120
AT3G10380
AT1G27760
AT5G19940
AT3G03250
AT1G55670
AT3G14110
AT3G61470
AT2G29450
AT1G66180
AT5G19510
AT3G56200
AT4G32260
AT1G74050
AT3G61050
AT5G63680
AT2G22470
AT4G36690
AT5G61790
AT5G58330
AT2G42590
AT5G47200
AT2G41680
AT1G05010
AT5G66120
AT1G69410
AT3G12360
AT1G73060
AT2G18160
AT4G15550
AT4G11260
AT2G19760
AT1G15820
AT5G08280
AT5G21020
AT5G05200
AT2G42790
AT4G38520
AT2G34860
AT3G17390
AT3G02780
AT1G08830
AT1G80380
AT3G15000
AT1G79040
AT4G36220
AT5G46110
AT1G69830
AT5G16110
AT5G62700
AT1G43170
AT5G13980
AT5G65430
AT1G04440
AT5G56030
AT3G59970
AT1G08520
AT3G17205
AT5G62190
AT4G37910
AT2G42600
AT2G19480
AT4G10340
AT2G47710
AT1G11260
AT4G12040
AT5G47930
AT2G47940
AT5G53560
AT2G25520
AT1G14740
AT5G35360
AT1G29930
AT1G50920
AT5G13550
AT2G07180
AT1G51650
AT5G35170
AT1G76670
AT3G14100
AT5G14260
AT2G43590
AT2G17420
AT4G02510
AT3G54890
AT1G27450
AT1G48920
AT4G02230
AT1G69850
AT5G45500
AT2G21660
AT1G52190
AT3G26450
AT2G35390
AT5G60410
AT3G02570
AT5G01750
AT5G57350
AT3G13410
AT4G16950
AT4G09800
AT5G60390
AT1G51680
AT4G03520
AT1G64720
AT1G60420
AT4G01690
AT3G10420
AT5G36880
AT1G09430
AT3G03150
AT4G24280
AT2G17200
AT5G64370
AT3G46620
AT3G08940
AT1G77490
AT1G09620
AT1G03090
AT4G36210
AT4G28750
AT4G34230
AT5G14800
AT1G20970
AT5G38480
AT5G54270
AT4G35830
AT5G64350
AT4G34720
AT4G26850
AT1G48410
AT2G20260
AT2G38170
AT1G11580
AT4G15560
AT5G65670
AT4G37930
AT3G16520
AT2G34660
AT1G06040
AT5G19140
AT5G26360
AT4G03080
AT3G48000
AT3G17810
AT1G10290
AT1G80600
AT5G01410
AT3G26580
AT4G23460
AT1G30120
AT5G40890
AT5G16710
AT5G20630
AT1G65260
AT3G14230
AT4G27800
AT2G30870
AT3G05970
AT5G66570
AT4G22517
AT5G67300
AT3G09630
AT4G27500
AT4G20890
AT4G25640
AT1G56190
AT2G24270
AT5G10360
AT1G09570
AT2G20230
AT1G61740
AT1G53750
AT2G20990
AT5G49720
AT5G23540
AT4G03260
AT4G30160
AT4G34640
AT3G44340
AT5G35630
AT3G47800
AT3G48990
AT3G14660
AT3G45980
AT4G05050
AT5G04550
AT5G44340
AT5G60600
AT3G51840
AT2G36880
AT5G19540
AT1G42960
AT3G47470
AT3G11630
AT4G34350
AT2G40890
AT5G27350
AT4G26690
AT1G65980
AT5G18110
AT4G16830
AT5G59250
AT5G23050
AT5G53460
AT3G46510
AT1G08380
AT5G53850
AT3G18780
AT1G07670
AT2G18710
AT3G16450
AT3G04720
AT3G12120
AT5G01530
AT4G10840
AT1G11840
AT1G14610
AT1G66200
AT3G22960
AT1G30230
AT5G42270
AT5G34850
AT3G19930
AT3G48870
AT5G63980
AT1G14320
AT3G26060
AT2G45170
AT1G50250
AT5G48230
AT3G19170
AT1G49240
AT3G06810
AT3G62700
AT3G48050
AT4G15470
AT1G70700
AT1G25560
AT1G32790
AT5G03280
AT5G57655
AT3G09840
AT2G31040
AT4G19640
AT1G23310
AT5G38660
AT3G15840
AT3G05165
AT5G64570
AT4G16260
AT2G21520
AT5G63840
AT5G13710
AT3G01540
AT2G05070
AT4G28710
AT3G16140
AT5G67030
AT3G20770
AT1G03060
AT3G14930
AT3G02520
AT1G06290
AT3G04910
AT4G37980
AT3G08610
AT1G50320
AT5G60680
AT1G71220
AT3G06350
AT3G02040
AT2G34420
AT4G10060
AT3G19130
AT2G21410
AT5G62790
AT2G43150
AT4G28240
AT3G07160
AT5G13420
AT4G05070
AT5G14780
AT4G16190
AT2G18440
AT5G60710
AT4G13940
AT4G33680
AT4G11010
AT5G37600
AT1G80460
AT5G02310
AT3G11780
AT2G21170
AT5G10960
AT5G17020
AT1G44446
AT1G70780
AT2G42680
AT5G59613
AT3G56940
AT1G07940
AT3G18035
AT1G03080
AT2G22670
AT3G60130
AT5G24490
AT5G15970
AT2G30520
AT2G42210
AT3G15360
AT4G12800
AT5G52470
AT5G24930
AT1G58602
AT1G29400
AT4G13510
AT4G35000
AT4G08950
AT4G30190
AT1G74960
AT1G55360
AT1G07920
AT2G47650
AT1G23820
AT1G28330
AT2G24790
AT5G05440
AT1G15750
AT1G27320
AT5G19400
AT3G54110
AT5G64940
AT2G17390
AT3G48420
AT3G55440
AT2G14720
AT5G12470
AT1G29150
AT5G49760
AT4G31170
AT1G68830
AT5G58950
AT5G64840
AT5G11700
AT5G22770
AT3G16630
AT3G14310
AT1G75220
AT1G02305
AT1G58807
AT1G67480
AT4G03560
AT3G27770
AT1G69510
AT5G47840
AT3G24180
AT3G11400
AT4G38920
AT3G27925
AT5G02770
AT2G40840
AT2G17720
AT4G25170
AT1G76100
AT2G36850
AT5G03880
AT5G15020
AT5G43830
AT3G44480
AT3G16400
AT1G47260
AT5G54390
AT5G40810
AT5G09330
AT2G20860
AT4G12490
AT5G49360
AT5G35180
AT5G42300
AT3G54360
AT1G54080
AT1G03475
AT2G30860
AT5G23040
AT1G20440
AT2G41110
AT5G01810
AT1G27000
AT5G44380
AT3G02470
AT5G55070
AT4G01150
AT3G18490
AT3G44110
AT1G72020
AT1G79245
AT5G24690
AT3G52300
[truncated: 725 more rows]
