# Supplementary material for: Dopamine Inhibits Arabidopsis Growth through Increased Oxidative Stress and Auxin Activity
Source: MDPI journal article supplement (doi:10.3390/stresses3010026), 2023-03-02
Supplement: s1 [file s1 › Table S3.xlsx]

## Sheet: Sheet1
“up” = fold change > 2; “down” = fold change < 2. Abbreviations: ND, not detected; N/A, not applicable.
Index	Compound	0 mM DA (ng/g tissue)	0.5 mM DA (ng/g tissue)	Fold Change	Up /Down
TRP	L-tryptophan	2030 ± 87.2	2473.33 ± 140.12	1.22	-
TRA	Tryptamine	0.026 ± 0.01	ND	N/A	?
IAN	3-Indoleacetonitrile	19700 ± 5840.38	19733.33 ± 2850.15	1	-
IAM	3-Indole acetamide	1.30 ± 0.24	2.13 ± 0.47	1.63	-
ICAld	Indole-3-carboxyaldehyde	95.3 ± 45.16	704.67 ± 430.09	7.39	up
ICA	Indole-3-carboxylic Acid	184.33 ± 51.19	443 ± 219.97	2.4	up
IAA	Indole-3-acetic acid	21.3 ± 6.81	16.73 ± 1.04	0.78	-
IAAox	2-oxindole-3-acetic acid	414.33 ± 50.58	319.67 ± 106.08	0.77	-
IAA-Phe-Me	Indole-3-acetyl-L-phenylalanne methyle ester	0.48 ± 0.01	0.042 ± 0.001	0.87	-
IAA-Glu	Indole-3-acetyl glutamic acid	1.7 ± 0.03	1.85 ± 0.34	1.09	-
IAA-Leu	N-(3-Indolylacetyl)-L-leucine	1.5 ± 0.94	1.77 ± 0.77	1.18	-
IAA-Val-Me	Indole-3-acetyl-L-valine methyl ester	0.12 ± 0.057	0.13 ± 0.05	1.12	-
IAA-Asp	Indole-3-acetyl-L-aspartic acid	2.07 ± 0.172	1.53 ± 0.26	0.74	-
MEIAA	Methyl indole-3-acetate	4.27 ± 1.91	4.68 ± 1.68	1.09	-
ILA	Indole-3-lactic acid	4.44 ± 0.34	6.2 ± 0.68	1.39	-
IA	3-Indoleacrylic acid	1.9 ± 0.74	1.088 ± 0.31	0.57	-
IBA	Indole-3-butyric acid	7.08 ± 3.01	7.22 ± 0.25	1.02	-
